# Supplementary material for: Copper-promoted indirect trifluoromethylthiolation of sulfuryl chloride with TMSCF3: facile access to trifluoromethyl thioethers
Source: Royal Society of Chemistry journal article supplement (doi:10.1039/d3nj01319g), 2023-01-01
Supplement: d3nj01319g1.pdf [file d3nj01319g1.pdf]

## Supporting Information

### Copper-promoted indirect trifluoromethylthiolation of sulfonyl chloride with TMSCF<sub>3</sub>: a facile access to trifluoromethyl thioethers

Changge Zheng,<sup>\*a</sup> Kui Zhao,<sup>a</sup> Chao Jiang,<sup>a</sup> Ruilong Feng,<sup>a</sup> Chunxiang Li,<sup>a</sup> Xifei Chen,<sup>a</sup> Chongbin Wei,<sup>a</sup> Xinxin Gong,<sup>a</sup> Jianquan Hong<sup>\*a†</sup>

*†Key Laboratory of Synthetic and Biological Colloids, Ministry of Education, School of Chemical and Material Engineering, Jiangnan University, Wuxi, Jiangsu 214122, P. R. China*

### Table of Contents

|                                                                                                  |      |
|--------------------------------------------------------------------------------------------------|------|
| 1. General Information.....                                                                      | S-1  |
| 2. General procedure for synthesis of trifluoromethyl thioethers.....                            | S-1  |
| 3. Modification of complex natural product and pharmaceutical molecules.....                     | S-2  |
| 4. Synthesis of aryl trifluoromethyl thioethers in 6 mmol scale .....                            | S-3  |
| 5. Characterization data of the products .....                                                   | S-3  |
| 6. Mechanism study .....                                                                         | S-10 |
| 7. <sup>1</sup> H NMR, <sup>13</sup> C NMR and <sup>19</sup> F NMR spectra of the products ..... | S-11 |
| 8. HRMS analysis reports for the new compounds .....                                             | S-62 |
| 9. References .....                                                                              | S-67 |

## 1. General Information

Unless otherwise noted, all commercially available materials were purchased from Energy Chemical and used without further purification. Column chromatography was carried out on silica gel 60 (200–300 mesh). Thin-layer chromatography (TLC) was performed using 60 mesh silica gel plates and visualized with short-wavelength UV light (254 nm). <sup>1</sup>H NMR, <sup>13</sup>C NMR, <sup>19</sup>F NMR were all recorded using CDCl<sub>3</sub> as a solvent on a Bruker 400 MHz spectrometer at 298 K (400 MHz for <sup>1</sup>H, 100 MHz for <sup>13</sup>C, and 376 MHz for <sup>19</sup>F). Chemical shifts ( $\delta$ ) were measured in ppm relative to TMS  $\delta = 0$  for <sup>1</sup>H or to chloroform  $\delta = 77.0$  for <sup>13</sup>C as an internal standard. Data are reported as follows: chemical shift, multiplicity (s = singlet, d = doublet, t = triplet, q = quartet, dd = doublet of doublets, dq = doublet of quartets, m = multiplet). Coupling constant *J* was reported in hertz (Hz).

## 2. General procedure for synthesis of trifluoromethyl thioethers

Table SI. Optimization of the reaction conditions<sup>a</sup>

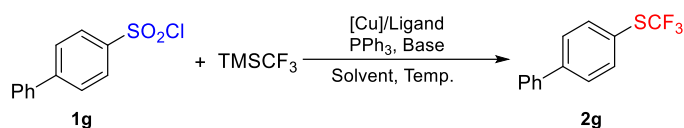

| Entry           | [Cu]              | Ligand       | PPh <sub>3</sub> (eq.) | additive                        | Solvent            | Temp. (°C) | time (h)  | Yield (%) <sup>b</sup> |
|-----------------|-------------------|--------------|------------------------|---------------------------------|--------------------|------------|-----------|------------------------|
| 1               | -                 | -            | 2.0                    | KF                              | CH <sub>3</sub> CN | 25         | 14        | 0                      |
| 2               | CuI               | bpy          | 2.0                    | KF                              | CH <sub>3</sub> CN | 25         | 14        | 8                      |
| 3               | CuI               | bpy          | 1.0                    | KF                              | CH <sub>3</sub> CN | 25         | 14        | 6                      |
| 4               | CuI               | bpy          | 1.5                    | KF                              | CH <sub>3</sub> CN | 25         | 14        | 18                     |
| 5               | CuI               | bpy          | 1.5                    | KF                              | DMSO               | 25         | 14        | 5                      |
| 6               | CuI               | bpy          | 1.5                    | KF                              | DMF                | 25         | 14        | 71                     |
| 7               | CuI               | bpy          | 1.5                    | KF                              | DMAc               | 25         | 14        | 12                     |
| 8               | CuI               | bpy          | 1.5                    | KF                              | H <sub>2</sub> O   | 25         | 14        | 0                      |
| 9               | CuI               | bpy          | 1.5                    | K <sub>2</sub> CO <sub>3</sub>  | DMF                | 25         | 14        | 35                     |
| 10              | CuI               | bpy          | 1.5                    | <i>t</i> -BuOK                  | DMF                | 25         | 14        | 2                      |
| 11              | CuI               | bpy          | 1.5                    | Cs <sub>2</sub> CO <sub>3</sub> | DMF                | 25         | 14        | 37                     |
| 12              | CuI               | bpy          | 1.5                    | NaOAc                           | DMF                | 25         | 14        | 29                     |
| <b>13</b>       | <b>CuI</b>        | <b>bpy</b>   | <b>1.5</b>             | <b>CsF</b>                      | <b>DMF</b>         | <b>25</b>  | <b>14</b> | <b>82</b>              |
| 14              | CuBr              | bpy          | 1.5                    | CsF                             | DMF                | 25         | 14        | 61                     |
| 15              | CuBr <sub>2</sub> | bpy          | 1.5                    | CsF                             | DMF                | 25         | 14        | 67                     |
| 16              | CuCl              | bpy          | 1.5                    | CsF                             | DMF                | 25         | 14        | 49                     |
| 17              | CuCl <sub>2</sub> | bpy          | 1.5                    | CsF                             | DMF                | 25         | 14        | 48                     |
| 18              | CuI               | 1,10-Phen    | 1.5                    | CsF                             | DMF                | 25         | 14        | 23                     |
| 19              | CuI               | 4,4'-bpy     | 1.5                    | CsF                             | DMF                | 25         | 14        | 0                      |
| 20              | CuI               | bpy          | 1.5                    | CsF                             | DMF                | 60         | 14        | 73                     |
| 21              | CuI               | bpy          | 1.5                    | CsF                             | DMF                | 90         | 14        | 80                     |
| 22              | CuI (1.0 eq)      | bpy (1.0 eq) | 1.5                    | CsF                             | DMF                | 25         | 14        | 78                     |
| 23              | CuI (0.1 eq)      | bpy (0.1 eq) | 1.5                    | CsF                             | DMF                | 25         | 14        | 65                     |
| 24              | CuI               | bpy          | 1.5                    | CsF                             | DMF                | 25         | 6         | 71                     |
| 25              | CuI               | bpy          | 1.5                    | CsF                             | DMF                | 25         | 24        | 82                     |
| 26 <sup>c</sup> | CuI               | bpy          | 1.5                    | CsF                             | DMF                | 25         | 14        | 65                     |

<sup>a</sup>Reaction conditions: **1a** (0.10 mmol, 1.0 equiv), TMSCF<sub>3</sub> (0.40 mmol, 4.0 equiv), PPh<sub>3</sub> (0.15 mmol, 1.5 equiv), Cu salts (0.02 mmol, 20 mol%), ligand (0.02 mmol, 20 mol%), base (0.40 mmol, 4.0 equiv), 4,4-

Difluorobiphenyl (0.1 mmol, 1.0 equiv, internal standard), solvent (1.5 ml). <sup>b</sup>Yields determined by <sup>19</sup>F NMR spectroscopy based on **1a**. <sup>c</sup>TMSCF<sub>3</sub> 2.0 equiv; CsF 2.0 equiv.

To an oven-dried 25 mL Schlenk tube equipped with a stir bar were added sulfonyl chloride **1a** (0.5 mmol), TMSCF<sub>3</sub> (4.0 equiv), CuI (0.2 equiv), bpy (0.2 equiv), PPh<sub>3</sub> (1.5 equiv), CsF (4.0 equiv). The Schlenk tube was evacuated and refilled with dry nitrogen (three times). DMF (5 mL) was then added to the tube by syringe. The reaction mixture was required to stir for 14 hours at room temperature in a nitrogen atmosphere. After the reaction finished, the reaction mixture was diluted with dichloromethane, filtered through a plug of celite and washed with dichloromethane. The filtrate was washed with H<sub>2</sub>O (3×10 mL). The organic layer was washed with brine (30 mL) and dried over anhydrous Na<sub>2</sub>SO<sub>4</sub>, then concentrated under vacuum. The residue was purified by silica gel flash column chromatography (200-300 mesh) using petroleum ether (60-90 °C) as eluent.

### 3. Modification of complex natural product and pharmaceutical molecules

The arylsulfonyl chloride **1'i** corresponding to product **3i** was prepared according to the literature procedures.<sup>1</sup>

#### 1) Synthesis of estrone derivative<sup>a</sup>

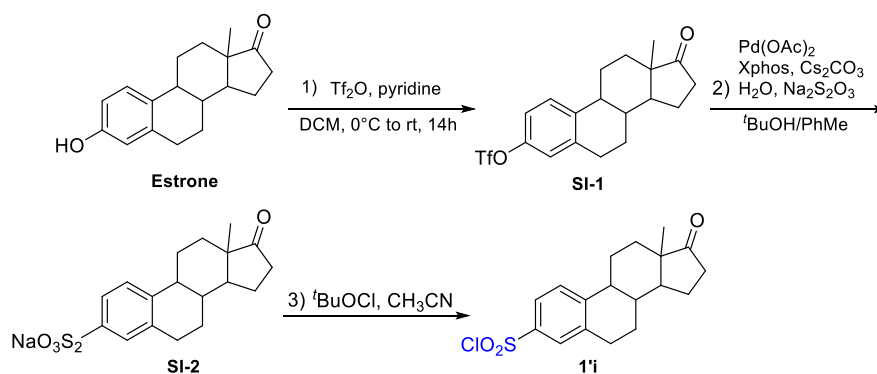

<sup>a</sup>Reagents and conditions: 1) estrone (4.056 g, 15.0 mmol, 1 equiv.), pyridine (3.640 mL, 3 equiv.), DCM (90 mL), 0 °C, trifluoromethanesulfonic anhydride (3.028 mL, 18 mmol, 1.2 equiv.) was added dropwise. Then the mixture was stirred at room temperature for 14 h. 2) **SI-1** (2.415 g, 6.0 mmol, 1.0 equiv.), Pd(OAc)<sub>2</sub> (0.135 g, 0.6 mmol, 10 mol%), xphos (0.858 g, 1.8 mmol, 30 mol%), Cs<sub>2</sub>CO<sub>3</sub> (3.91g, 12.0 mmol, 2.0 equiv.), H<sub>2</sub>O (0.216g, 12.0 mmol, 2.0 equiv.), Na<sub>2</sub>S<sub>2</sub>O<sub>3</sub> (2.367g, 15.0 mmol, 2.5 equiv.), <sup>t</sup>BuOH/PhMe (36.0/54.0 mL), N<sub>2</sub>, 80 °C, 8 h. 3) **SI-2** (1.095g, 2.0 mmol, 1.0 equiv.), H<sub>2</sub>O (0.18 mg, 10.0 mmol, 5.0 equiv.), <sup>t</sup>BuOCl (1.086 g, 10.0 mmol, 5.0 equiv.), CH<sub>3</sub>CN (30 mL), 0 °C, 30 min.

2) Target product of complex substrates were prepared according to the general procedure.

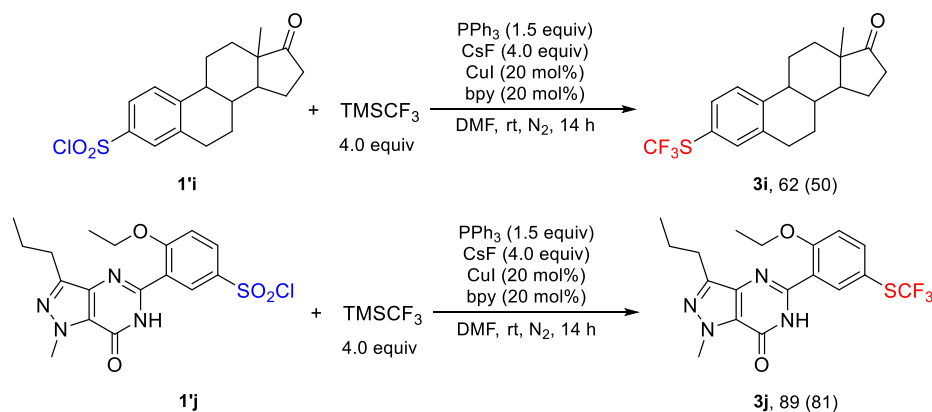

#### 4. Synthesis of aryl trifluoromethyl thioethers in 6 mmol scale

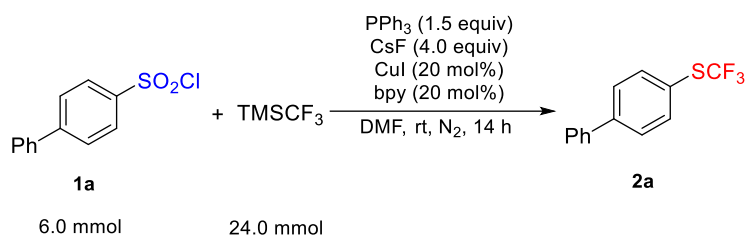

To an oven-dried 100 mL Schlenk tube equipped with a stir bar were added arylsulfonyl chloride **1a** (6 mmol, 1.516g, 1 equiv), TMSCF<sub>3</sub> (24 mmol, 3.408g, 4.0 equiv), CuI (1.2 mmol, 0.229g, 0.2 equiv), bpy (1.2 mmol, 0.187g, 0.2 equiv), PPh<sub>3</sub> (9 mmol, 2.361g, 1.5 equiv), CsF (24 mmol, 3.648g, 4.0 equiv). The Schlenk tube was evacuated and refilled with dry nitrogen (three times). DMF (60 mL) was then added to the tube by syringe. The reaction mixture was required to stirred for 14 hours at room temperature in a nitrogen atmosphere. After the reaction finished, the reaction mixture was diluted with dichloromethane, filtered through a plug of celite and washed with dichloromethane. The filtrate was washed with H<sub>2</sub>O (3×60 mL). The combined organic layer was washed with brine and dried over anhydrous Na<sub>2</sub>SO<sub>4</sub>, then concentrated under vacuum and the residue was purified by silica gel flash column chromatography (200-300 mesh) using petroleum ether (60-90 °C) as eluent to afford pure compound **2a** (1.099 g, 72%).

#### 5. Characterization data of the products

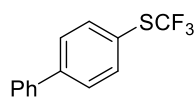

**(1,1'-biphenyl)-4-yl(trifluoromethyl)sulfane (2a)**<sup>2</sup> Following the general procedure, compound **2a** was synthesized and isolated as white solid (0.095 g, 75%). <sup>1</sup>H NMR (400 MHz, CDCl<sub>3</sub>) δ 7.71 (d, *J* = 8.3 Hz, 2H), 7.64 – 7.55 (m, 4H), 7.50 – 7.42 (m, 2H), 7.41 – 7.35 (m, 1H). <sup>19</sup>F NMR (376 MHz, CDCl<sub>3</sub>) δ -42.70 (s). <sup>13</sup>C NMR (101 MHz, CDCl<sub>3</sub>) δ 143.8 (s), 139.7 (s), 136.7 (s), 129.6 (q, *J* = 308.3 Hz), 129.0 (s), 128.2 (s), 127.2 (s), 123.1 (dd, *J* = 3.9, 1.9 Hz).

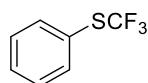

**phenyl(trifluoromethyl)sulfane (2b)**<sup>3</sup> Following the general procedure, compound **2b** was synthesized and isolated as a colorless liquid (0.026 g, 29%). <sup>1</sup>H NMR (400 MHz, CDCl<sub>3</sub>) δ 7.65 (d, *J* = 7.4 Hz, 2H), 7.51 – 7.45 (m, 1H), 7.41 (t, *J* = 7.5 Hz, 2H). <sup>19</sup>F NMR (376 MHz, CDCl<sub>3</sub>) δ -42.77 (s). <sup>13</sup>C NMR (101 MHz, CDCl<sub>3</sub>) δ 136.4 (s), 130.8 (s), 129.7 (q, *J* = 307.9 Hz), 129.5 (s), 124.4 (dd, *J* = 4.1, 2.0 Hz).

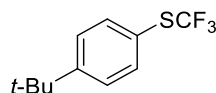

**(4-(tert-butyl)phenyl)(trifluoromethyl)sulfane (2c)**<sup>3</sup> Following the general procedure, compound **2c** was synthesized and isolated as yellow oil (0.081 g, 69%). <sup>1</sup>H NMR (400 MHz, CDCl<sub>3</sub>) δ 7.57 (d, *J* = 8.4 Hz, 2H), 7.47 – 7.39 (m, 2H), 1.33 (s, 9H). <sup>19</sup>F NMR (376 MHz, CDCl<sub>3</sub>) δ -42.98 (s). <sup>13</sup>C NMR (101 MHz, CDCl<sub>3</sub>) δ 154.4 (s), 136.2 (s), 129.7 (q, *J* = 307.9 Hz), 126.6 (s), 120.9 (dd, *J* = 4.1, 2.0 Hz).

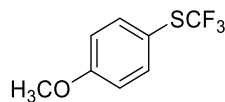

**(4-methoxyphenyl)(trifluoromethyl)sulfane (2d)**<sup>3</sup> Following the general procedure, compound **2d** was synthesized and isolated as colorless oil (0.036g, 35%). <sup>1</sup>H NMR (400 MHz, CDCl<sub>3</sub>)  $\delta$  7.57 (d,  $J$  = 8.8 Hz, 2H), 6.99 – 6.87 (m, 2H), 3.83 (s, 3H). <sup>19</sup>F NMR (376 MHz, CDCl<sub>3</sub>)  $\delta$  -43.94 (s). <sup>13</sup>C NMR (101 MHz, CDCl<sub>3</sub>)  $\delta$  161.9 (s), 138.3 (s), 129.6 (q,  $J$  = 308.1 Hz), 115.0 (s), 114.8 (d,  $J$  = 2.2 Hz), 55.4 (s).

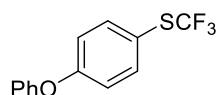

**(4-phenoxyphenyl)(trifluoromethyl)sulfane (2e)**<sup>4</sup> Following the general procedure, compound **2e** was synthesized and isolated as colorless oil (0.077g, 57%). <sup>1</sup>H NMR (400 MHz, CDCl<sub>3</sub>)  $\delta$  7.63 (d,  $J$  = 8.7 Hz, 2H), 7.47 – 7.37 (m, 2H), 7.23 (t,  $J$  = 7.4 Hz, 1H), 7.10 (dd,  $J$  = 8.5, 0.9 Hz, 2H), 7.06 – 6.99 (m, 2H). <sup>19</sup>F NMR (376 MHz, CDCl<sub>3</sub>)  $\delta$  -43.52 (s). <sup>13</sup>C NMR (101 MHz, CDCl<sub>3</sub>)  $\delta$  160.42 (s), 155.6 (s), 138.4 (s), 130.1 (s), 129.6 (q,  $J$  = 308.2 Hz), 124.6 (s), 120.1 (s), 118.6 (s), 117.3 (dd,  $J$  = 4.1, 2.0 Hz).

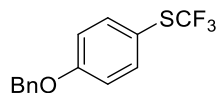

**(4-benzyloxyphenyl)(trifluoromethyl)sulfane (2f)**<sup>4</sup> Following the general procedure, compound **2f** was synthesized and isolated as colorless oil (0.078 g, 55%). <sup>1</sup>H NMR (400 MHz, CDCl<sub>3</sub>)  $\delta$  7.57 (d,  $J$  = 8.8 Hz, 2H), 7.42 – 7.34 (m, 5H), 7.02 – 6.97 (m, 2H), 5.08 (s, 2H). <sup>19</sup>F NMR (376 MHz, CDCl<sub>3</sub>)  $\delta$  -43.82 (s). <sup>13</sup>C NMR (101 MHz, CDCl<sub>3</sub>)  $\delta$  161.0 (s), 138.3 (s), 136.2 (s), 129.6 (q,  $J$  = 308.1 Hz), 128.7 (s), 128.3 (s), 127.5 (s), 115.8 (s), 115.1 (q,  $J$  = 2.0 Hz), 70.2 (s).

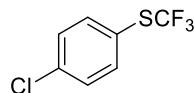

**(4-chlorophenyl)(trifluoromethyl)sulfane (2g)**<sup>3</sup> Following the general procedure, compound **2g** was synthesized and isolated as colorless oil (0.021 g, 20%). <sup>1</sup>H NMR (400 MHz, CDCl<sub>3</sub>)  $\delta$  7.55 (d,  $J$  = 8.5 Hz, 2H), 7.38 – 7.33 (m, 2H). <sup>19</sup>F NMR (376 MHz, CDCl<sub>3</sub>)  $\delta$  -42.95 (s). <sup>13</sup>C NMR (101 MHz, CDCl<sub>3</sub>)  $\delta$  137.7 (s), 137.6 (s), 129.77 (s), 129.4 (q,  $J$  = 308.2 Hz), 122.8 (q,  $J$  = 2.1 Hz).

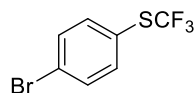

**(4-bromophenyl)(trifluoromethyl)sulfane (2h)**<sup>4</sup> Following the general procedure, compound **2h** was synthesized and isolated as colorless oil (0.039 g, 30%). <sup>1</sup>H NMR (400 MHz, CDCl<sub>3</sub>)  $\delta$  7.59 – 7.55 (m, 2H), 7.52 (d,  $J$  = 8.5 Hz, 2H). <sup>19</sup>F NMR (376 MHz, CDCl<sub>3</sub>)  $\delta$  -42.52 (s). <sup>13</sup>C NMR (101 MHz, CDCl<sub>3</sub>)  $\delta$  140.2 (s), 134.8 (s), 131.3 (s), 129.6 (q,  $J$  = 308.6 Hz), 121.8 (d,  $J$  = 2.1 Hz).

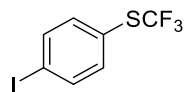

**(4-iodophenyl)(trifluoromethyl)sulfane (2i)**<sup>3</sup> Following the general procedure, compound **2i** was synthesized and isolated as colorless oil (0.058 g, 38%). <sup>1</sup>H NMR (400 MHz, CDCl<sub>3</sub>)  $\delta$  7.80 – 7.74 (m, 2H), 7.40 – 7.34 (m, 2H). <sup>19</sup>F NMR (376 MHz, CDCl<sub>3</sub>)  $\delta$  -43.29 (s). <sup>13</sup>C NMR (101 MHz, CDCl<sub>3</sub>)  $\delta$  138.8 (s), 137.7 (s), 129.2 (q,  $J$  = 308.4 Hz), 124.2 (dd,  $J$  = 4.3, 2.2 Hz), 98.0 (s).

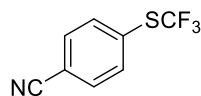

**4-((trifluoromethyl)thio)benzotrile (2j)**<sup>4</sup> Following the general procedure, compound **2j** was synthesized and isolated as colorless oil (0.04 g, 39%). <sup>1</sup>H NMR (400 MHz, CDCl<sub>3</sub>)  $\delta$  7.77 (d,  $J$  = 8.3 Hz, 2H), 7.75 – 7.69 (m, 2H). <sup>19</sup>F NMR (376 MHz, CDCl<sub>3</sub>)  $\delta$  -41.53 (s). <sup>13</sup>C NMR (101 MHz, CDCl<sub>3</sub>)  $\delta$  136.0 (s), 133.0 (s), 130.6 (q,  $J$  = 2.1 Hz), 129.1 (q,  $J$  = 308.8 Hz), 117.6 (s), 114.7 (s).

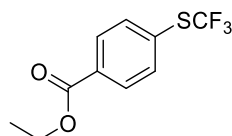

**ethyl 4-((trifluoromethyl)thio)benzoate (2k)**<sup>4</sup> Following the general procedure, compound **2k** was synthesized and isolated as colorless oil (0.065 g, 52%). <sup>1</sup>H NMR (400 MHz, CDCl<sub>3</sub>)  $\delta$  8.12 – 8.06 (m, 2H), 7.72 (d,  $J$  = 8.3 Hz, 2H), 4.40 (q,  $J$  = 7.1 Hz, 2H), 1.41 (t,  $J$  = 7.1 Hz, 3H). <sup>19</sup>F NMR (376 MHz, CDCl<sub>3</sub>)  $\delta$  -43.82 (s). <sup>13</sup>C NMR (101 MHz, CDCl<sub>3</sub>)  $\delta$  165.6 (s), 135.6 (s), 132.6 (s), 130.4 (s), 129.7 (dd,  $J$  = 4.1, 2.0 Hz), 129.3 (q,  $J$  = 308.4 Hz), 61.5 (s), 14.3 (s).

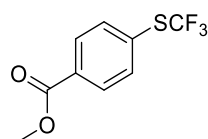

**1-(4-((trifluoromethyl)thio)phenyl)ethan-1-one (2l)**<sup>3</sup> Following the general procedure, compound **2l** was synthesized and isolated as colorless oil (0.059 g, 50%). <sup>1</sup>H NMR (400 MHz, CDCl<sub>3</sub>)  $\delta$  8.27 – 7.97 (m, 2H), 7.72 (d,  $J$  = 8.3 Hz, 2H), 3.94 (s, 3H). <sup>19</sup>F NMR (376 MHz, CDCl<sub>3</sub>)  $\delta$  -41.83 (s). <sup>13</sup>C NMR (101 MHz, CDCl<sub>3</sub>)  $\delta$  166.1 (s), 135.6 (s), 132.2 (s), 130.4 (s), 129.9 (dd,  $J$  = 4.1, 2.1 Hz), 129.3 (q,  $J$  = 308.3 Hz), 52.5 (s).

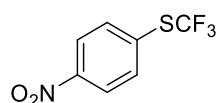

**(4-nitrophenyl)(trifluoromethyl)sulfane (2m)**<sup>5</sup> Following the general procedure, compound **2m** was synthesized and isolated as yellow oil (0.035 g, 31%). <sup>1</sup>H NMR (400 MHz, CDCl<sub>3</sub>)  $\delta$  8.31 – 8.24 (m, 2H), 7.85 (t,  $J$  = 7.4 Hz, 2H). <sup>19</sup>F NMR (376 MHz, CDCl<sub>3</sub>)  $\delta$  -41.31 (s). <sup>13</sup>C NMR (101 MHz, CDCl<sub>3</sub>)  $\delta$  136.1 (d,  $J$  = 0.4 Hz), 129.1 (q,  $J$  = 310.1 Hz), 126.8 (dd,  $J$  = 7.1, 3.0 Hz), 124.4 (s), 124.1 (s).

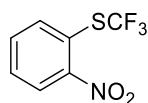

**(2-nitrophenyl)(trifluoromethyl)sulfane (2n)**<sup>5</sup> Following the general procedure, compound **2n** was synthesized and isolated as yellow oil (0.019 g, 17%). <sup>1</sup>H NMR (400 MHz, CDCl<sub>3</sub>)  $\delta$  8.13 (dd,  $J$  = 8.2, 1.4 Hz,

1H), 7.84 (d,  $J = 8.1$  Hz, 1H), 7.68 (td,  $J = 7.8, 1.5$  Hz, 1H), 7.58 – 7.53 (m, 1H).  $^{19}\text{F}$  NMR (376 MHz,  $\text{CDCl}_3$ )  $\delta$  -43.14 (s).  $^{13}\text{C}$  NMR (101 MHz,  $\text{CDCl}_3$ )  $\delta$  149.4 (d,  $J = 1.6$  Hz), 133.7 (s), 132.4 (d,  $J = 2.1$  Hz), 129.5 (s), 128.9 (q,  $J = 310.4$  Hz), 125.7 (s), 124.1 (d,  $J = 2.2$  Hz).

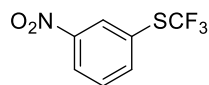

**(3-nitrophenyl)(trifluoromethyl)sulfane (2o)**<sup>6</sup> Following the general procedure, compound **2o** was synthesized and isolated as yellow oil (0.030 g, 27%).  $^1\text{H}$  NMR (400 MHz,  $\text{CDCl}_3$ )  $\delta$  8.53 (d,  $J = 1.7$  Hz, 1H), 8.37 (ddd,  $J = 8.3, 2.1, 0.9$  Hz, 1H), 8.00 (d,  $J = 7.8$  Hz, 1H), 7.66 (t,  $J = 8.0$  Hz, 1H).  $^{19}\text{F}$  NMR (376 MHz,  $\text{CDCl}_3$ )  $\delta$  -42.05 (s).  $^{13}\text{C}$  NMR (101 MHz,  $\text{CDCl}_3$ )  $\delta$  148.6 (s), 141.8 (s), 130.8 (s), 130.5 (s), 129.1 (q,  $J = 308.8$  Hz), 126.7 (dd,  $J = 4.0, 2.0$  Hz), 125.8 (s).

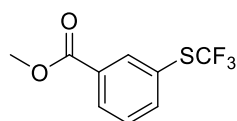

**1-(3-((trifluoromethyl)thio)phenyl)ethan-1-one (2p)**<sup>7</sup> Following the general procedure, compound **2p** was synthesized and isolated as colorless oil (0.041 g, 35%).  $^1\text{H}$  NMR (400 MHz,  $\text{CDCl}_3$ )  $\delta$  8.33 (s, 1H), 8.22 – 8.12 (m, 1H), 7.85 (d,  $J = 7.8$  Hz, 1H), 7.52 (t,  $J = 7.7$  Hz, 1H), 3.95 (s, 3H).  $^{19}\text{F}$  NMR (376 MHz,  $\text{CDCl}_3$ )  $\delta$  -42.48 (s).  $^{13}\text{C}$  NMR (101 MHz,  $\text{CDCl}_3$ )  $\delta$  165.80 (s), 140.4 (s), 137.3 (s), 131.9 (s), 131.7 (s), 129.6 (s), 129.4 (q,  $J = 308.3$  Hz), 125.1 (dd,  $J = 4.0, 2.0$  Hz), 52.5 (s).

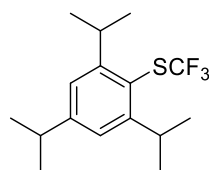

**(trifluoromethyl)(2,4,6-triisopropylphenyl)sulfane (2q)**<sup>8</sup> Following the general procedure, compound **2q** was synthesized and isolated as colorless liquid (0.090 g, 59%).  $^1\text{H}$  NMR (400 MHz,  $\text{CDCl}_3$ )  $\delta$  7.09 (s, 2H), 3.90 (dt,  $J = 13.7, 6.9$  Hz, 2H), 2.90 (dt,  $J = 13.8, 6.9$  Hz, 1H), 1.26 (d,  $J = 6.9$  Hz, 8H), 1.22 (d,  $J = 8.2$  Hz, 12H).  $^{19}\text{F}$  NMR (376 MHz,  $\text{CDCl}_3$ )  $\delta$  -42.70 (s).  $^{13}\text{C}$  NMR (101 MHz,  $\text{CDCl}_3$ )  $\delta$  155.1 (s), 152.5 (s), 129.6 (q,  $J = 309.2$  Hz), 122.6 (s), 121.8 (s), 117.8 (d,  $J = 1.6$  Hz), 34.4 (s), 31.6 (s), 23.8 (s).

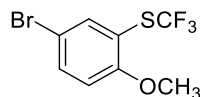

**(5-bromo-2-methoxyphenyl)(trifluoromethyl)sulfane (2r)**<sup>2</sup> Following the general procedure, compound **2r** was synthesized and isolated as colorless oil (0.065 g, 45%).  $^1\text{H}$  NMR (400 MHz,  $\text{CDCl}_3$ )  $\delta$  7.73 (d,  $J = 2.4$  Hz, 1H), 7.55 (dd,  $J = 8.8, 2.5$  Hz, 1H), 6.86 (d,  $J = 8.9$  Hz, 1H), 3.89 (s, 3H).  $^{19}\text{F}$  NMR (376 MHz,  $\text{CDCl}_3$ )  $\delta$  -42.04 (s).  $^{13}\text{C}$  NMR (101 MHz,  $\text{CDCl}_3$ )  $\delta$  158.6 (s), 139.2 (s), 134.5 (s), 128.3 (q,  $J = 309.3$  Hz), 113.4 (dd,  $J = 3.9, 2.0$  Hz), 112.2 (s), 111.6 (s), 55.3 (s).

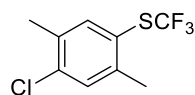

**(4-chloro-2,5-dimethylphenyl)(trifluoromethyl)sulfane (2s)** Following the general procedure, compound **2s** was synthesized and isolated as colorless oil (0.058 g, 48%). <sup>1</sup>H NMR (400 MHz, CDCl<sub>3</sub>) δ 7.51 (s, 1H), 7.32 (s, 1H), 2.47 (s, 3H), 2.35 (s, 3H). <sup>19</sup>F NMR (376 MHz, CDCl<sub>3</sub>) δ -42.52 (s). <sup>13</sup>C NMR (101 MHz, CDCl<sub>3</sub>) δ 142.9 (s), 140.2 (s), 137.8 (s), 134.8 (s), 131.3 (s), 129.6 (q, *J* = 308.6 Hz), 121.8 (d, *J* = 2.1 Hz), 20.6 (s), 19.4 (s). HRMS *m/z* (EI): calcd. for C<sub>9</sub>H<sub>8</sub>ClF<sub>3</sub>S, [M]<sup>+</sup>: 239.9987; found: 239.9988.

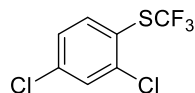

**(2,4-Dichlorophenyl)(trifluoromethyl)sulfane (2t)** Following the general procedure, compound **2t** was synthesized and isolated as colorless oil (0.025 g, 20%). <sup>1</sup>H NMR (400 MHz, CDCl<sub>3</sub>) δ 7.69 (d, *J* = 8.4 Hz, 1H), 7.57 (d, *J* = 2.2 Hz, 1H), 7.32 (dd, *J* = 8.4, 2.2 Hz, 1H). <sup>19</sup>F NMR (376 MHz, CDCl<sub>3</sub>) δ -42.05 (s). <sup>13</sup>C NMR (101 MHz, CDCl<sub>3</sub>) δ 141.1 (s), 139.2 (s), 138.3 (s), 130.6 (s), 129.0 (q, *J* = 309.7 Hz), 128.1 (s), 122.5 (dd, *J* = 4.3, 2.2 Hz). HRMS *m/z* (EI): calcd. for C<sub>7</sub>H<sub>3</sub>Cl<sub>2</sub>F<sub>3</sub>S, [M]<sup>+</sup>: 245.9285; found: 245.9283.

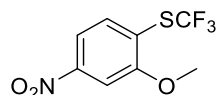

**(2-methoxy-4-nitrophenyl)(trifluoromethyl)sulfane (2u)** Following the general procedure, compound **2u** was synthesized and isolated as a yellow oil (0.049 g, 39%). <sup>1</sup>H NMR (400 MHz, CDCl<sub>3</sub>) δ 7.87 (dd, *J* = 8.5, 2.3 Hz, 1H), 7.80 (d, *J* = 2.2 Hz, 1H), 7.76 (d, *J* = 8.5 Hz, 1H), 4.02 (s, 3H). <sup>19</sup>F NMR (376 MHz, CDCl<sub>3</sub>) δ -43.32 (s). <sup>13</sup>C NMR (101 MHz, CDCl<sub>3</sub>) δ 159.7 (s), 150.2 (s), 136.0 (d, *J* = 1.1 Hz), 129.0 (q, *J* = 309.4 Hz), 121.8 (dd, *J* = 4.0, 2.0 Hz), 116.0 (s), 106.3 (s), 56.8 (s). HRMS *m/z* (EI): calcd. for C<sub>8</sub>H<sub>6</sub>O<sub>3</sub>NF<sub>3</sub>S, [M]<sup>+</sup>: 253.0020; found: 253.0012.

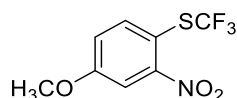

**(4-methoxy-2-nitrophenyl)(trifluoromethyl)sulfane (2v)**<sup>9</sup> Following the general procedure, compound **2v** was synthesized and isolated as yellow oil (0.038 g, 30%). <sup>1</sup>H NMR (400 MHz, CDCl<sub>3</sub>) δ 7.74 (d, *J* = 8.8 Hz, 1H), 7.47 (d, *J* = 2.8 Hz, 1H), 7.17 (dd, *J* = 8.8, 2.8 Hz, 1H), 3.92 (s, 3H). <sup>19</sup>F NMR (376 MHz, CDCl<sub>3</sub>) δ -42.05 (s). <sup>13</sup>C NMR (101 MHz, CDCl<sub>3</sub>) δ 161.3 (s), 153.1 (dd, *J* = 2.8, 1.3 Hz), 137.1 (d, *J* = 1.1 Hz), 128.9 (q, *J* = 310.1 Hz), 119.4 (s), 111.0 (dd, *J* = 4.8, 2.5 Hz), 110.5 (s), 56.2 (s).

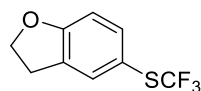

**5-((trifluoromethyl)thio)-2,3-dihydrobenzofuran (2w)**<sup>10</sup> Following the general procedure, compound **2w** was synthesized and isolated as colorless oil (0.087 g, 79%). <sup>1</sup>H NMR (400 MHz, CDCl<sub>3</sub>) δ 7.45 (s, 1H), 7.41 (d, *J* = 8.3 Hz, 1H), 6.80 (d, *J* = 8.3 Hz, 1H), 4.64 (t, *J* = 8.8 Hz, 2H), 3.24 (t, *J* = 8.8 Hz, 2H). <sup>19</sup>F NMR (376 MHz, CDCl<sub>3</sub>) δ -44.18 (s). <sup>13</sup>C NMR (101 MHz, CDCl<sub>3</sub>) δ 156.0 (s), 137.3 (s), 135.1 (s), 128.6 (q, *J* = 308.1 Hz), 127.7 (s), 127.2 (s), 126.5 (s), 114.1 (dd, *J* = 4.0, 2.0 Hz), 69.1 (s).

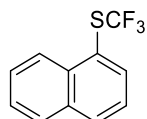



**naphthalen-1-yl(trifluoromethyl)sulfane (3a)**<sup>2</sup> Following the general procedure, compound **3a** was synthesized and isolated as colorless oil (0.067 g, 59%). <sup>1</sup>H NMR (400 MHz, CDCl<sub>3</sub>) δ 8.53 (d, *J* = 8.5 Hz, 1H), 7.95 (t, *J* = 7.5 Hz, 2H), 7.86 (d, *J* = 8.2 Hz, 1H), 7.62 (ddd, *J* = 8.4, 6.9, 1.3 Hz, 1H), 7.59 – 7.50 (m, 1H), 7.46 (dd, *J* = 8.1, 7.4 Hz, 1H). <sup>19</sup>F NMR (376 MHz, CDCl<sub>3</sub>) δ -43.14 (s). <sup>13</sup>C NMR (101 MHz, CDCl<sub>3</sub>) δ 136.7 (s), 136.7 (s), 134.34 (s), 133.2 (s), 131.3 (s), 128.7 (q, *J* = 309.2 Hz), 127.5 (s), 126.6 (s), 125.7 (s), 124.8 (s), 124.5 (s), 120.6 (dd, *J* = 3.6, 1.8 Hz).

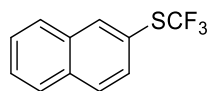

**naphthalen-2-yl(trifluoromethyl)sulfane (3b)**<sup>4</sup> Following the general procedure, compound **3b** was synthesized and isolated as colorless oil (0.071 g, 62%). <sup>1</sup>H NMR (400 MHz, CDCl<sub>3</sub>) δ 8.19 (s, 1H), 7.86 (d, *J* = 8.3 Hz, 3H), 7.66 (dd, *J* = 8.5, 1.2 Hz, 1H), 7.60 – 7.51 (m, 2H). <sup>19</sup>F NMR (376 MHz, CDCl<sub>3</sub>) δ -42.47 (s). <sup>13</sup>C NMR (101 MHz, CDCl<sub>3</sub>) δ 137.0 (s), 133.9 (s), 133.4 (s), 131.8 (s), 129.8 (q, *J* = 309.1 Hz), 129.2 (s), 128.2 (s), 128.0 (s), 127.8 (s), 127.0 (s), 121.5 (dd, *J* = 3.9, 1.9 Hz).

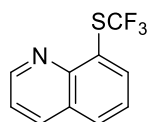

**8-((trifluoromethyl)thio)quinolone (3c)**<sup>11</sup> Following the general procedure, compound **3c** was synthesized and isolated as colorless liquid (0.069 g, 60%). <sup>1</sup>H NMR (400 MHz, CDCl<sub>3</sub>) δ 9.04 (dd, *J* = 4.2, 1.6 Hz, 1H), 8.22 (dd, *J* = 8.3, 1.6 Hz, 1H), 8.09 (d, *J* = 7.4 Hz, 1H), 7.90 (d, *J* = 9.1 Hz, 1H), 7.59 (t, *J* = 7.8 Hz, 1H), 7.52 (dd, *J* = 8.3, 4.2 Hz, 1H). <sup>19</sup>F NMR (376 MHz, CDCl<sub>3</sub>) δ -41.10 (s). <sup>13</sup>C NMR (101 MHz, CDCl<sub>3</sub>) δ 150.7 (s), 146.6 (s), 136.8 (s), 134.3 (d, *J* = 1.1 Hz), 129.9 (q, *J* = 308.5 Hz), 129.7 (s), 128.8 (s), 126.7 (s), 122.1 (s).

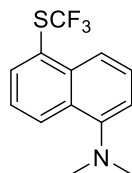

**N,N-dimethyl-5-((trifluoromethyl)thio)naphthalen-1-amine (3d)**<sup>12</sup> Following the general procedure, compound **3d** was synthesized and isolated as yellow oil (0.079 g, 58%). <sup>1</sup>H NMR (400 MHz, CDCl<sub>3</sub>) δ 8.46 (d, *J* = 8.6 Hz, 1H), 8.24 (d, *J* = 8.5 Hz, 1H), 7.94 (d, *J* = 7.1 Hz, 1H), 7.60 – 7.43 (m, 2H), 7.15 (d, *J* = 7.4 Hz, 1H), 2.88 (s, 6H). <sup>19</sup>F NMR (376 MHz, CDCl<sub>3</sub>) δ -42.24 (s). <sup>13</sup>C NMR (101 MHz, CDCl<sub>3</sub>) δ 151.4 (s), 137.8 (s), 136.8 (s), 129.8 (s), 129.7 (q, *J* = 309.2 Hz), 128.6 (s), 127.5 (s), 124.6 (s), 121.8 (d, *J* = 1.8 Hz), 120.6 (s), 115.0 (s), 45.4 (s).

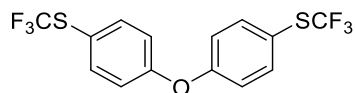

**Bis[4-((trifluoromethyl)sulfonyl)phenyl] ether (3e)** Following the general procedure, compound **3e** was synthesized and isolated as colorless oil (0.137 g, 74%). <sup>1</sup>H NMR (400 MHz, CDCl<sub>3</sub>) δ 7.67 – 7.63 (m, 4H), 7.09 – 7.04 (m, 4H). <sup>19</sup>F NMR (376 MHz, CDCl<sub>3</sub>) δ -43.29 (s). <sup>13</sup>C NMR (101 MHz, CDCl<sub>3</sub>) δ 157.7 (s), 137.5 (s), 128.4 (q, *J* = 308.2 Hz), 118.9 (s), 118.0 (q, *J* = 2.1 Hz). HRMS *m/z* (EI): calcd. for C<sub>14</sub>H<sub>8</sub>OF<sub>6</sub>S<sub>2</sub>, [M]<sup>+</sup>: 369.9921; found: 369.9912.

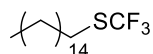

**1-[(trifluoromethyl)thio]hexadecane (3f)**<sup>13</sup> Following the general procedure, compound **3f** was synthesized and isolated as colorless oil (0.052 g, 32%). <sup>1</sup>H NMR (400 MHz, CDCl<sub>3</sub>)  $\delta$  2.92 – 2.81 (m, 2H), 1.74 – 1.63 (m, 2H), 1.44 – 1.35 (m, 2H), 1.26 (s, 24H), 0.88 (t,  $J$  = 6.8 Hz, 3H). <sup>19</sup>F NMR (376 MHz, CDCl<sub>3</sub>)  $\delta$  -41.29 (s). <sup>13</sup>C NMR (101 MHz, CDCl<sub>3</sub>)  $\delta$  131.2 (q,  $J$  = 305.6 Hz), 32.0 (s), 29.9 (d,  $J$  = 1.9 Hz), 29.7 (br s), 29.7 (s), 29.7 (s), 29.7 (s), 29.6 (s), 29.6 (s), 29.4 (br s), 29.4 (s), 29.0 (s), 28.5 (s), 22.7 (s), 14.1 (s).

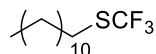

**1-[(Trifluoromethyl)thio]dodecane (3g)**<sup>14</sup> Following the general procedure, compound **3g** was synthesized and isolated as colorless oil (0.047g 35%). <sup>1</sup>H NMR (400 MHz, CDCl<sub>3</sub>)  $\delta$  2.87 (t,  $J$  = 7.5 Hz, 2H), 1.76 – 1.62 (m, 2H), 1.46 – 1.35 (m, 2H), 1.27 (s, 16H), 0.88 (t,  $J$  = 6.6 Hz, 3H). <sup>19</sup>F NMR (376 MHz, CDCl<sub>3</sub>)  $\delta$  -41.38 (s). <sup>13</sup>C NMR (101 MHz, CDCl<sub>3</sub>)  $\delta$  130.3 (q,  $J$  = 305.6 Hz), 31.0 (s), 28.9 (d,  $J$  = 1.7 Hz), 28.7 (br s), 28.6 (s), 28.4 (br s), 28.4 (s), 28.0 (s), 27.6 (s), 21.7 (s), 13.1 (s).

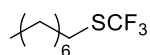

**1-[(trifluoromethyl)thio]octane (3h)**<sup>15</sup> Following the general procedure, compound **3h** was synthesized and isolated as colorless oil (0.029 g, 27%). <sup>1</sup>H NMR (400 MHz, CDCl<sub>3</sub>)  $\delta$  2.92 – 2.82 (m, 2H), 1.73 – 1.64 (m, 2H), 1.39 (dd,  $J$  = 14.2, 7.1 Hz, 2H), 1.28 (s, 8H), 0.89 (t,  $J$  = 6.9 Hz, 3H). <sup>19</sup>F NMR (376 MHz, CDCl<sub>3</sub>)  $\delta$  -41.31 (s). <sup>13</sup>C NMR (101 MHz, CDCl<sub>3</sub>)  $\delta$  131.2 (q,  $J$  = 305.6 Hz), 31.7 (s), 29.9 (dd,  $J$  = 3.8, 1.8 Hz), 29.4 (s), 29.1 (s), 28.9 (s), 28.5 (s), 22.6 (s), 14.1 (s).

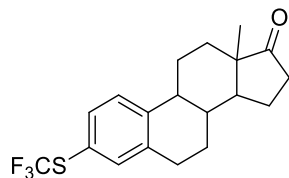

**13-methyl-3-(trifluoro(thioxo)-16-methyl)-6,7,8,9,11,12,13,14,15,16-decahydro-17H-cyclopenta[a]phenanthren-17-one (3i)**<sup>12</sup> Following the general procedure, compound **3i** was synthesized and isolated as colorless oil (0.089 g, 50%). <sup>1</sup>H NMR (400 MHz, CDCl<sub>3</sub>)  $\delta$  7.44 – 7.29 (m, 3H), 2.94 (dd,  $J$  = 9.5, 4.8 Hz, 2H), 2.61 – 2.26 (m, 3H), 2.24 – 1.93 (m, 4H), 1.74 – 1.41 (m, 6H), 0.92 (s, 3H). <sup>19</sup>F NMR (376 MHz, CDCl<sub>3</sub>)  $\delta$  -42.86 (s). <sup>13</sup>C NMR (101 MHz, CDCl<sub>3</sub>)  $\delta$  220.6 (s), 143.0 (s), 138.2 (s), 136.8 (s), 133.5 (s), 129.7 (q,  $J$  = 308.0 Hz), 126.6 (s), 121.2 (d,  $J$  = 1.9 Hz), 50.5 (s), 47.9 (s), 44.4 (s), 37.8 (s), 35.8 (s), 31.5 (s), 29.1 (s), 26.2 (s), 25.5 (s), 21.6 (s), 13.8 (s).

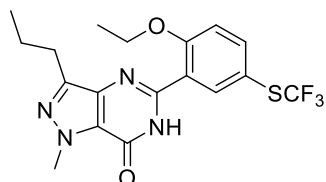

**5-(2-ethoxy-5-((trifluoromethyl)thio)phenyl)-1-methyl-3-propyl-1,6-dihydro-7H-pyrazolo[4,3-d]pyrimidin-7-one (3j)**<sup>12</sup> Following the general procedure, compound **3j** was synthesized and isolated as white solid (0.167 g, 81%). <sup>1</sup>H NMR (400 MHz, CDCl<sub>3</sub>)  $\delta$  10.95 (s, 1H), 8.70 (d,  $J$  = 2.4 Hz, 1H), 7.72 (dd,  $J$  = 8.7, 2.4 Hz, 1H), 7.08 (d,  $J$  = 8.7 Hz, 1H), 4.33 (q,  $J$  = 7.0 Hz, 2H), 4.26 (s, 3H), 2.99 – 2.90 (m, 2H), 1.93 – 1.81

(m, 2H), 1.62 (t,  $J = 7.0$  Hz, 3H), 1.04 (t,  $J = 7.4$  Hz, 3H).  $^{19}\text{F}$  NMR (376 MHz,  $\text{CDCl}_3$ )  $\delta$  -42.68 (s).  $^{13}\text{C}$  NMR (101 MHz,  $\text{CDCl}_3$ )  $\delta$  158.4 (s), 153.7 (d,  $J = 9.4$  Hz), 146.9 (d,  $J = 5.8$  Hz), 140.2 (s), 139.4 (s), 138.4 (s), 129.5 (q,  $J = 308.4$  Hz), 124.5 (s), 121.6 (s), 116.9 (dd,  $J = 4.3, 2.1$  Hz), 113.8 (s), 65.8 (s), 38.2 (s), 27.7 (s), 22.4 (s), 14.6 (s), 14.0 (s).

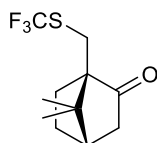

**(1S,4R)-7,7-dimethyl-1-(((trifluoromethyl)thio)methyl)bicyclo[2.2.1]heptan-2-one (3k)** Following the general procedure, compound **3k** was synthesized and isolated as white solid (0.025 g, 20%).  $^1\text{H}$  NMR (400 MHz,  $\text{CDCl}_3$ )  $\delta$  2.96 (dd,  $J = 144.8, 13.0$  Hz, 2H), 2.40 (ddd,  $J = 18.5, 4.7, 2.8$  Hz, 1H), 2.14 (t,  $J = 4.5$  Hz, 1H), 2.10 – 1.86 (m, 3H), 1.66 (ddd,  $J = 13.6, 9.3, 4.0$  Hz, 1H), 1.48 – 1.38 (m, 1H), 1.06 (s, 3H), 0.93 (s, 3H).  $^{19}\text{F}$  NMR (376 MHz,  $\text{CDCl}_3$ )  $\delta$  -42.99 (s).  $^{13}\text{C}$  NMR (101 MHz,  $\text{CDCl}_3$ )  $\delta$  216.6 (s), 131.3 (q,  $J = 305.5$  Hz), 60.2 (s), 47.9 (s), 43.7 (s), 42.9 (s), 26.8 (s), 26.6 (s), 26.4 (q,  $J = 2.5$  Hz), 20.0 (s), 19.7 (s). HRMS  $m/z$  (EI): calcd. for  $\text{C}_{11}\text{H}_{15}\text{OF}_3\text{S}$ ,  $[\text{M}]^+$ : 252.0796; found: 252.0794.

## 6. Mechanism study

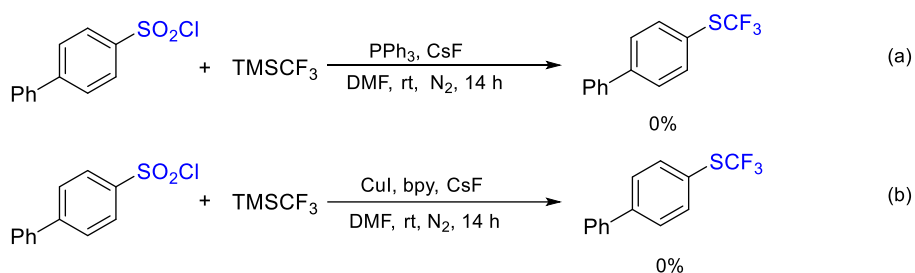

(a) To an oven-dried 25 mL Schlenk tube equipped with a stir bar was added arylsulfonyl chloride **1a** (0.5 mmol),  $\text{TMSCF}_3$  (4.0 equiv),  $\text{PPh}_3$  (1.5 equiv),  $\text{CsF}$  (4.0 equiv). The Schlenk tube was evacuated and refilled with dry nitrogen (three times). DMF (5 mL) was then added to the tube by syringe. The reaction mixture was required to stirred for 14 hours at room temperature in a nitrogen atmosphere. After the reaction finished, the reaction mixture was diluted with dichloromethane, filtered through a plug of celite and washed with dichloromethane. The filtrate was washed with  $\text{H}_2\text{O}$  ( $3 \times 10$  mL). The organic layer was washed with brine (30 mL) and dried over anhydrous  $\text{Na}_2\text{SO}_4$ , then filtered and concentrated under vacuum. The raw product was analyzed by  $^{19}\text{F}$  NMR using 4,4'-difluorobiphenyl (-115.0 ppm) as internal standard.

(b) To an oven-dried 25 mL Schlenk tube equipped with a stir bar were added arylsulfonyl chloride **1a** (0.5 mmol),  $\text{TMSCF}_3$  (4.0 equiv),  $\text{CuI}$  (0.2 equiv),  $\text{bpy}$  (0.2 equiv),  $\text{CsF}$  (4.0 equiv). The Schlenk tube was evacuated and refilled with dry nitrogen (three times). DMF (5 mL) was then added to the tube by syringe. The reaction mixture was required to stirred for 14 hours at room temperature in a nitrogen atmosphere. After the reaction finished, the reaction mixture was diluted with dichloromethane, filtered through a plug of celite and washed with dichloromethane. The filtrate was washed with  $\text{H}_2\text{O}$  ( $3 \times 10$  mL). The organic layer was washed with brine (30 mL) and dried over anhydrous  $\text{Na}_2\text{SO}_4$ , then filtered and concentrated under vacuum. The raw product was analyzed by  $^{19}\text{F}$  NMR using 4,4'-difluorobiphenyl (-115.0 ppm) as internal standard.

## 7. $^1\text{H}$ NMR, $^{13}\text{C}$ NMR and $^{19}\text{F}$ NMR spectra of the products

$^1\text{H}$  NMR spectrum of **2a** (400 MHz,  $\text{CDCl}_3$ )

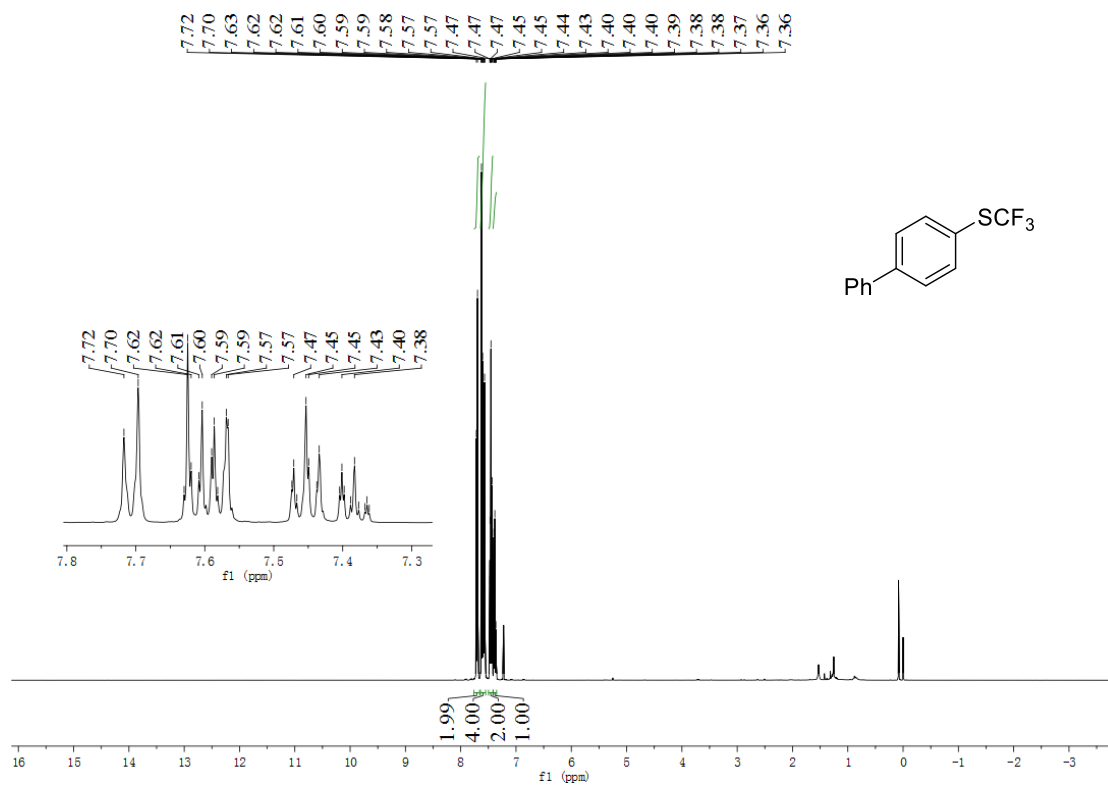

$^{19}\text{F}$  NMR spectrum of **2a** (376 MHz,  $\text{CDCl}_3$ )

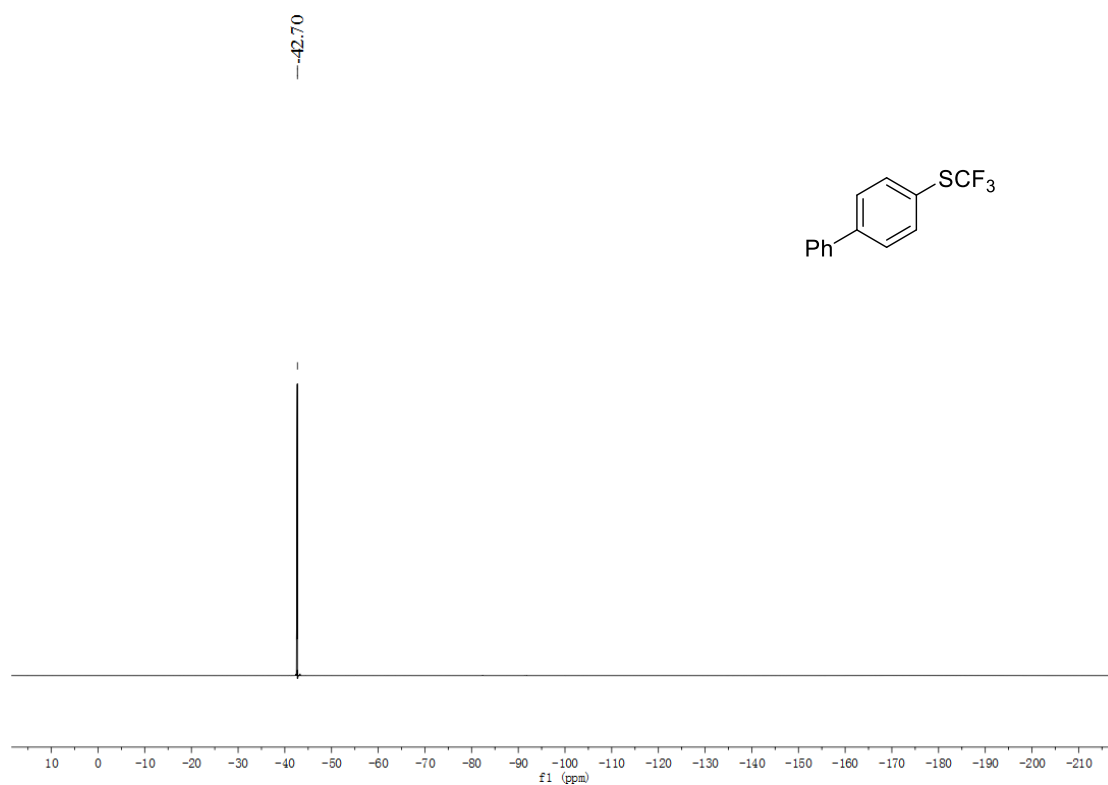

$^{13}\text{C}$  NMR spectrum of **2a** (101 MHz,  $\text{CDCl}_3$ )

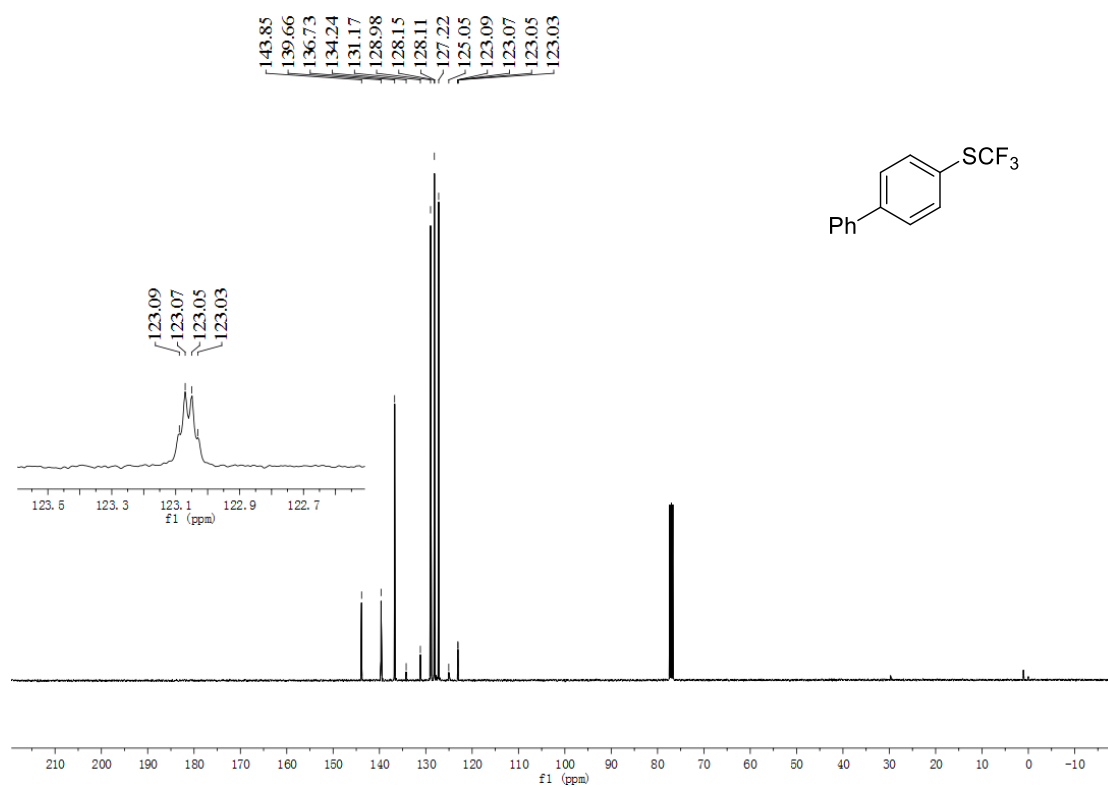

$^1\text{H}$  NMR spectrum of **2b** (400 MHz,  $\text{CDCl}_3$ )

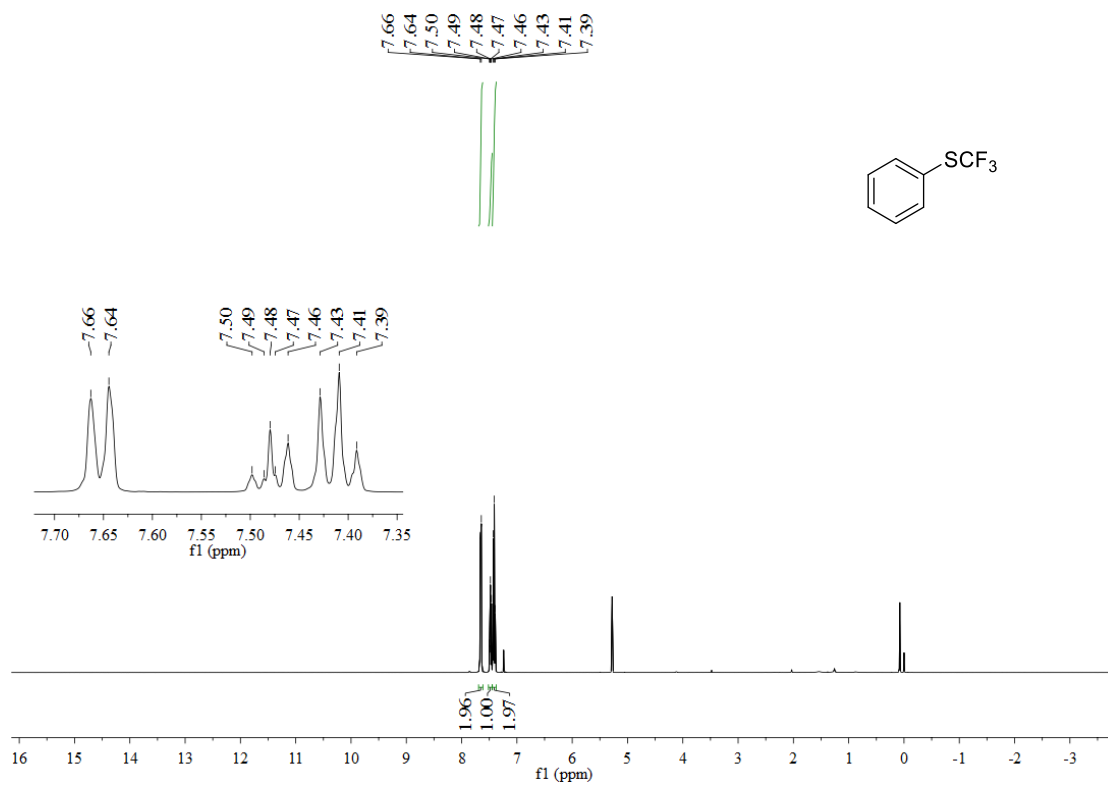

$^{19}\text{F}$  NMR spectrum of **2b** (376 MHz,  $\text{CDCl}_3$ )

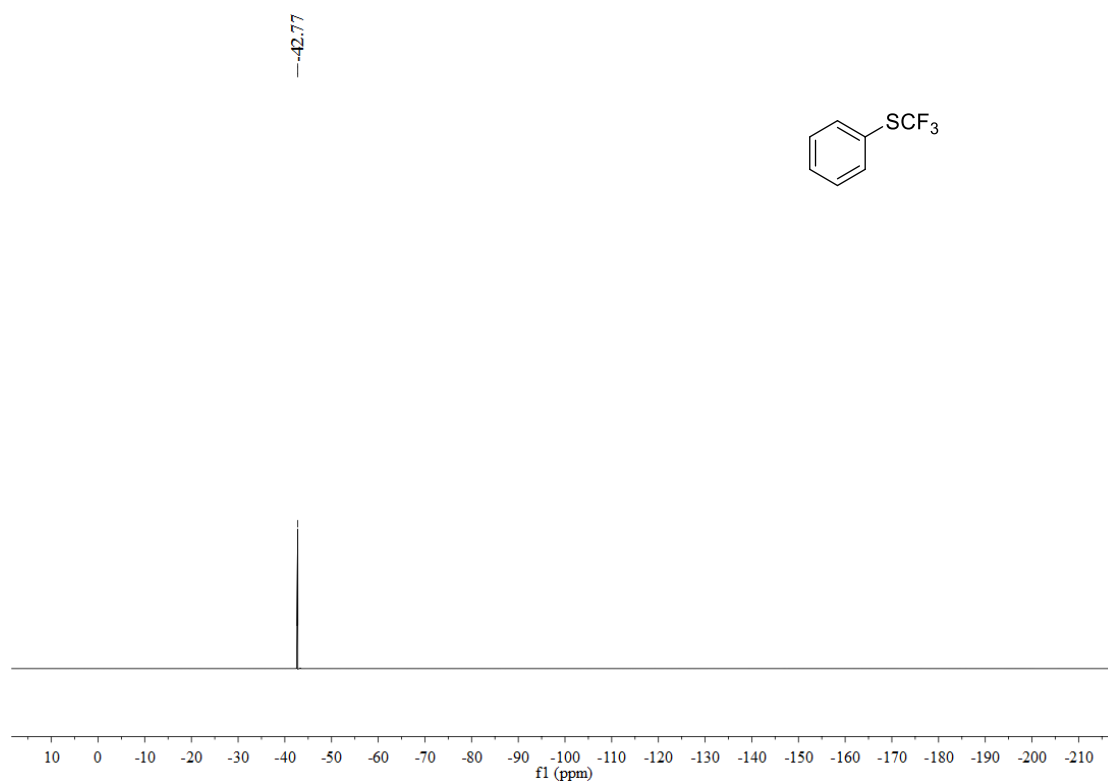

$^{13}\text{C}$  NMR spectrum of **2b** (101 MHz,  $\text{CDCl}_3$ )

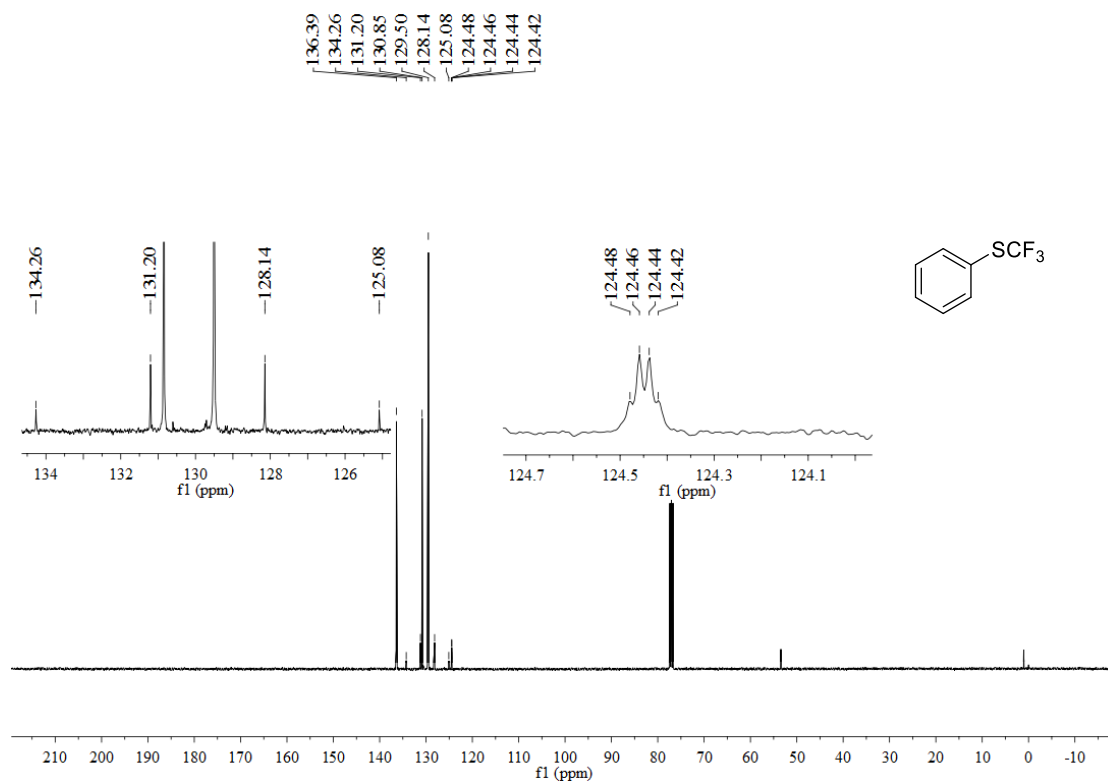

$^1\text{H}$  NMR spectrum of **2c** (400 MHz,  $\text{CDCl}_3$ )

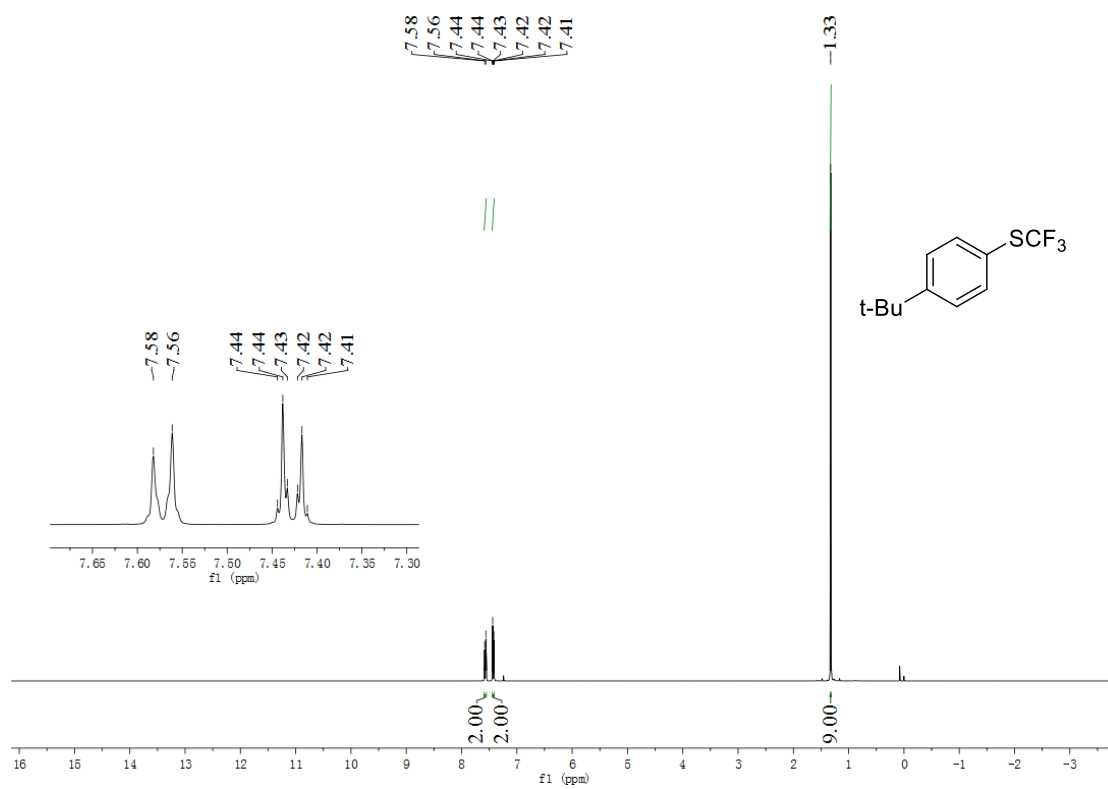

$^{19}\text{F}$  NMR spectrum of **2c** (376 MHz,  $\text{CDCl}_3$ )

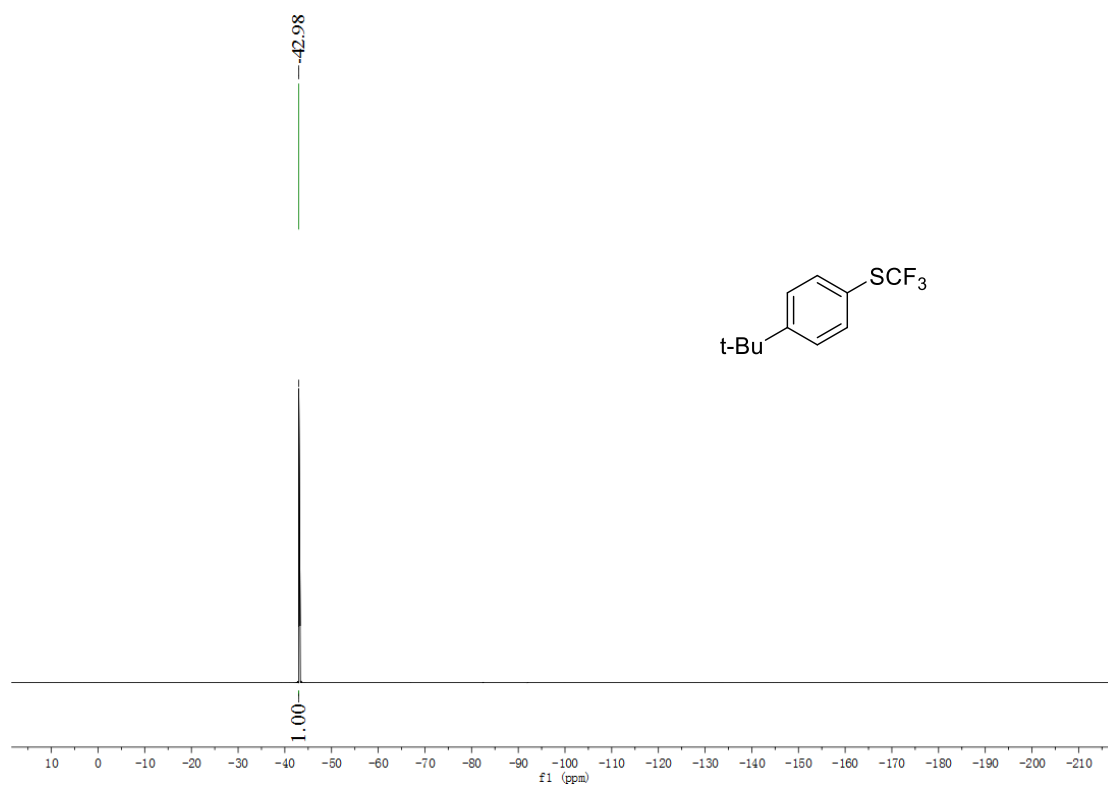

$^{13}\text{C}$  NMR spectrum of **2c** (101 MHz,  $\text{CDCl}_3$ )

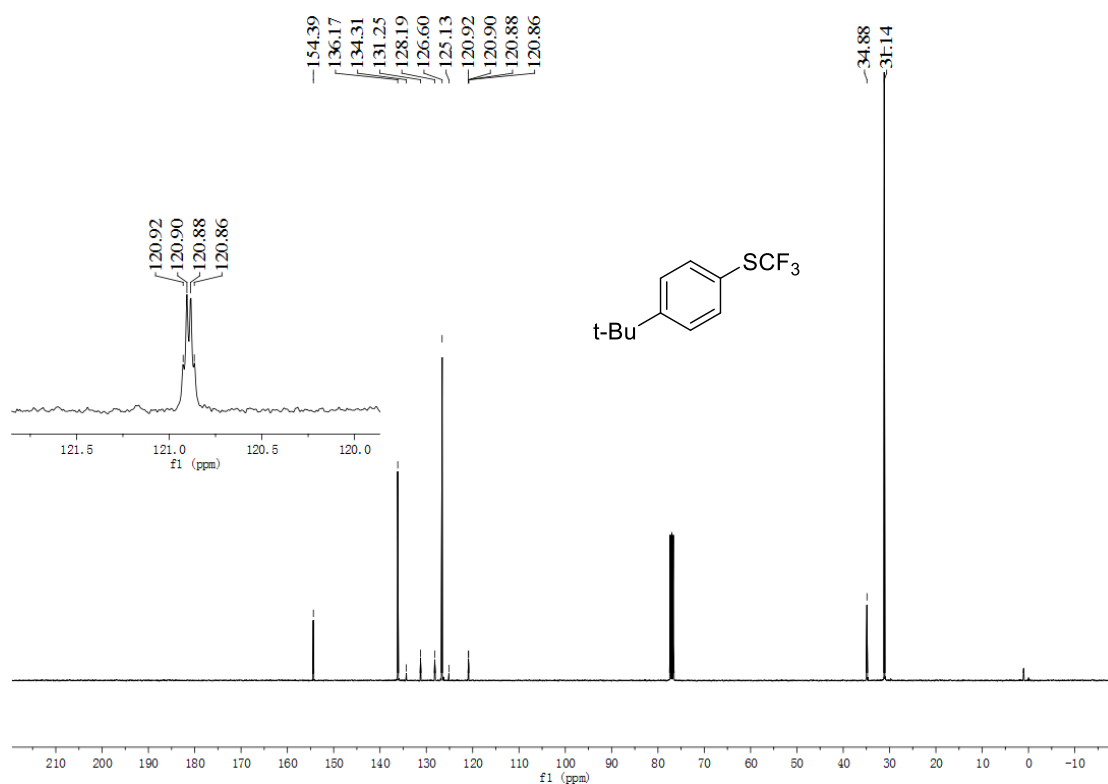

$^1\text{H}$  NMR spectrum of **2d** (400 MHz,  $\text{CDCl}_3$ )

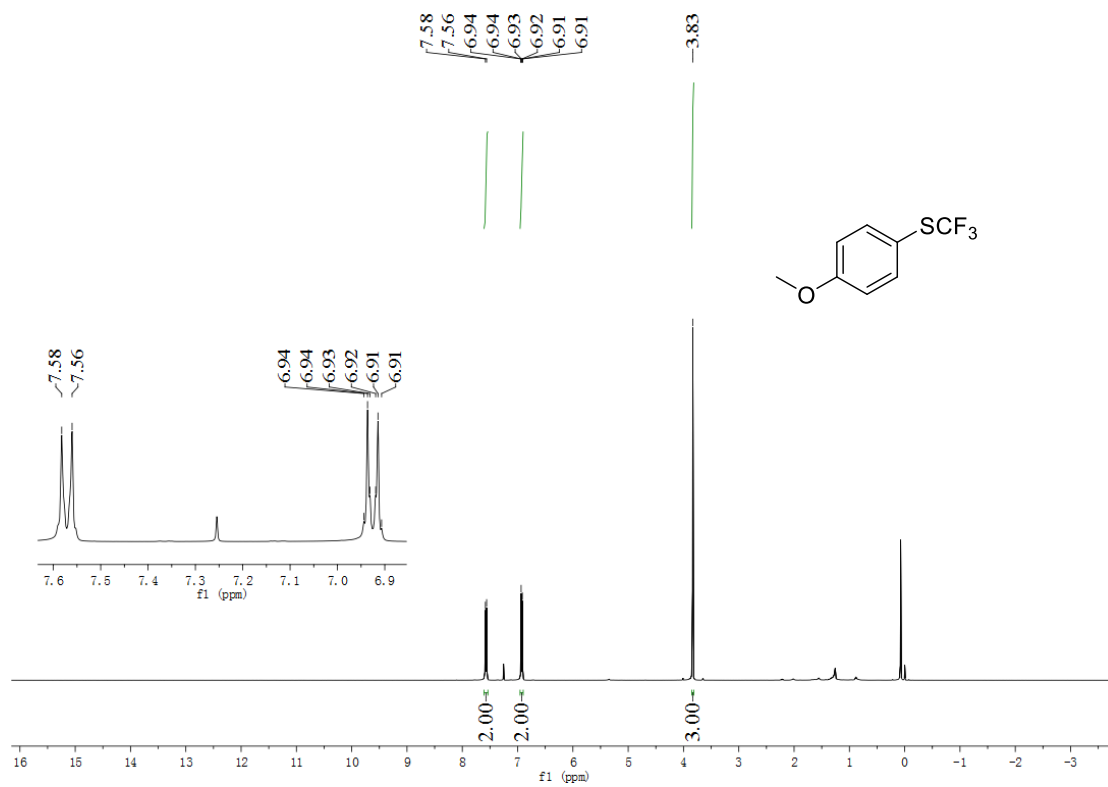



$^{19}\text{F}$  NMR spectrum of **2d** (376 MHz,  $\text{CDCl}_3$ )

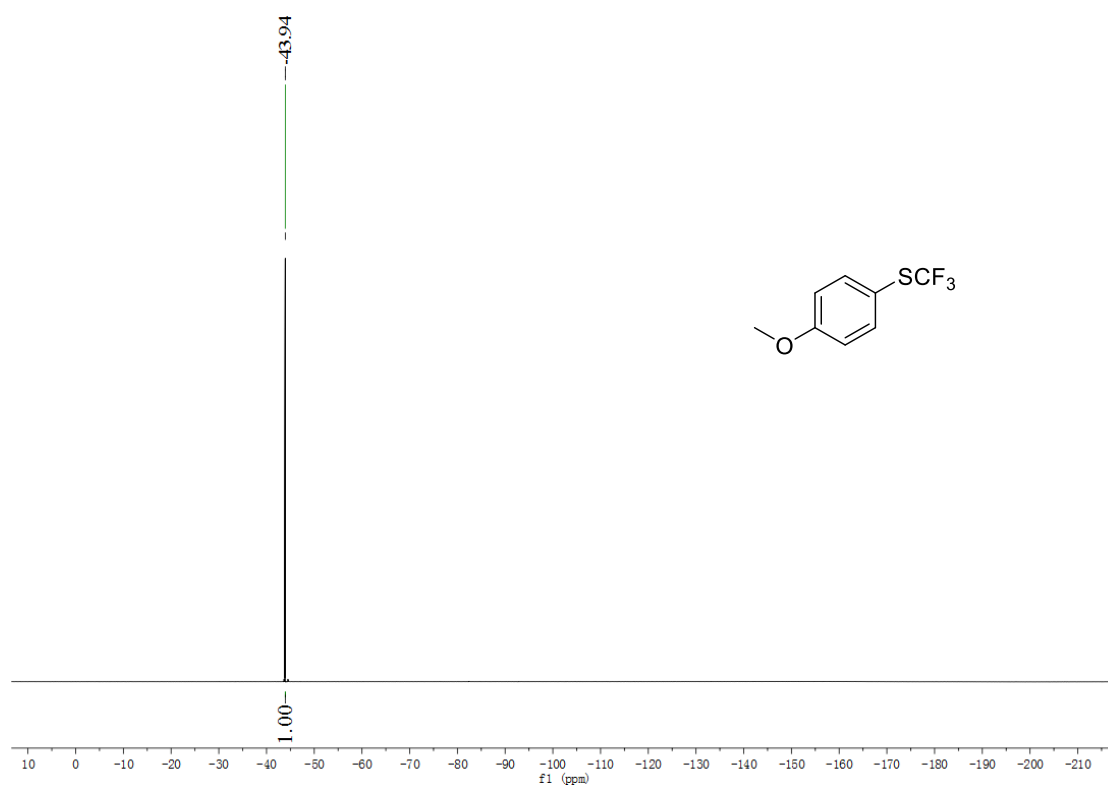

$^{13}\text{C}$  NMR spectrum of **2d** (101 MHz,  $\text{CDCl}_3$ )

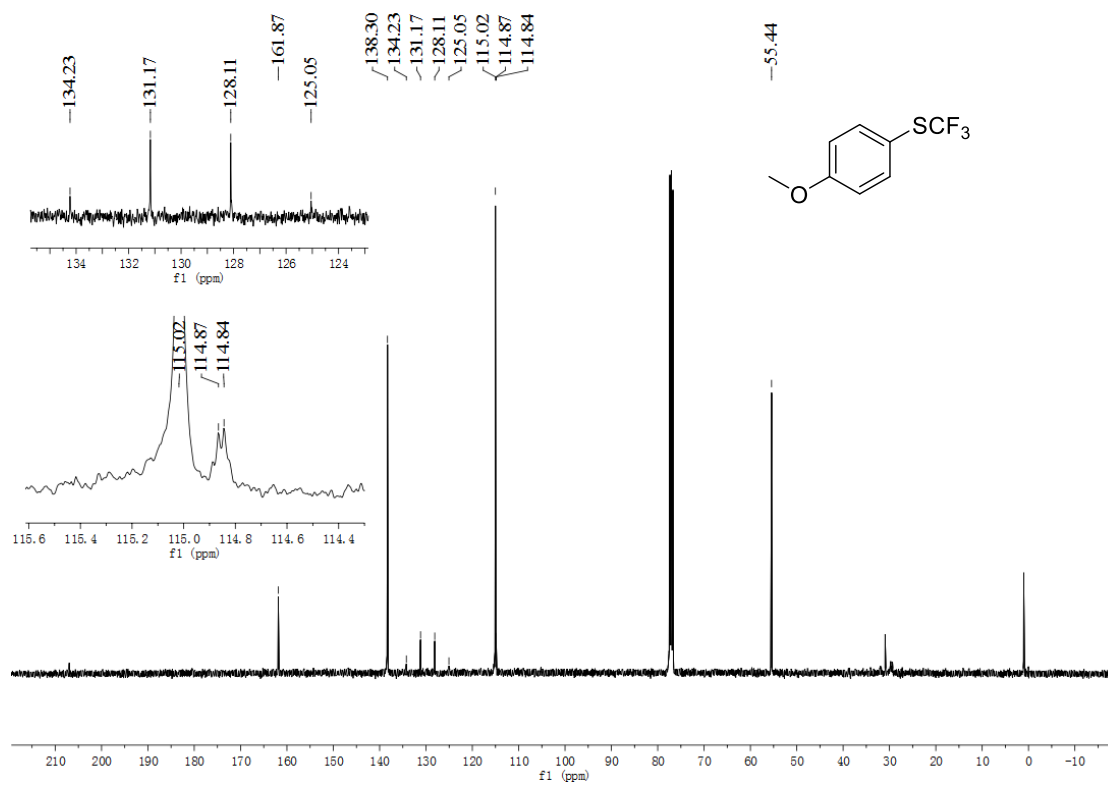

$^1\text{H}$  NMR spectrum of **2e** (400 MHz,  $\text{CDCl}_3$ )

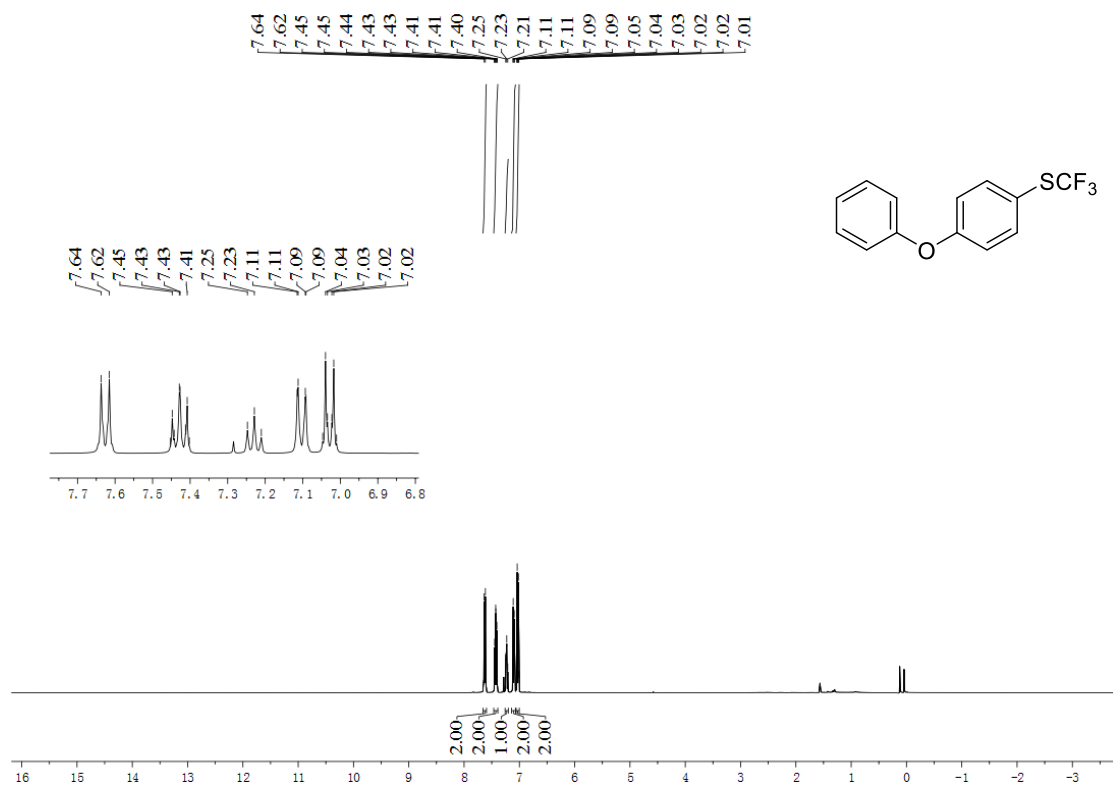

$^{19}\text{F}$  NMR spectrum of **2e** (376 MHz,  $\text{CDCl}_3$ )

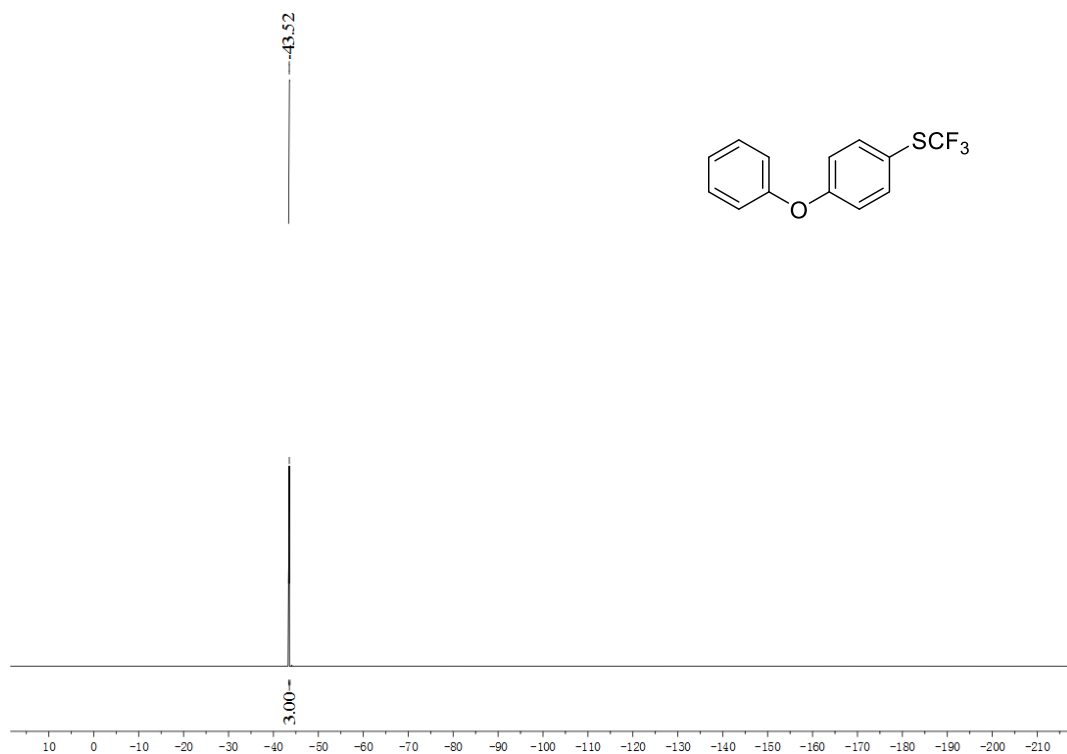

$^{13}\text{C}$  NMR spectrum of **2e** (101 MHz,  $\text{CDCl}_3$ )

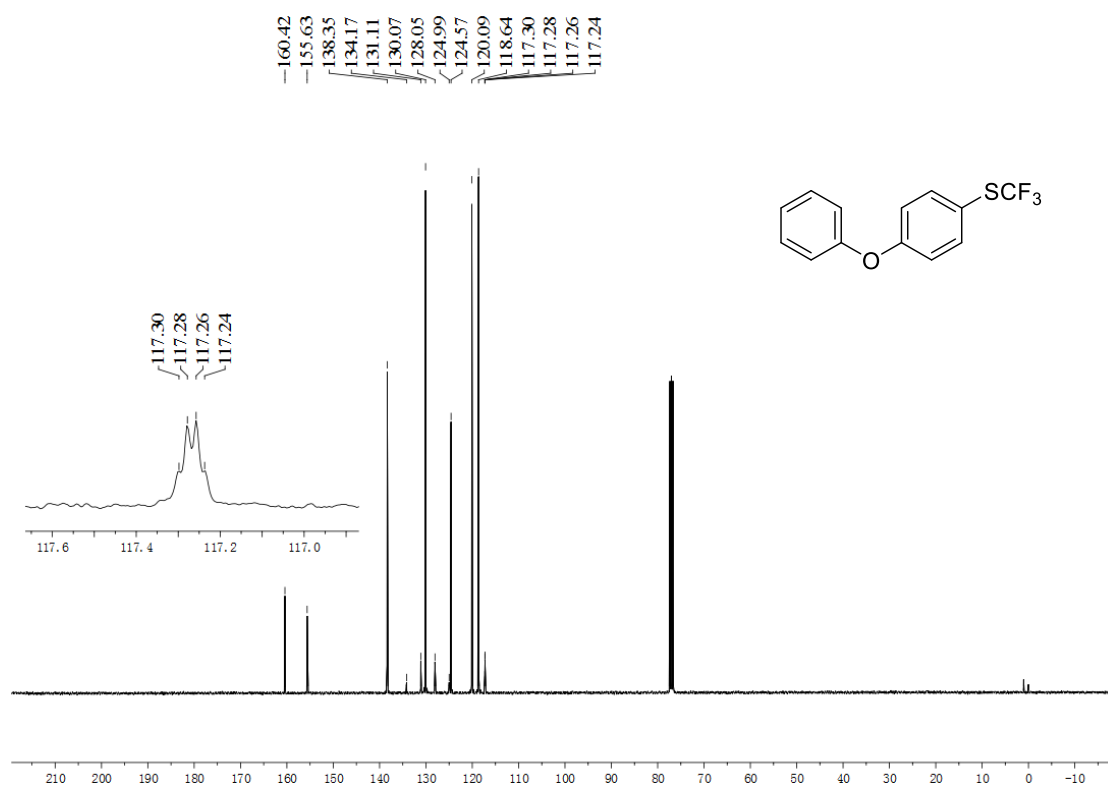

$^1\text{H}$  NMR spectrum of **2f** (400 MHz,  $\text{CDCl}_3$ )

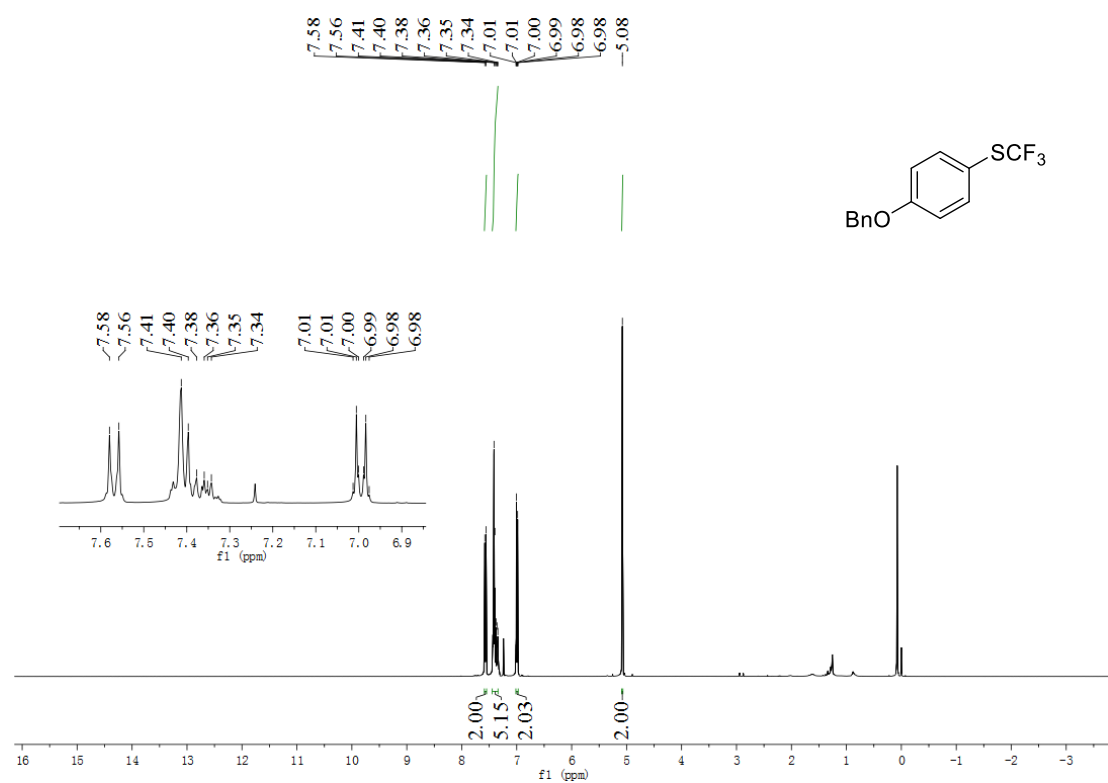

$^{19}\text{F}$  NMR spectrum of **2f** (376 MHz,  $\text{CDCl}_3$ )

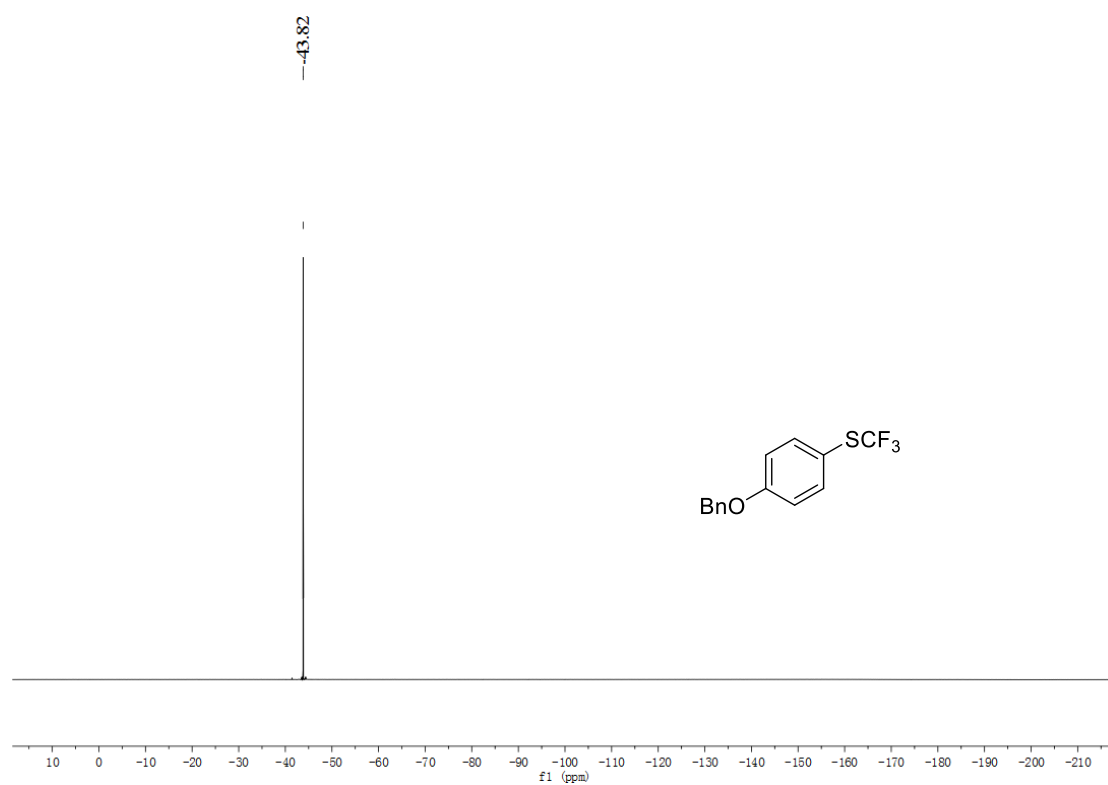

$^{13}\text{C}$  NMR spectrum of **2f** (101 MHz,  $\text{CDCl}_3$ )

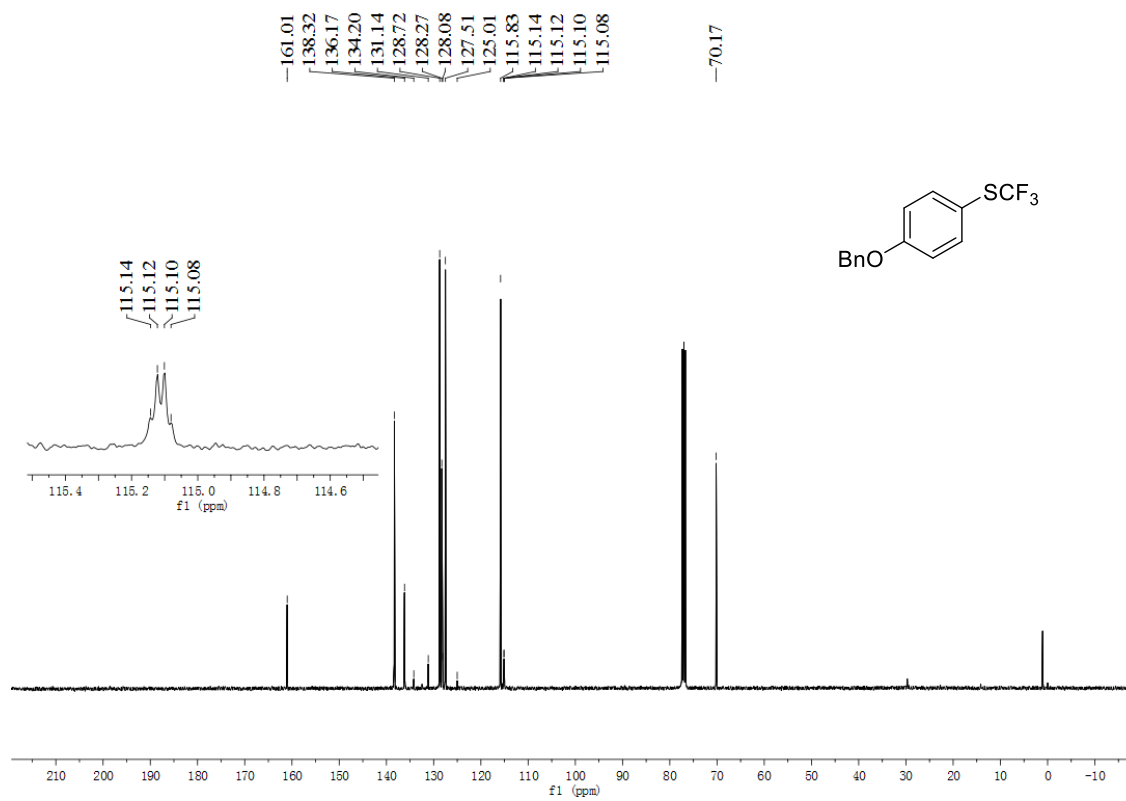

$^1\text{H}$  NMR spectrum of **2g** (400 MHz,  $\text{CDCl}_3$ )

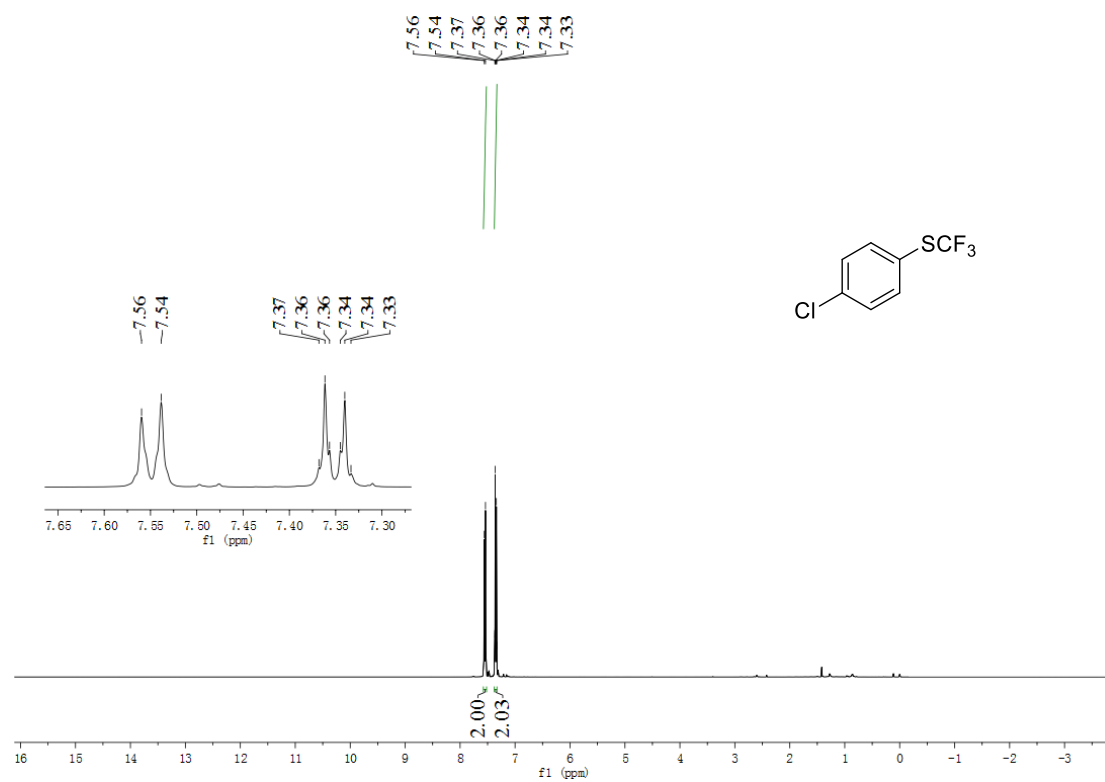

$^{19}\text{F}$  NMR spectrum of **2g** (376 MHz,  $\text{CDCl}_3$ )

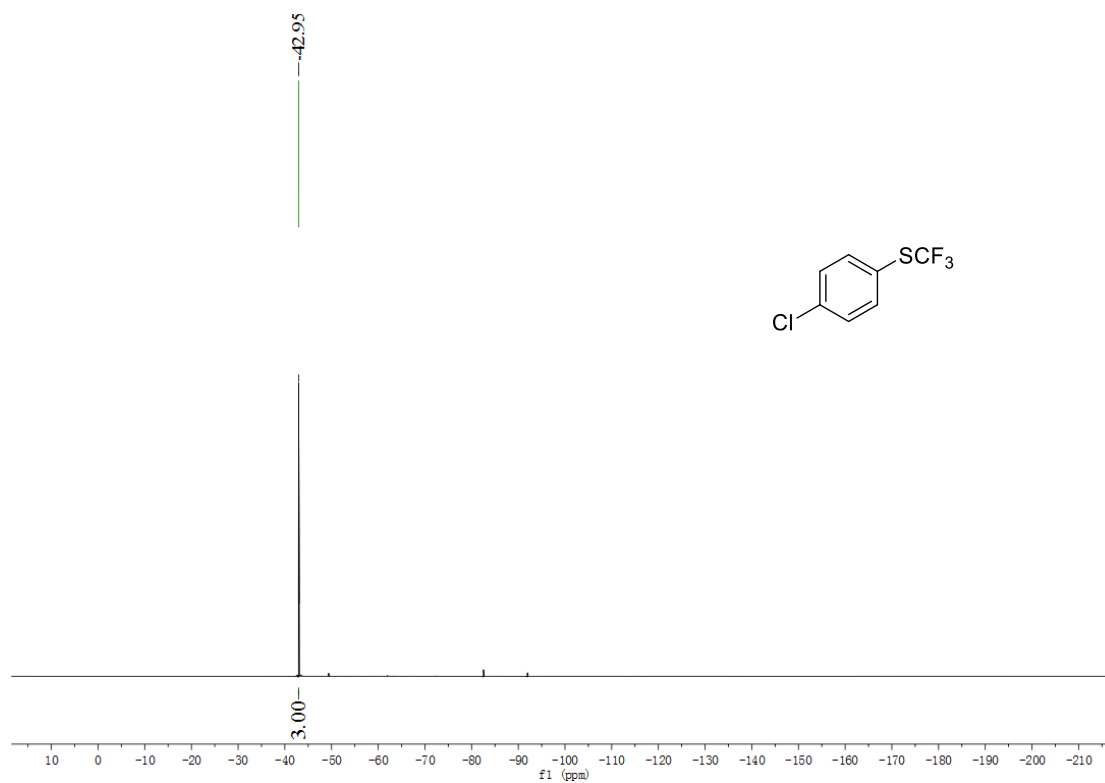

$^{13}\text{C}$  NMR spectrum of **2g** (101 MHz,  $\text{CDCl}_3$ )

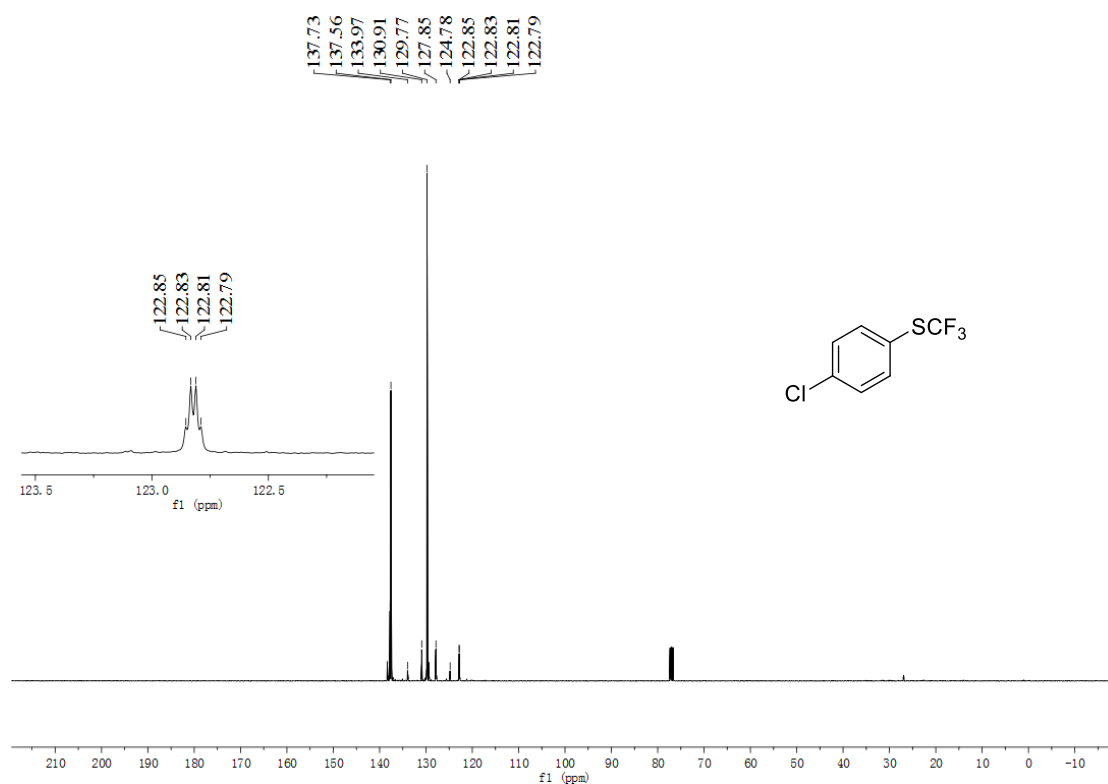

$^1\text{H}$  NMR spectrum of **2h** (400 MHz,  $\text{CDCl}_3$ )

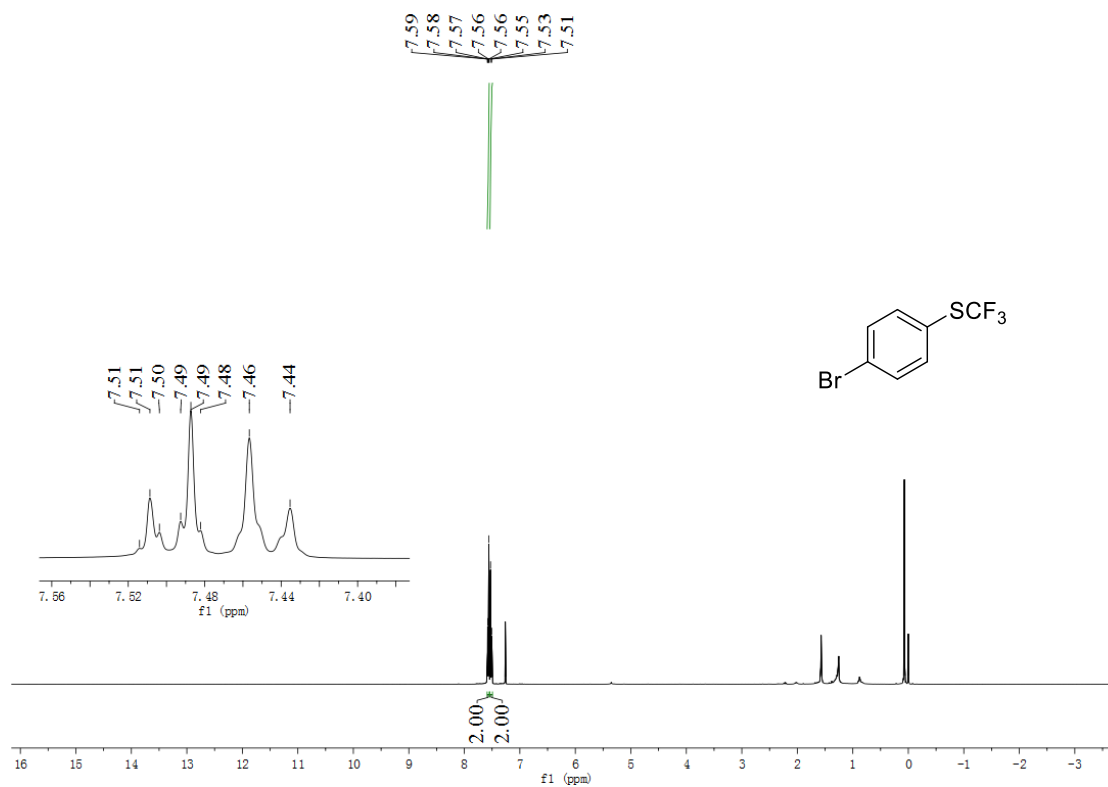

$^{19}\text{F}$  NMR spectrum of **2h** (376 MHz,  $\text{CDCl}_3$ )

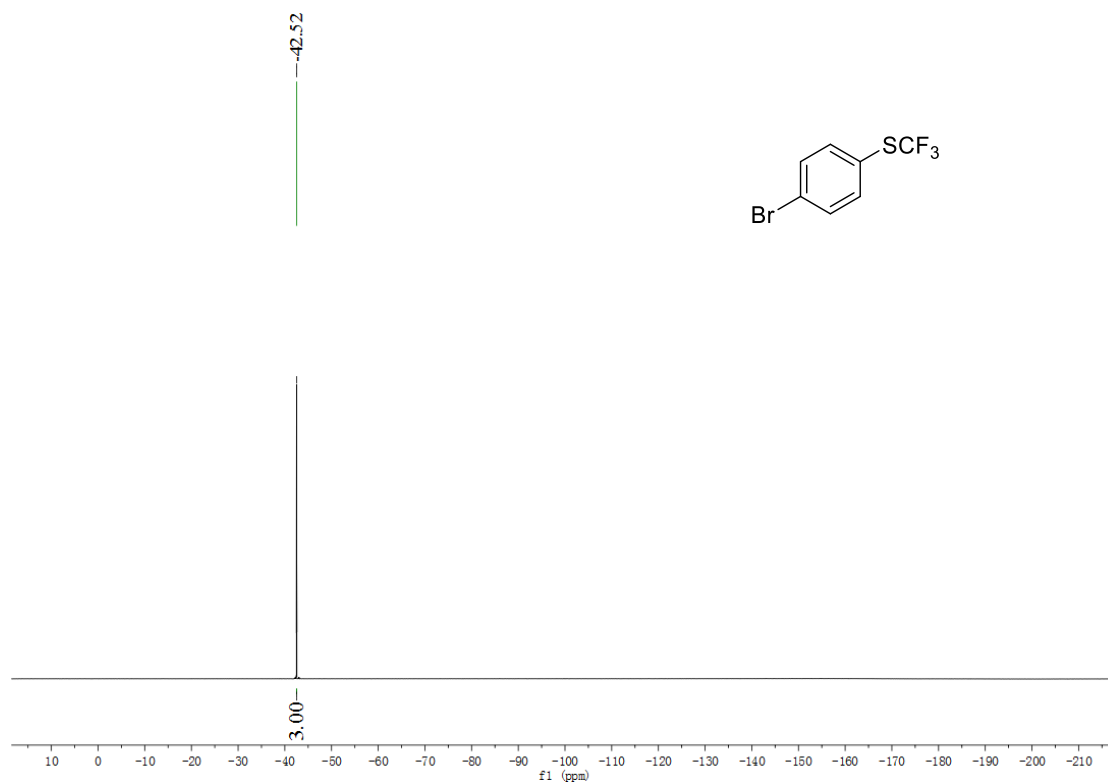

$^{13}\text{C}$  NMR spectrum of **2h** (101 MHz,  $\text{CDCl}_3$ )

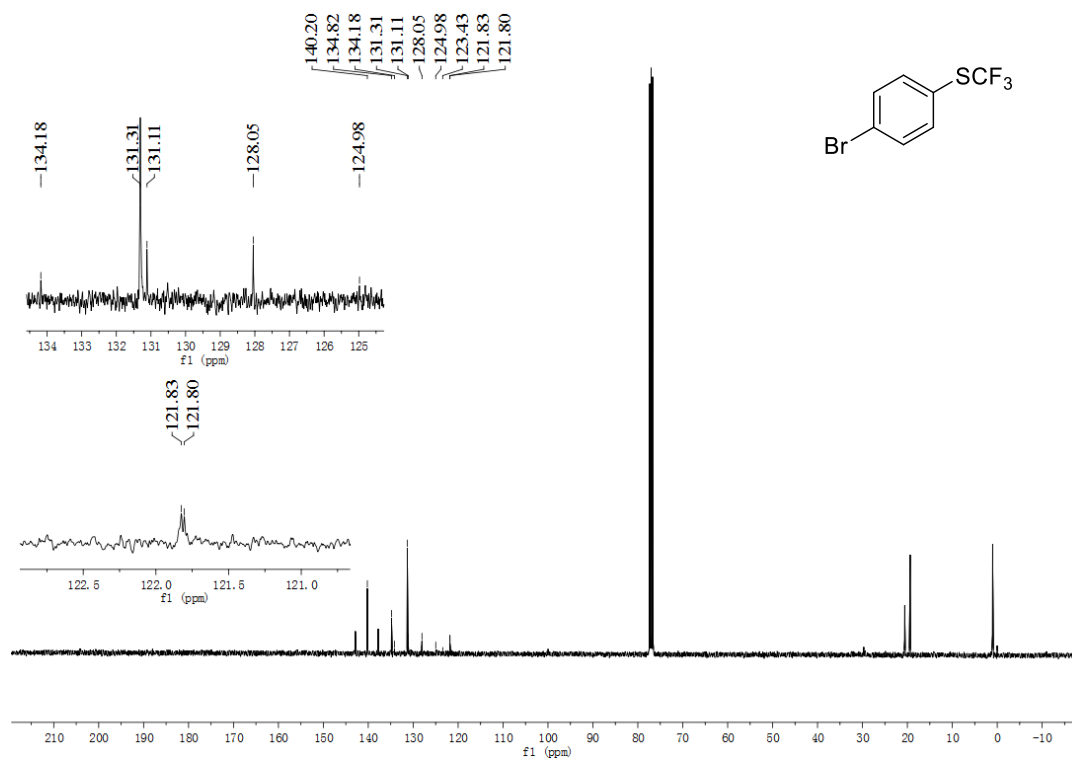

$^1\text{H}$  NMR spectrum of **2i** (400 MHz,  $\text{CDCl}_3$ )

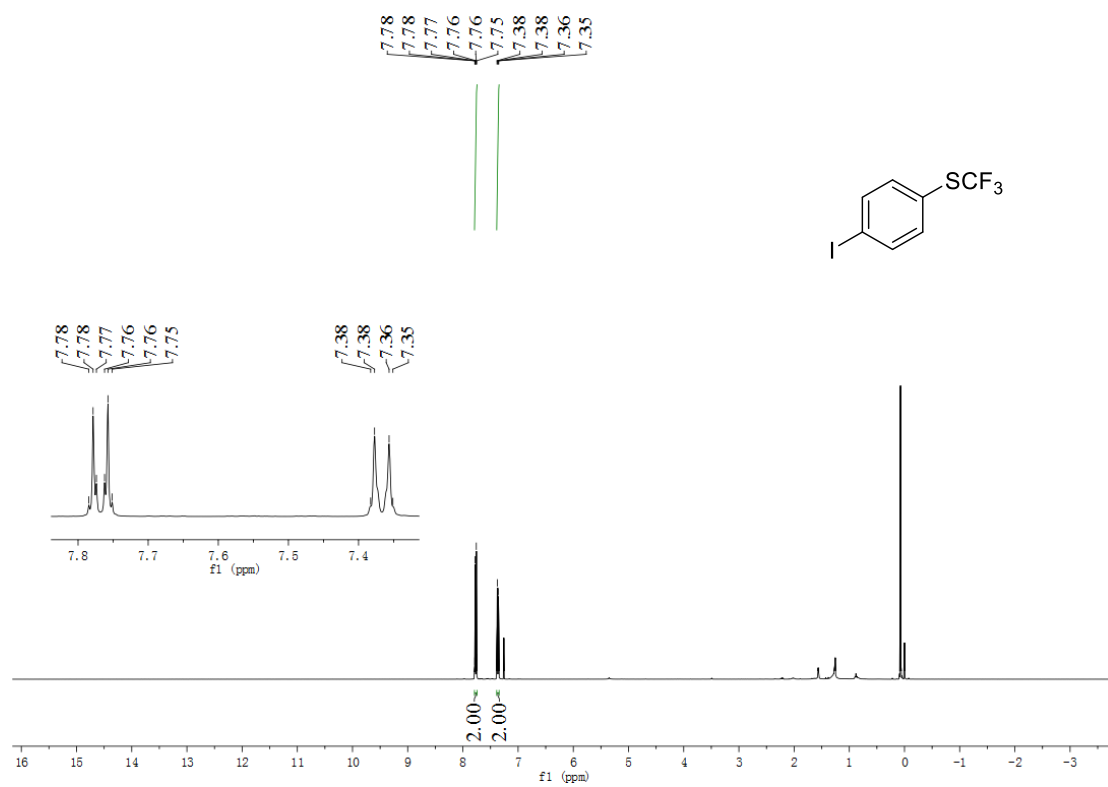

$^{19}\text{F}$  NMR spectrum of **2i** (376 MHz,  $\text{CDCl}_3$ )

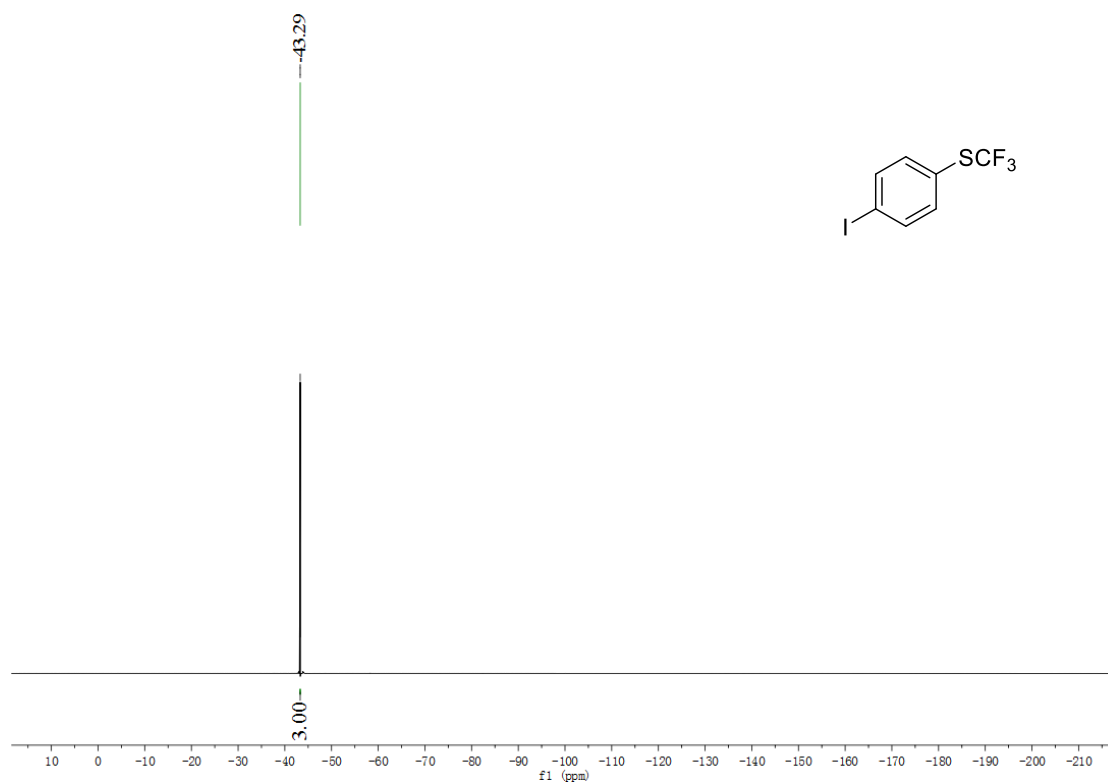



$^{13}\text{C}$  NMR spectrum of **2i** (101 MHz,  $\text{CDCl}_3$ )

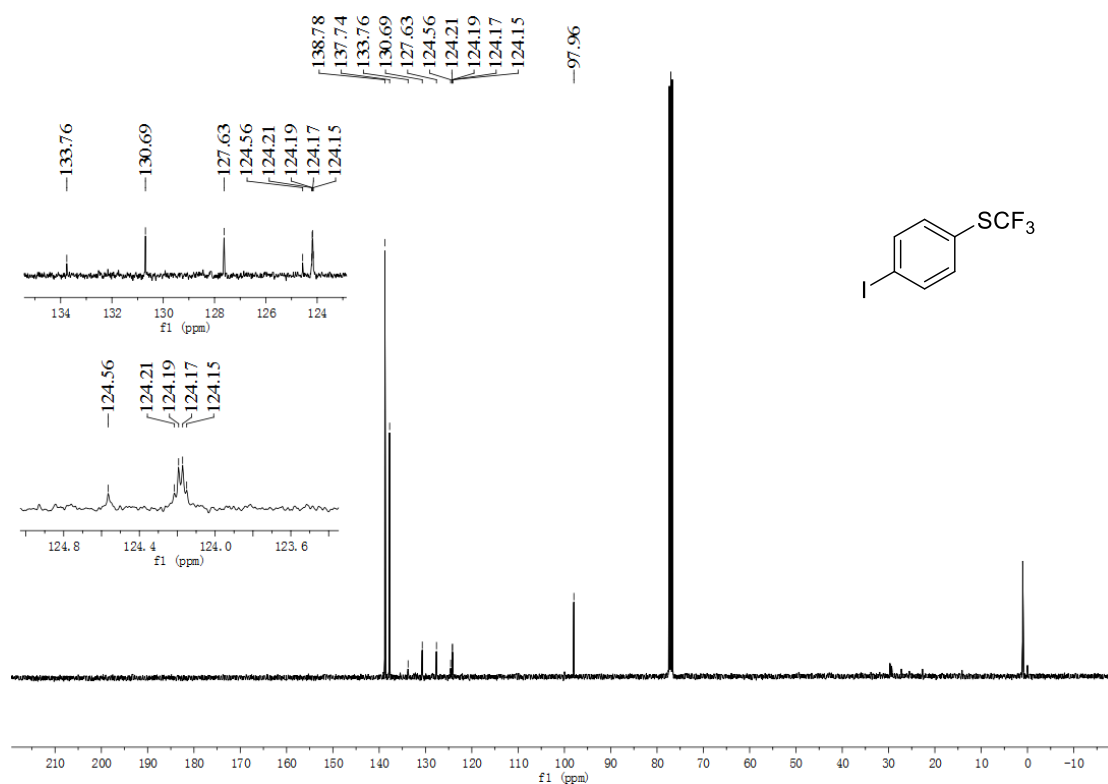

$^1\text{H}$  NMR spectrum of **2j** (400 MHz,  $\text{CDCl}_3$ )

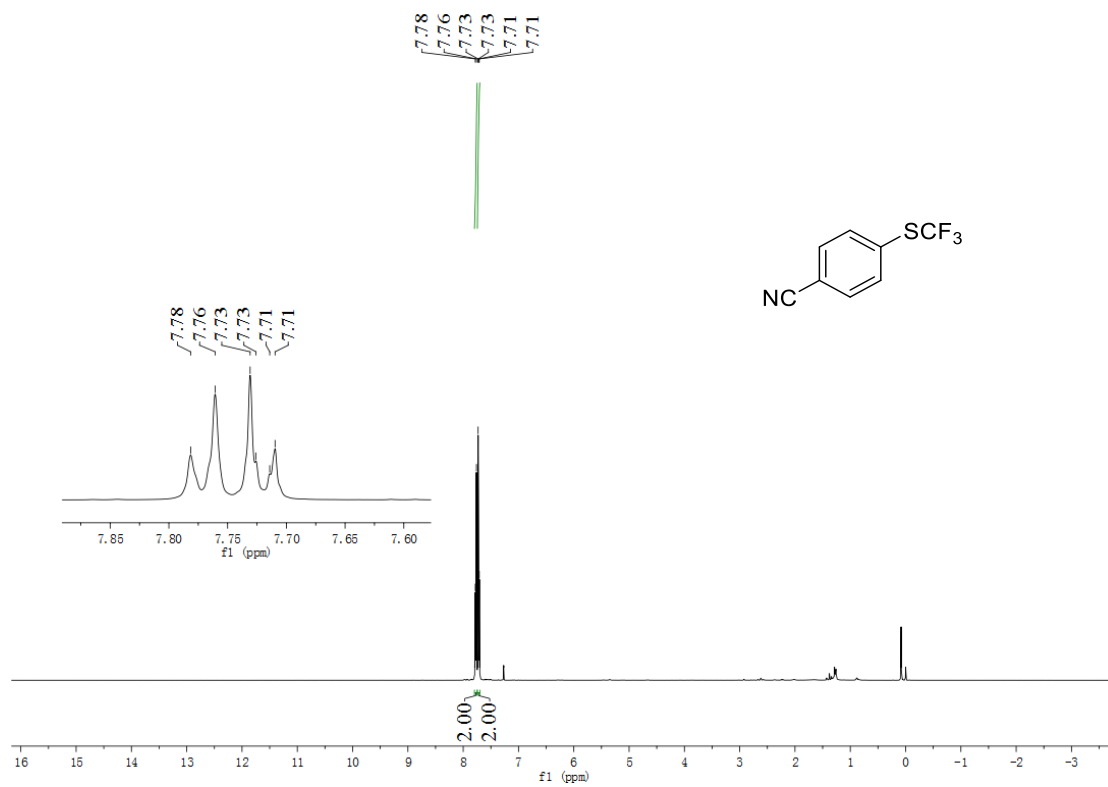

$^{19}\text{F}$  NMR spectrum of **2j** (376 MHz,  $\text{CDCl}_3$ )

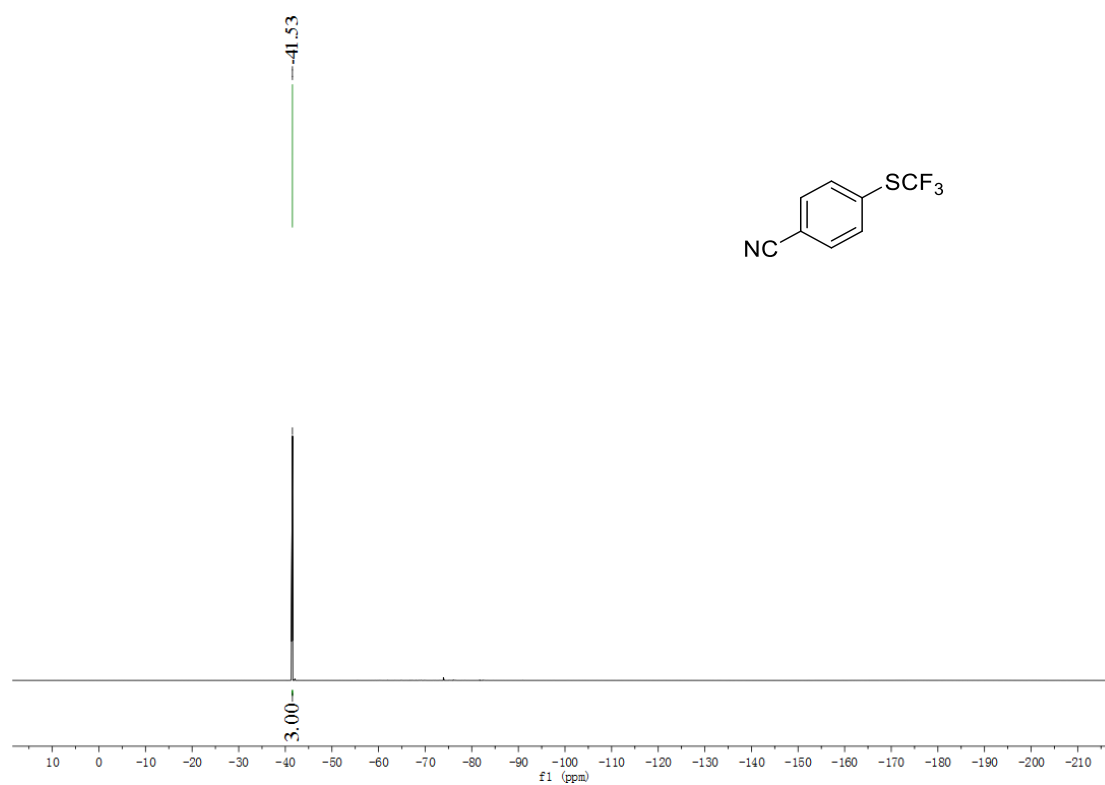

$^{13}\text{C}$  NMR spectrum of **2j** (101 MHz,  $\text{CDCl}_3$ )

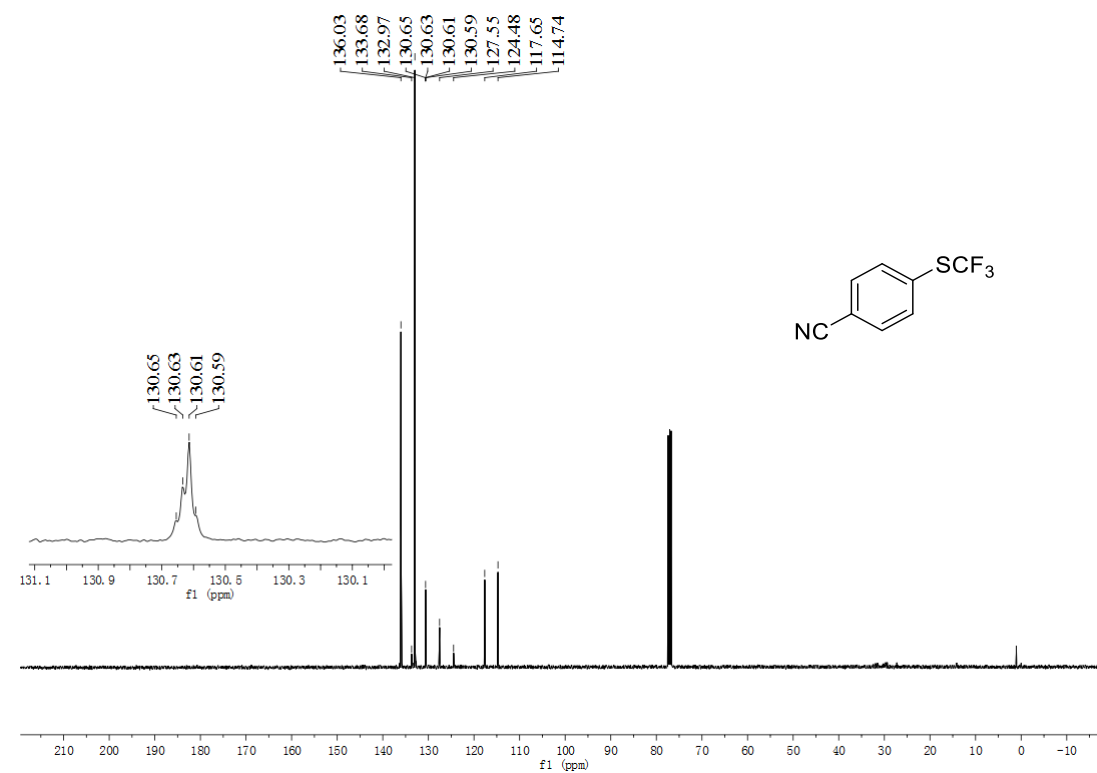

$^1\text{H}$  NMR spectrum of **2k** (400 MHz,  $\text{CDCl}_3$ )

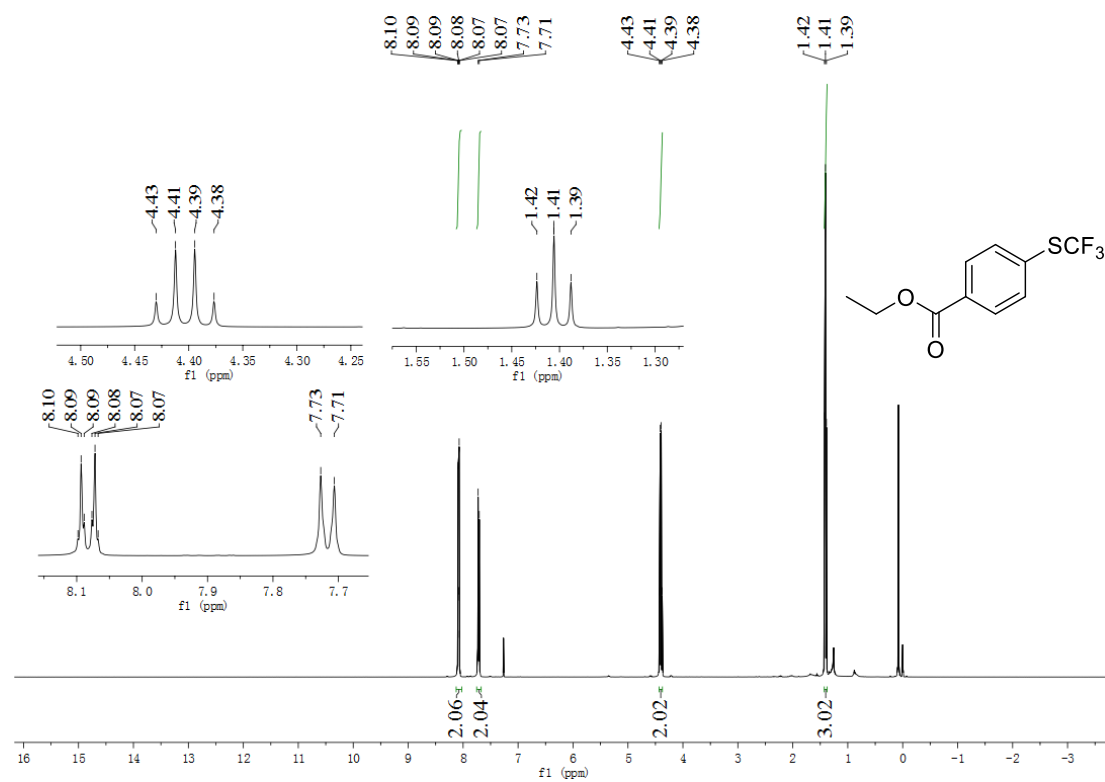

$^{19}\text{F}$  NMR spectrum of **2k** (376 MHz,  $\text{CDCl}_3$ )

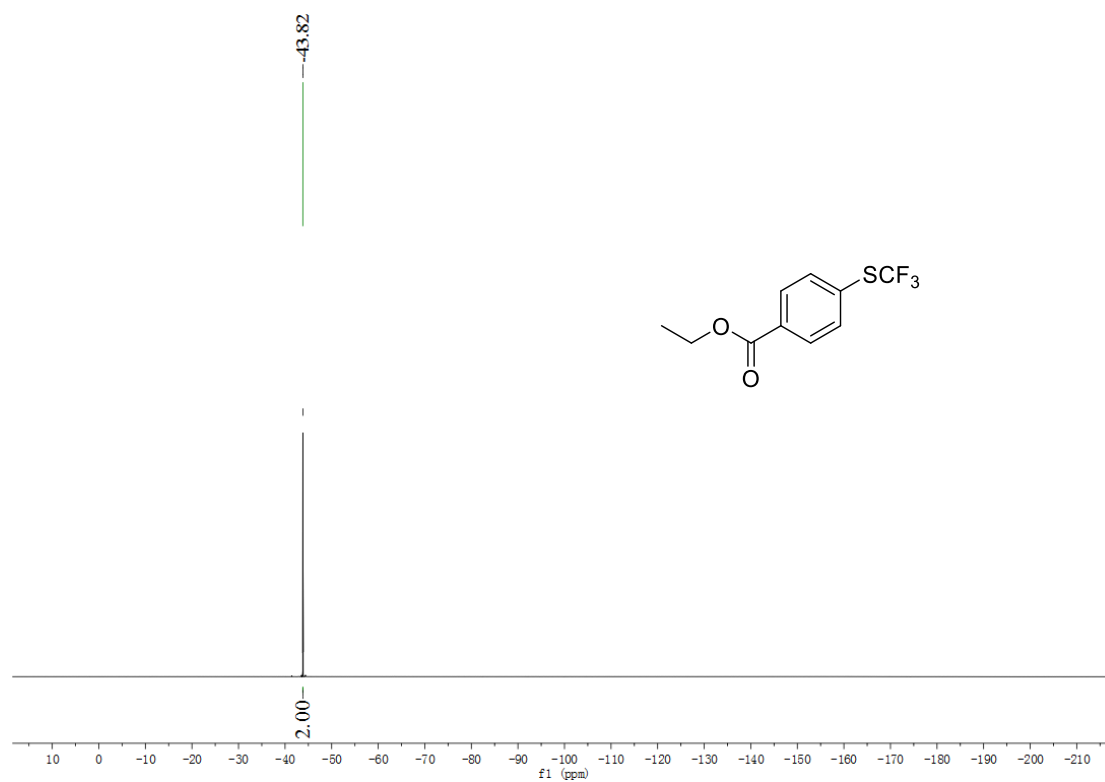

$^{13}\text{C}$  NMR spectrum of **2k** (101 MHz,  $\text{CDCl}_3$ )

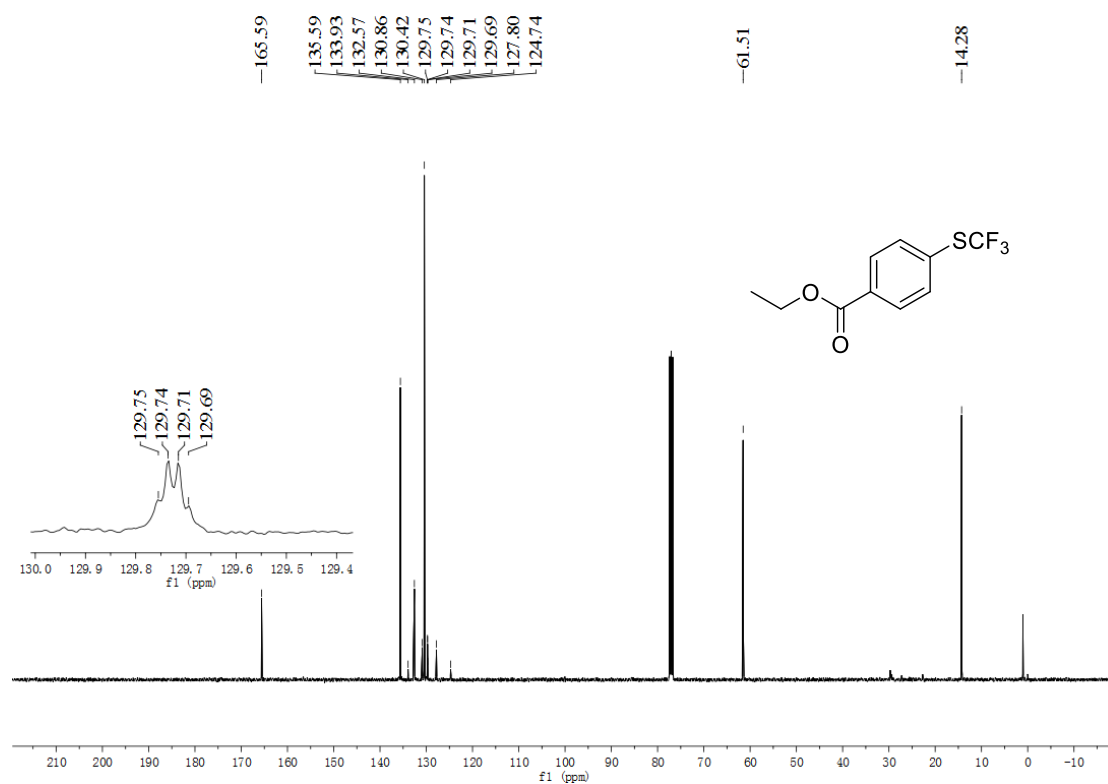

$^1\text{H}$  NMR spectrum of **2l** (400 MHz,  $\text{CDCl}_3$ )

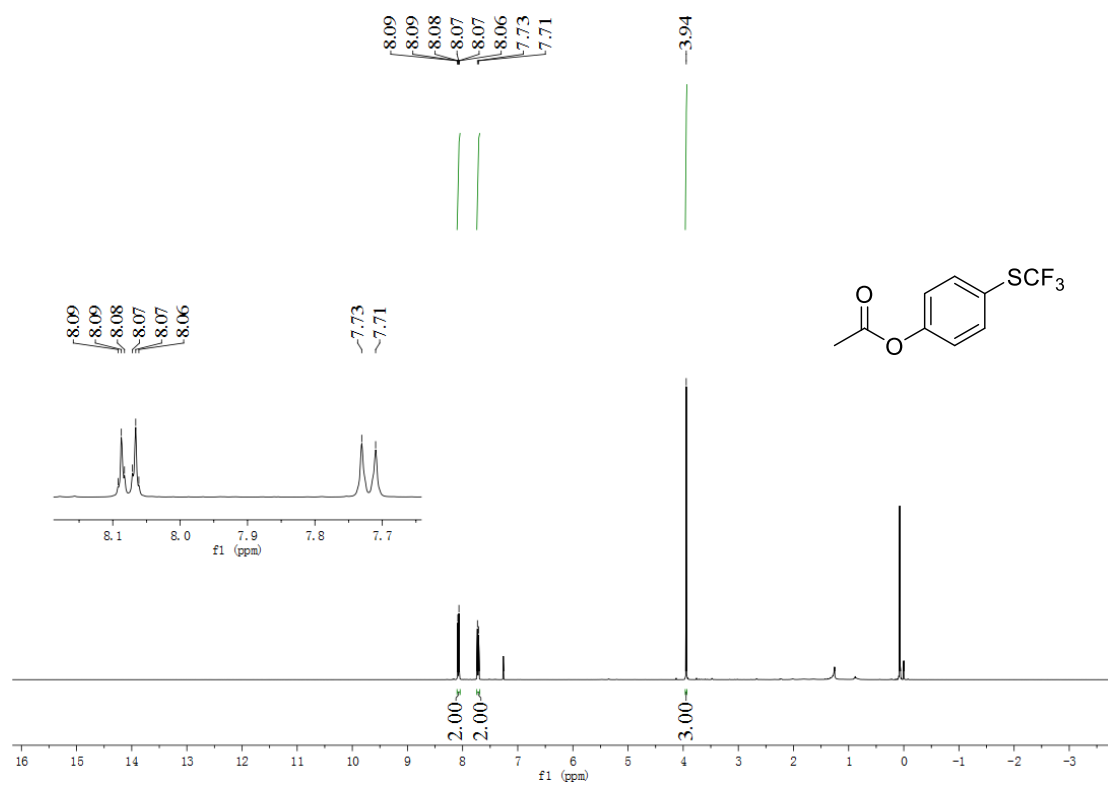

$^{19}\text{F}$  NMR spectrum of **2l** (376 MHz,  $\text{CDCl}_3$ )

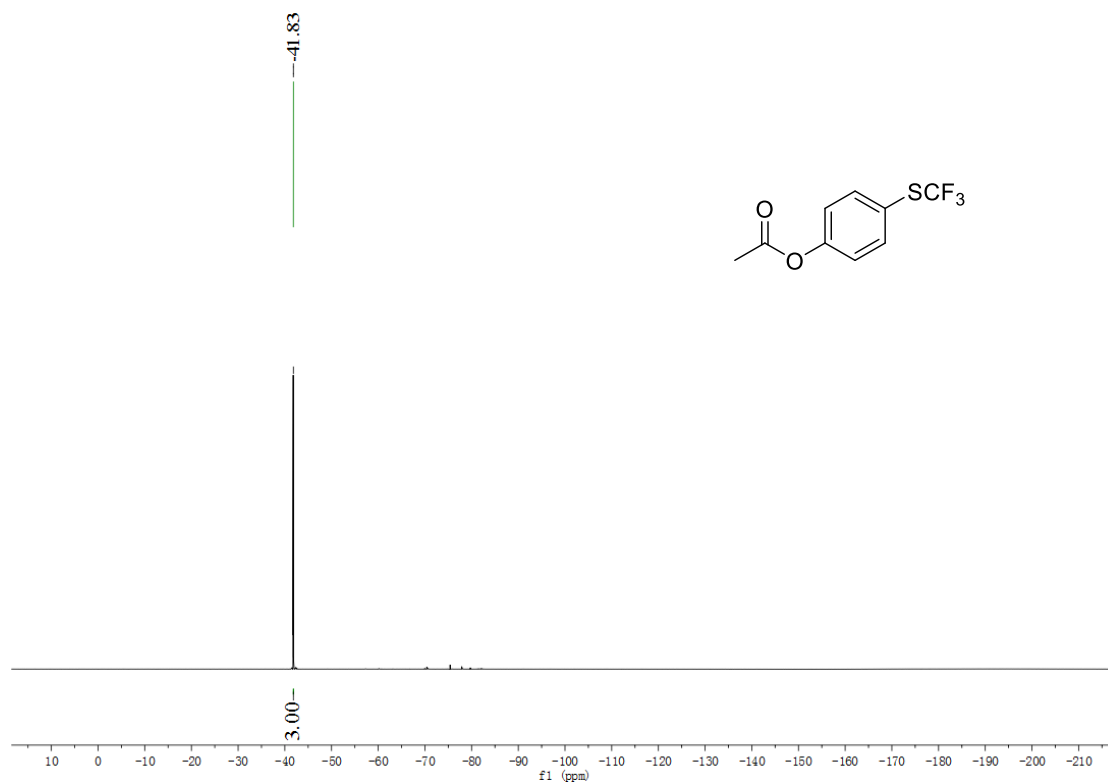

$^{13}\text{C}$  NMR spectrum of **2l** (101 MHz,  $\text{CDCl}_3$ )

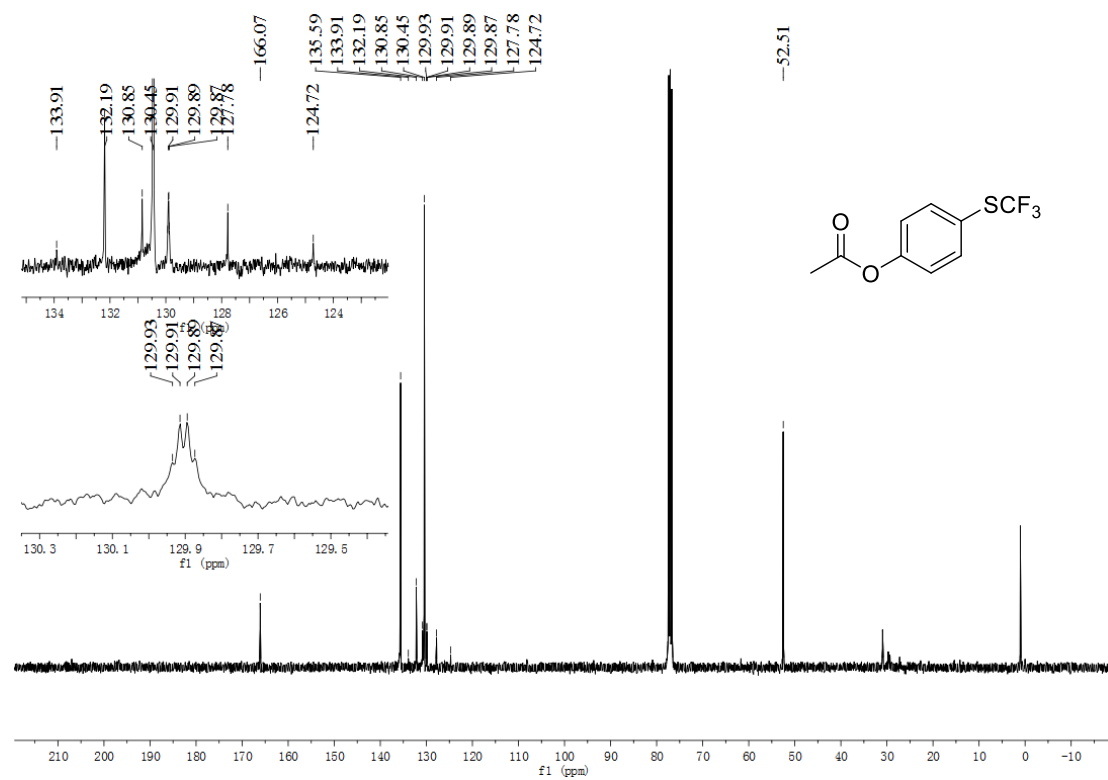

$^1\text{H}$  NMR spectrum of **2m** (400 MHz,  $\text{CDCl}_3$ )

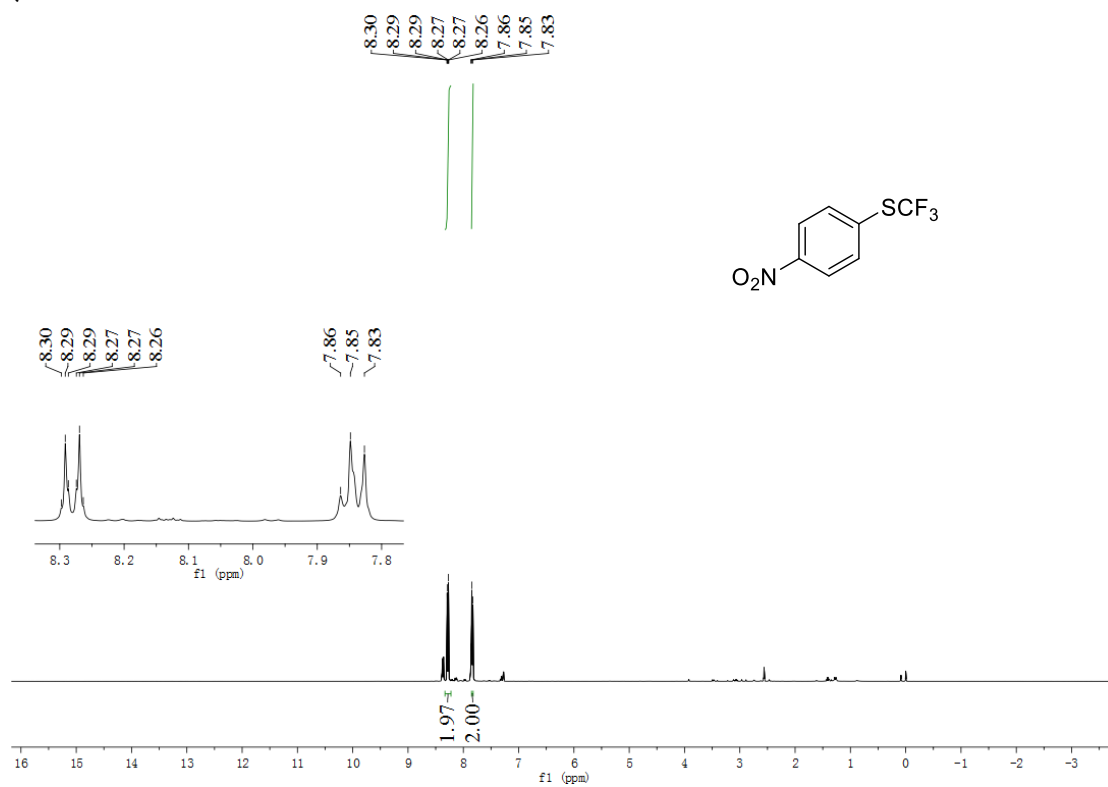

$^{19}\text{F}$  NMR spectrum of **2m** (376 MHz,  $\text{CDCl}_3$ )

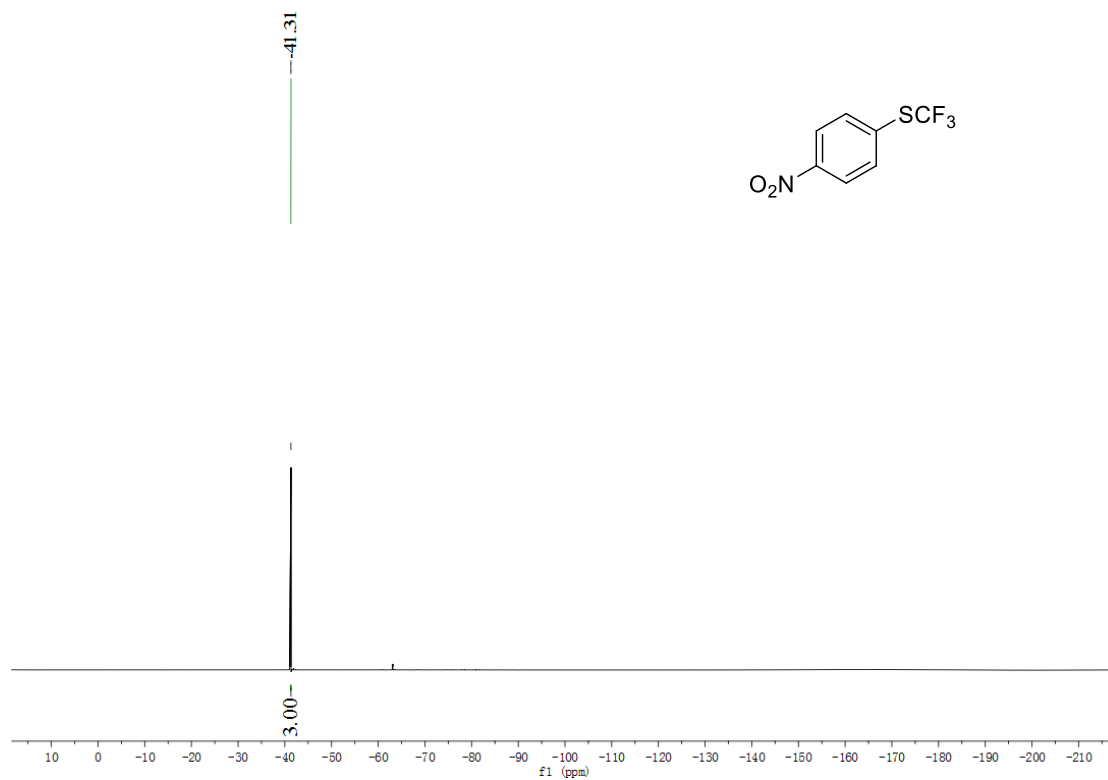

$^{13}\text{C}$  NMR spectrum of **2m** (101 MHz,  $\text{CDCl}_3$ )

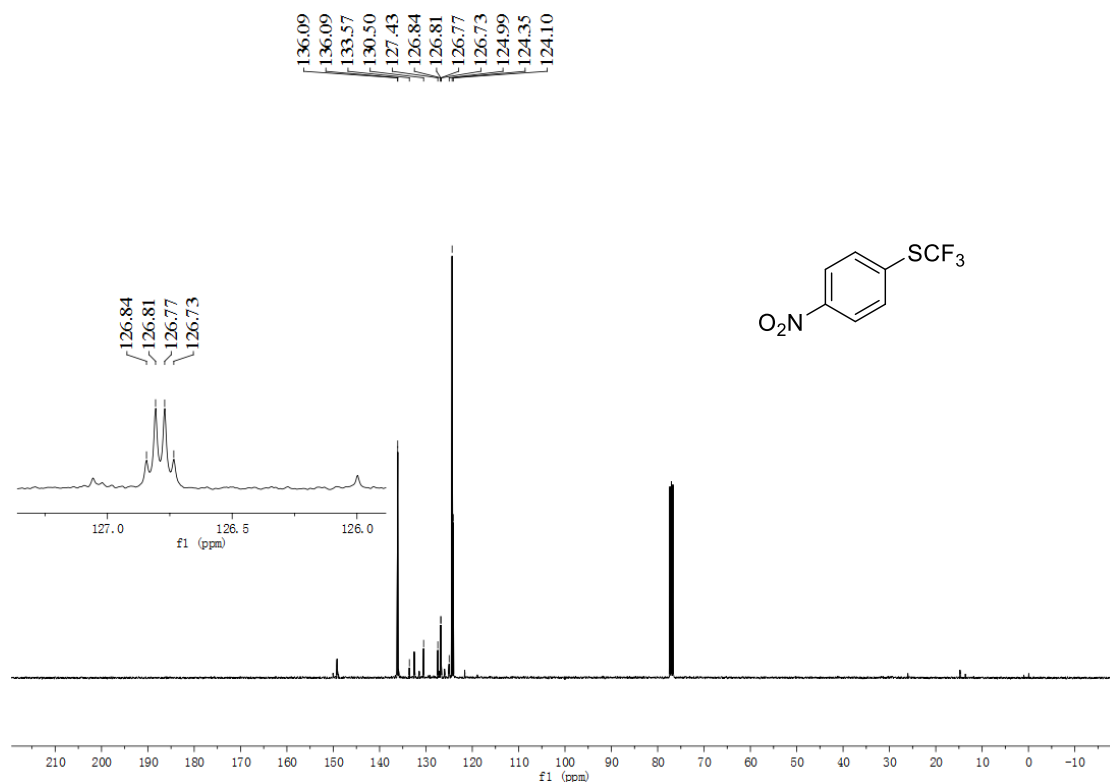

$^1\text{H}$  NMR spectrum of **2n** (400 MHz,  $\text{CDCl}_3$ )

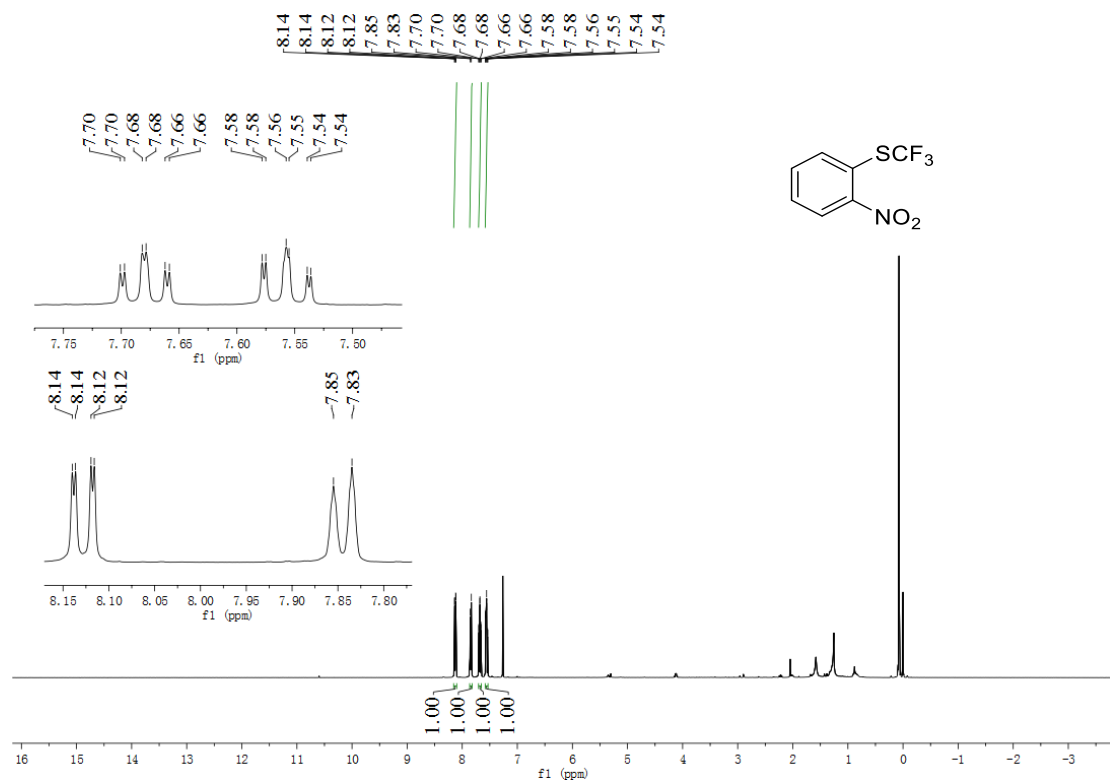

$^{19}\text{F}$  NMR spectrum of **2n** (376 MHz,  $\text{CDCl}_3$ )

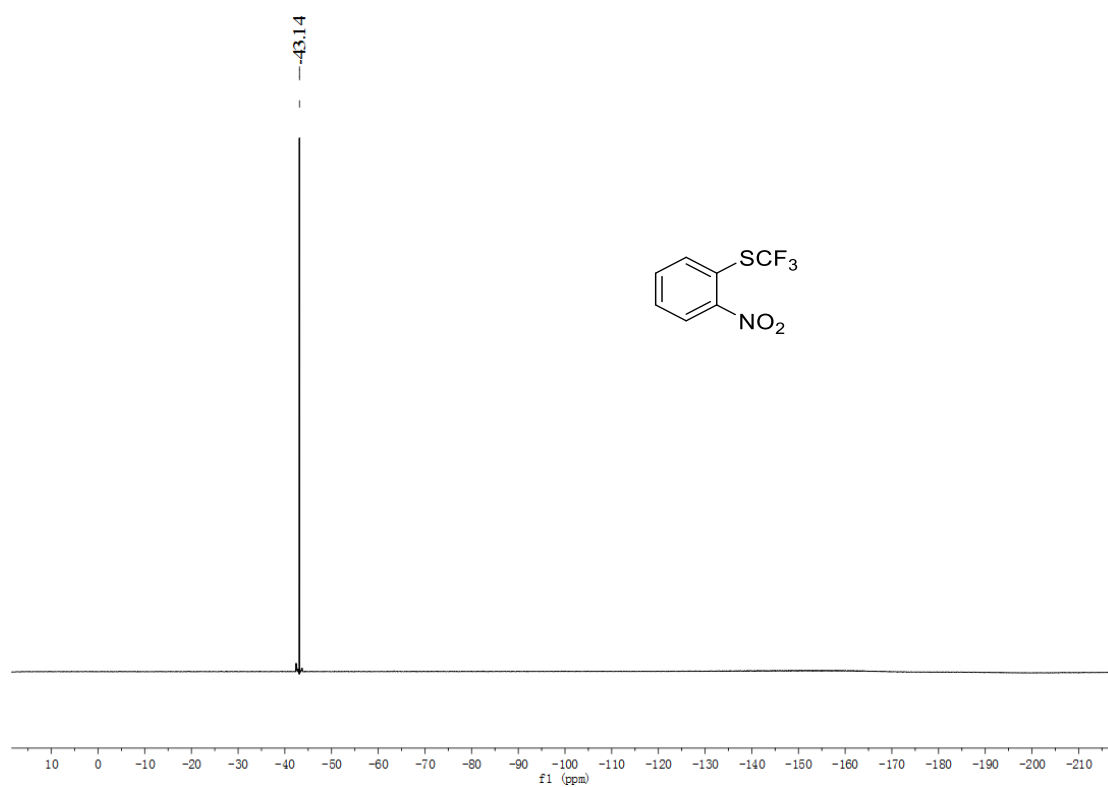

$^{13}\text{C}$  NMR spectrum of **2n** (101 MHz,  $\text{CDCl}_3$ )

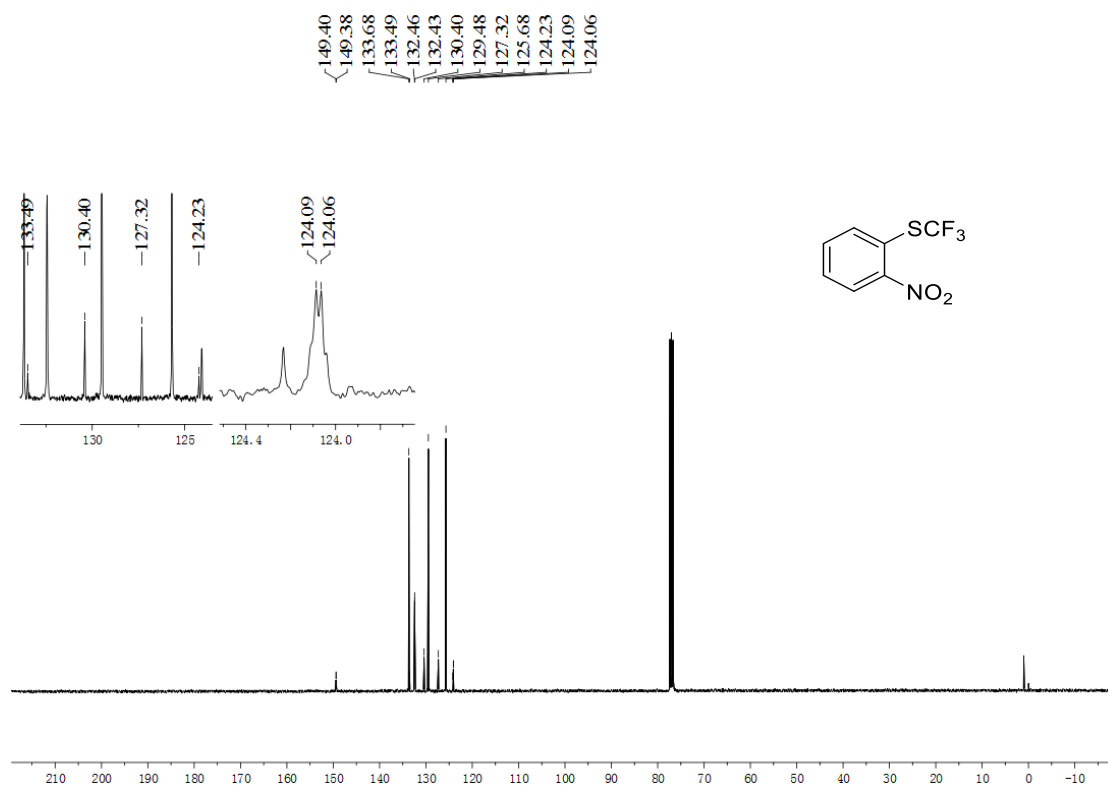



$^1\text{H}$  NMR spectrum of **2o** (400 MHz,  $\text{CDCl}_3$ )

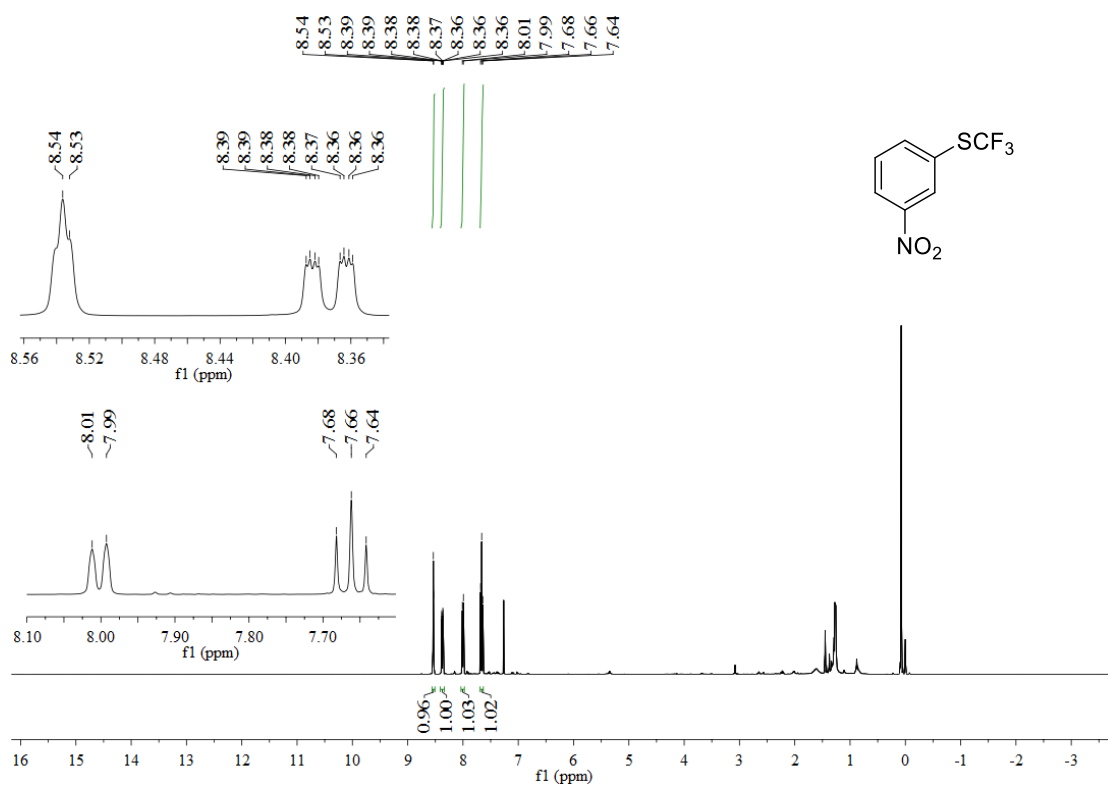

$^{19}\text{F}$  NMR spectrum of **2o** (376 MHz,  $\text{CDCl}_3$ )

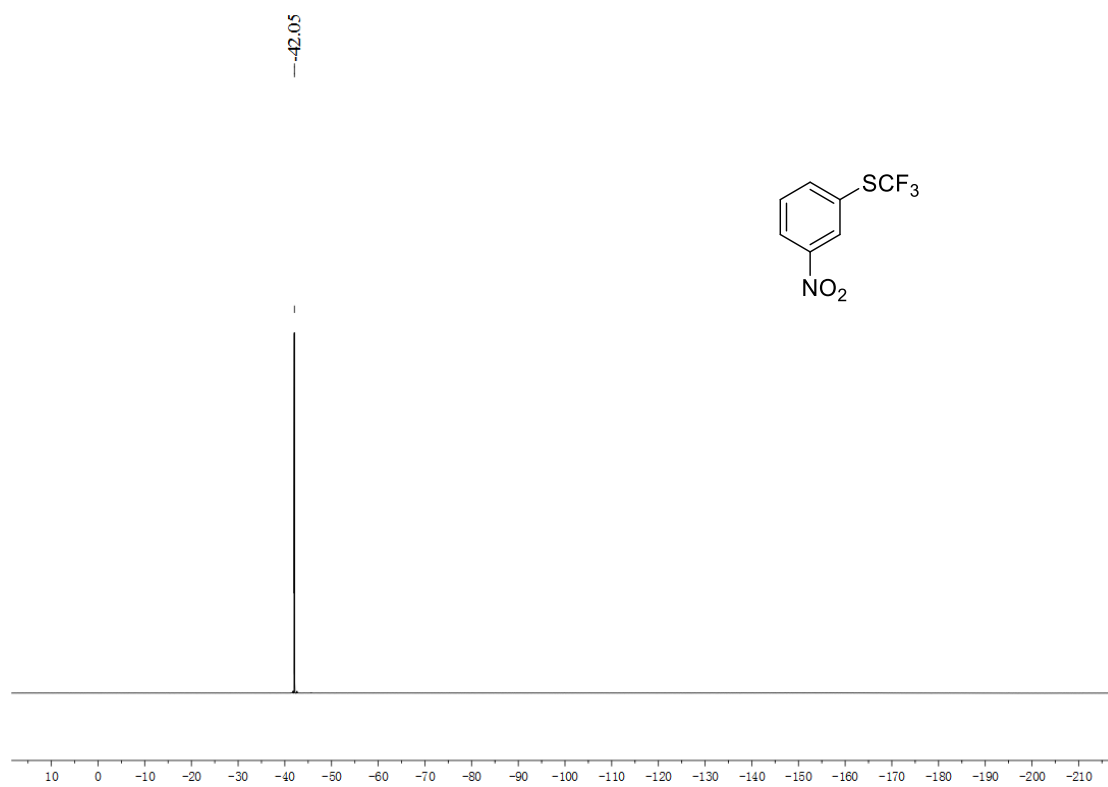

$^{13}\text{C}$  NMR spectrum of **2o** (101 MHz,  $\text{CDCl}_3$ )

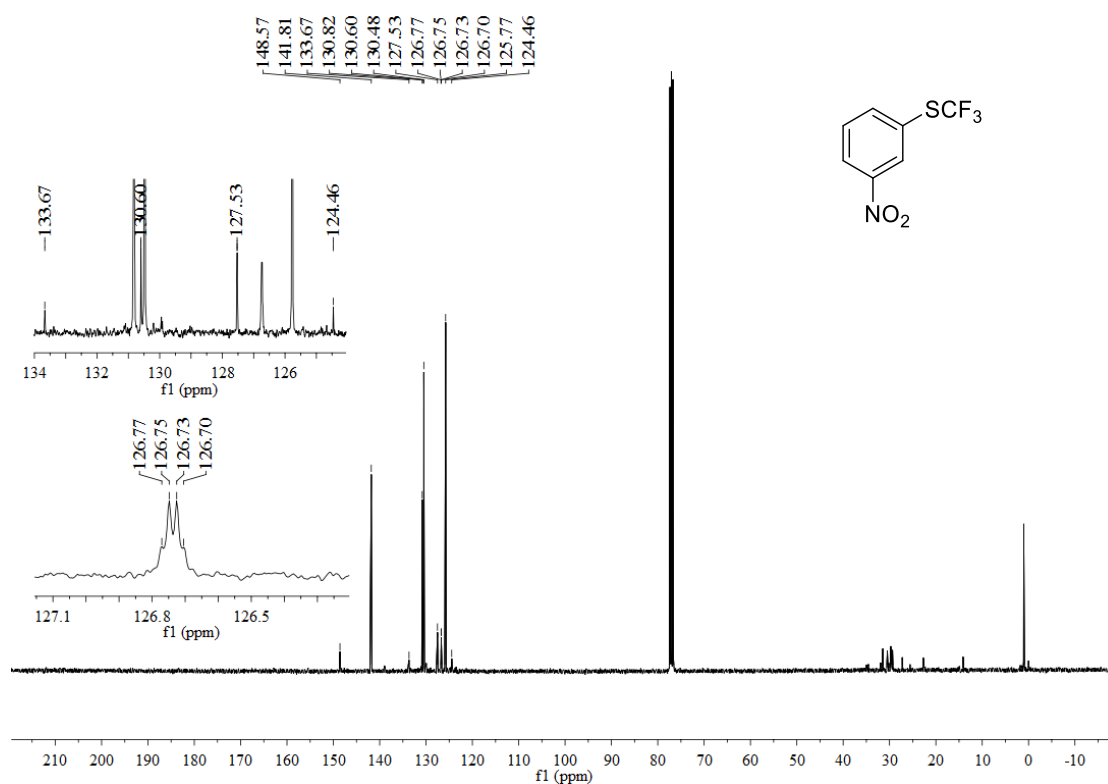

$^1\text{H}$  NMR spectrum of **2p** (400 MHz,  $\text{CDCl}_3$ )

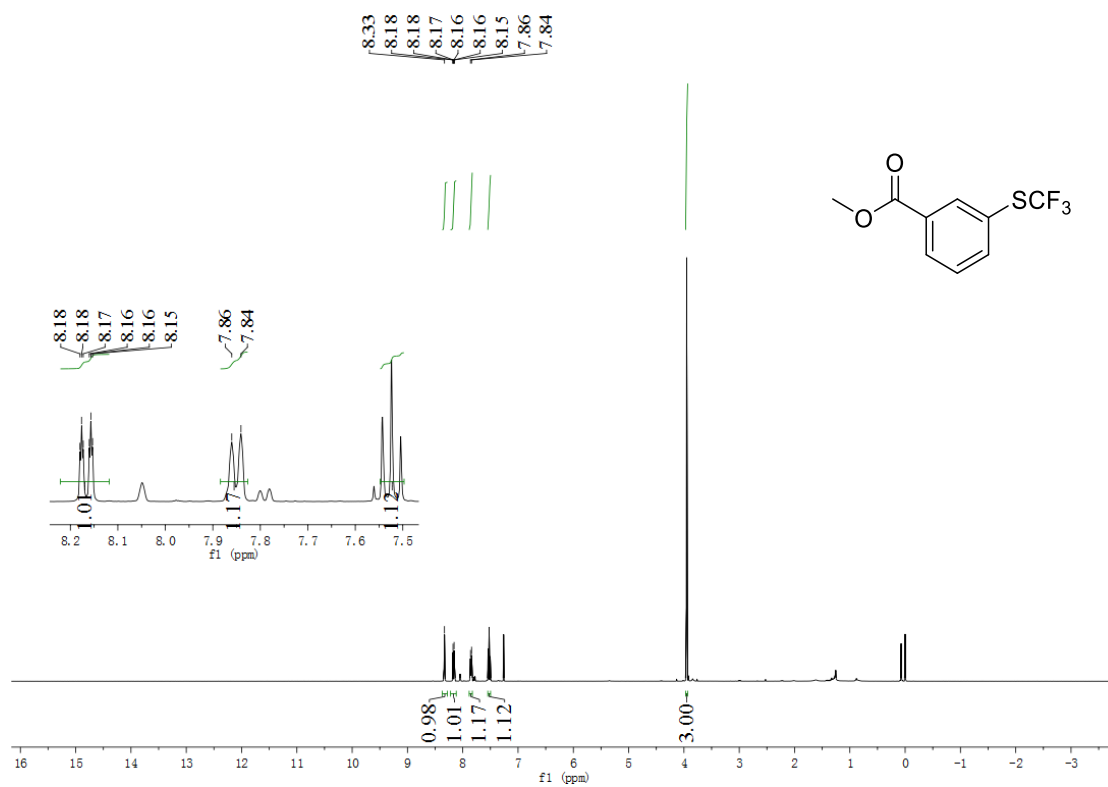

$^{19}\text{F}$  NMR spectrum of **2p** (376 MHz,  $\text{CDCl}_3$ )

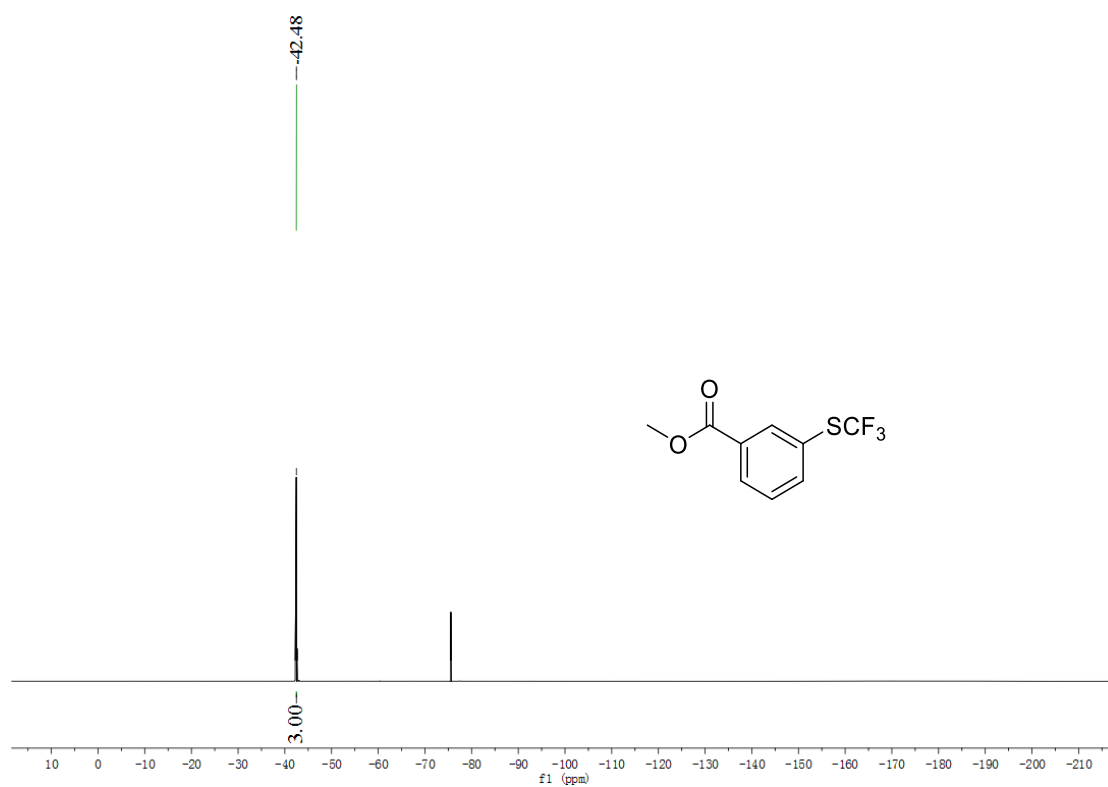

$^{13}\text{C}$  NMR spectrum of **2p** (101 MHz,  $\text{CDCl}_3$ )

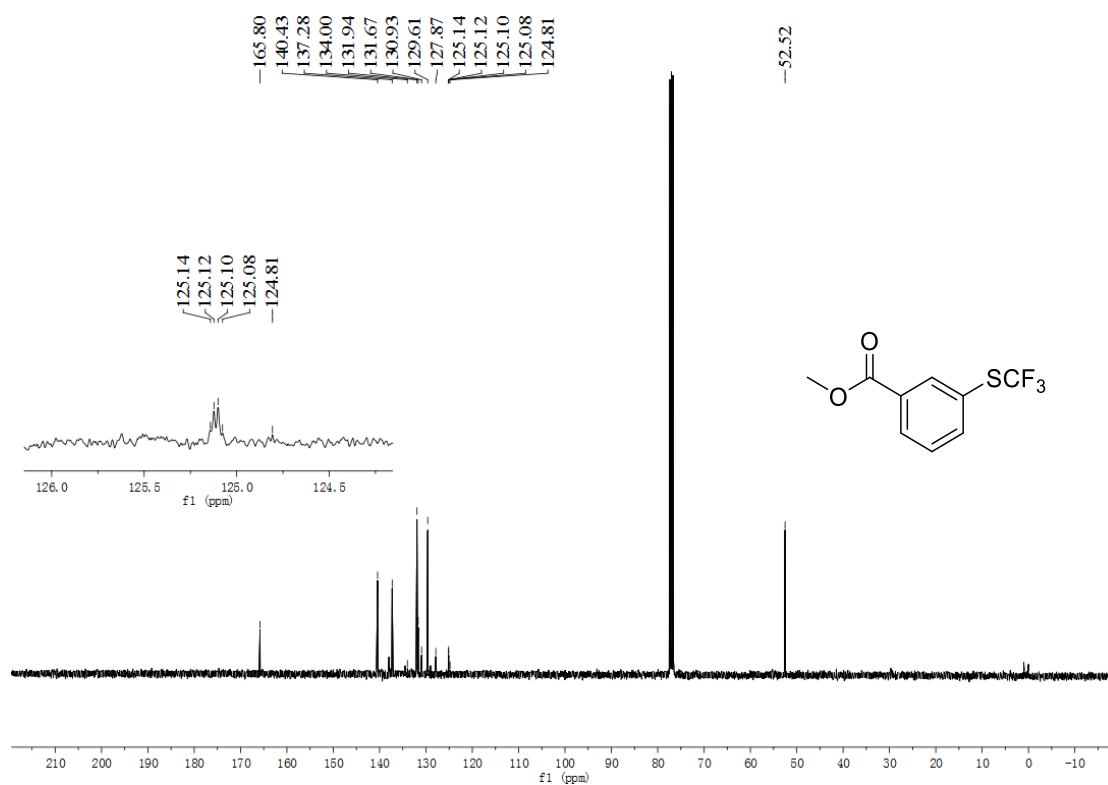

$^1\text{H}$  NMR spectrum of **2q** (400 MHz,  $\text{CDCl}_3$ )

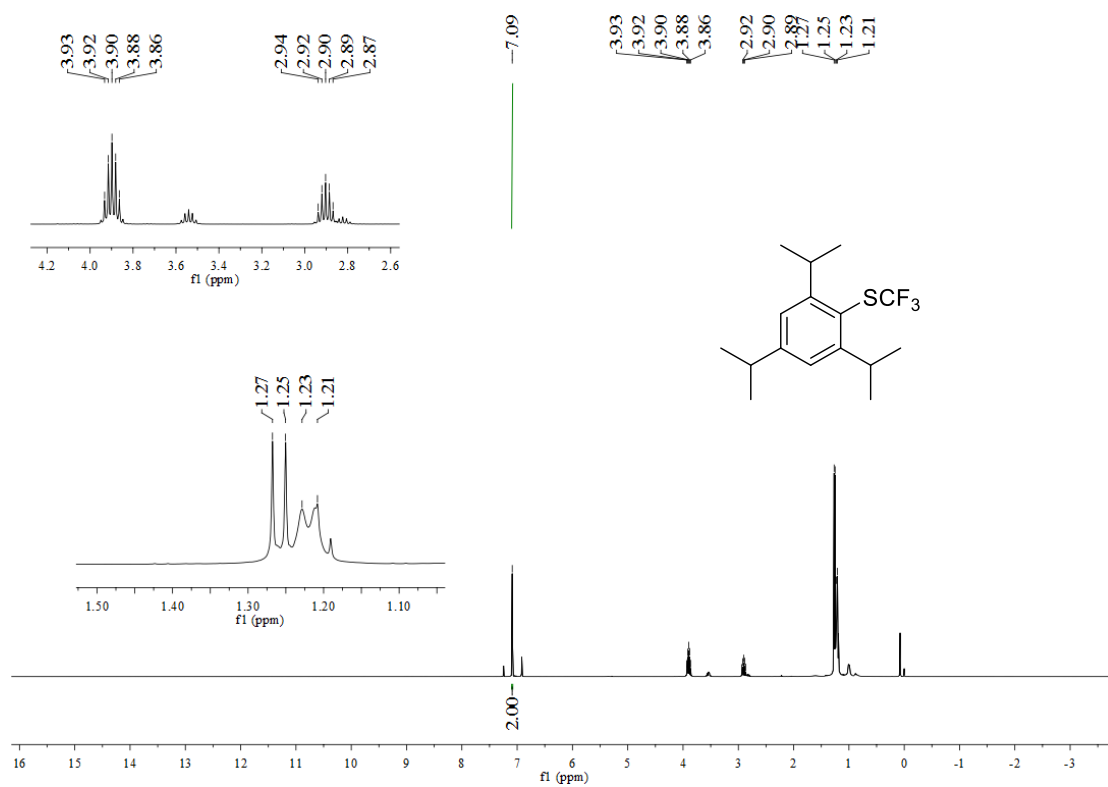

$^{19}\text{F}$  NMR spectrum of **2q** (376 MHz,  $\text{CDCl}_3$ )

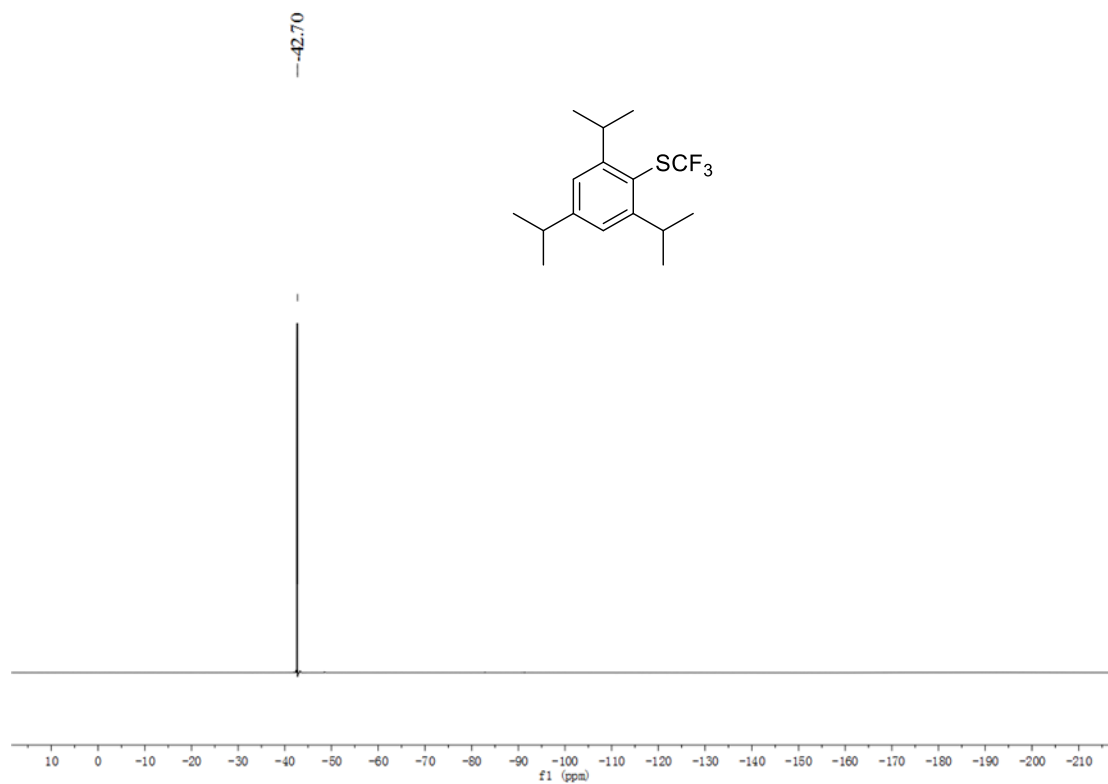

$^{13}\text{C}$  NMR spectrum of **2q** (101 MHz,  $\text{CDCl}_3$ )

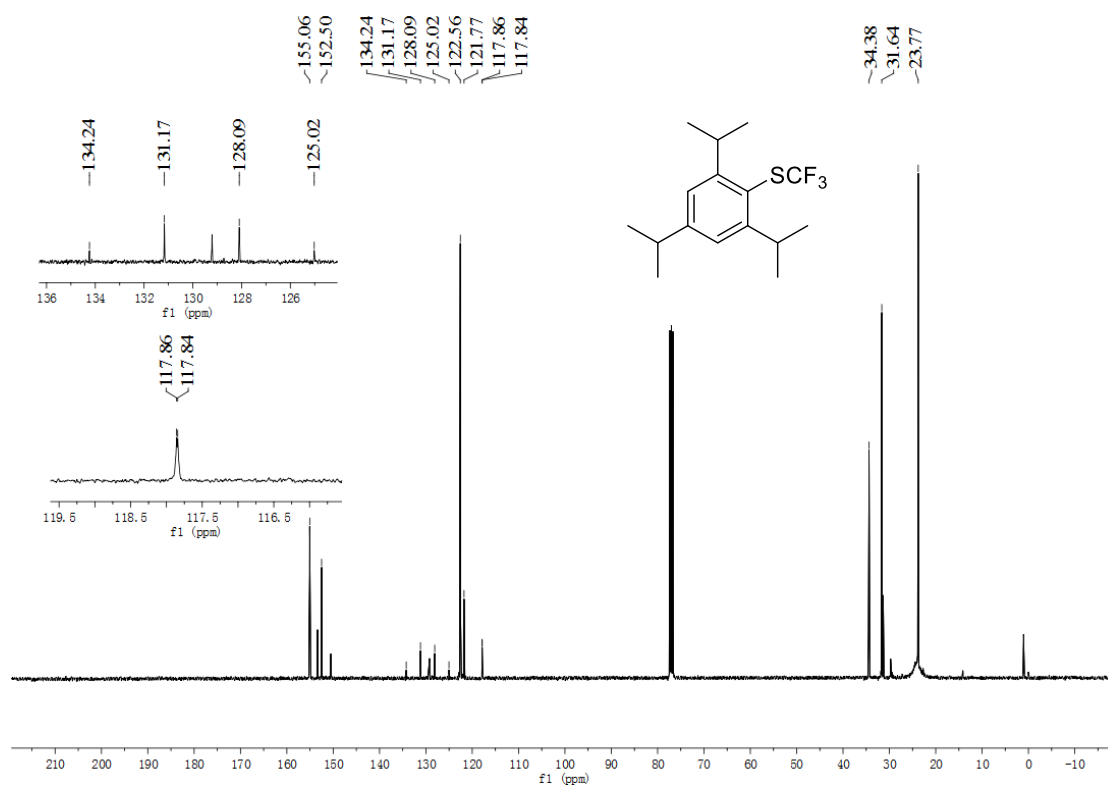

$^1\text{H}$  NMR spectrum of **2r** (400 MHz,  $\text{CDCl}_3$ )

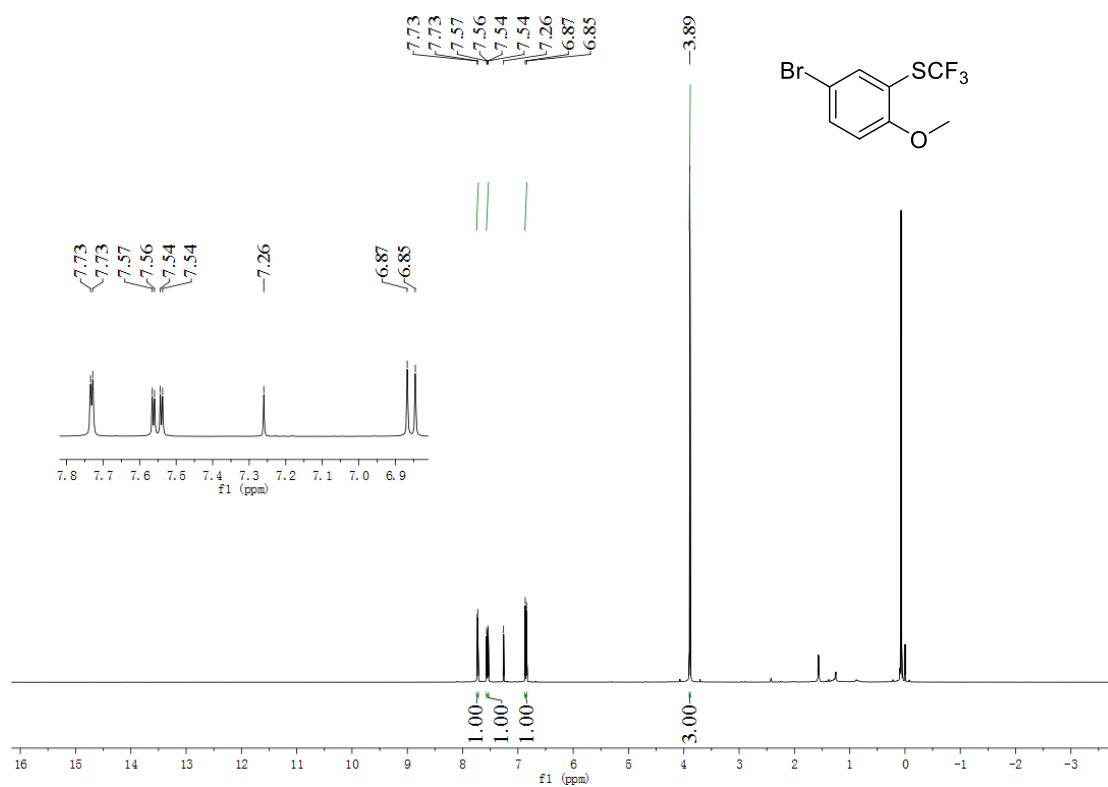

$^{19}\text{F}$  NMR spectrum of **2r** (376 MHz,  $\text{CDCl}_3$ )

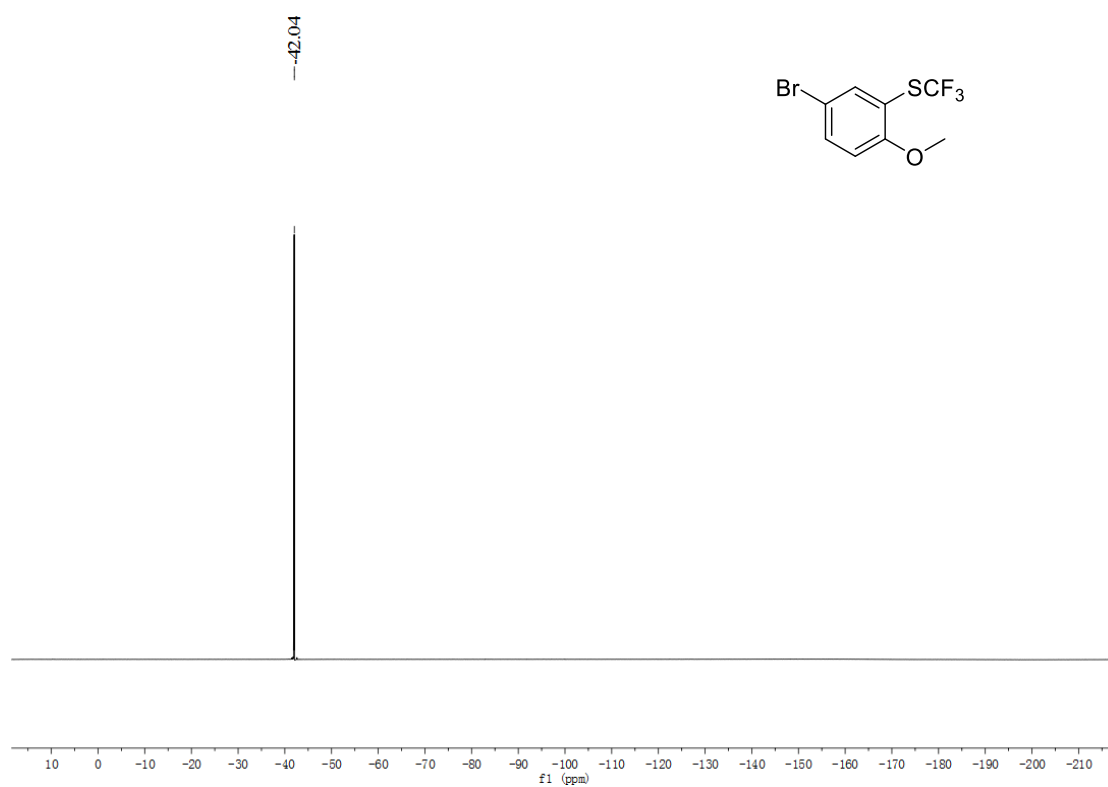

$^{13}\text{C}$  NMR spectrum of **2r** (101 MHz,  $\text{CDCl}_3$ )

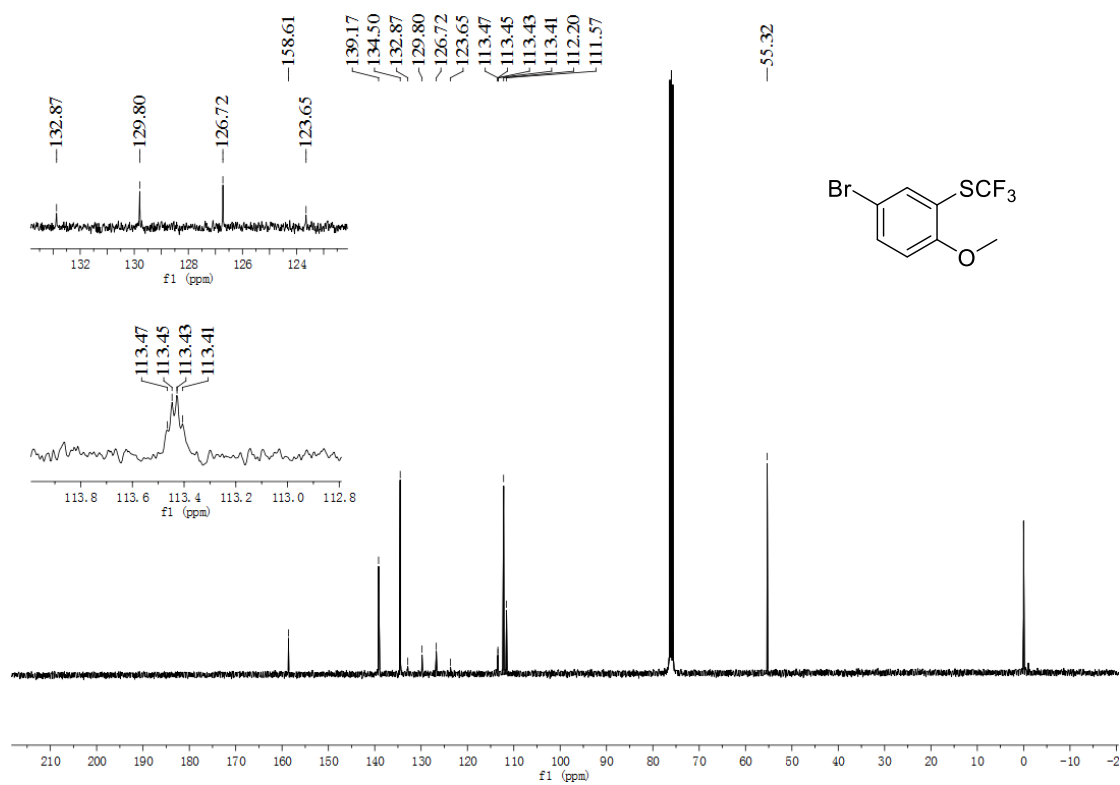

$^1\text{H}$  NMR spectrum of **2s** (400 MHz,  $\text{CDCl}_3$ )

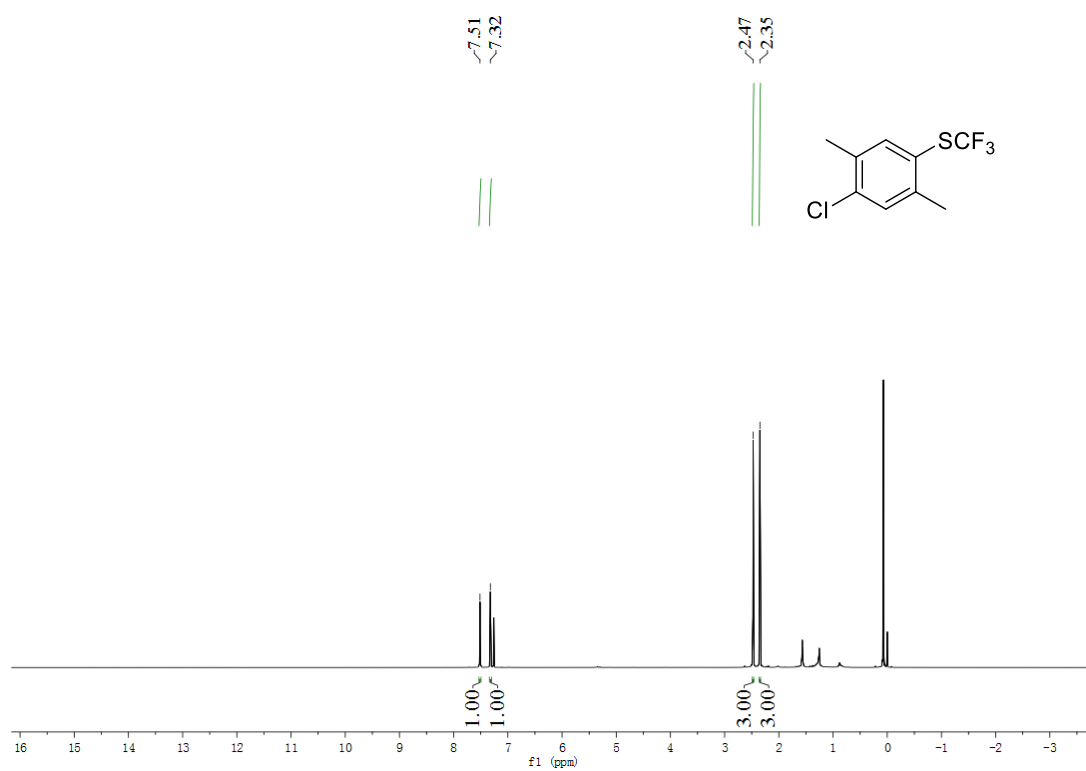

$^{19}\text{F}$  NMR spectrum of **2s** (376 MHz,  $\text{CDCl}_3$ )

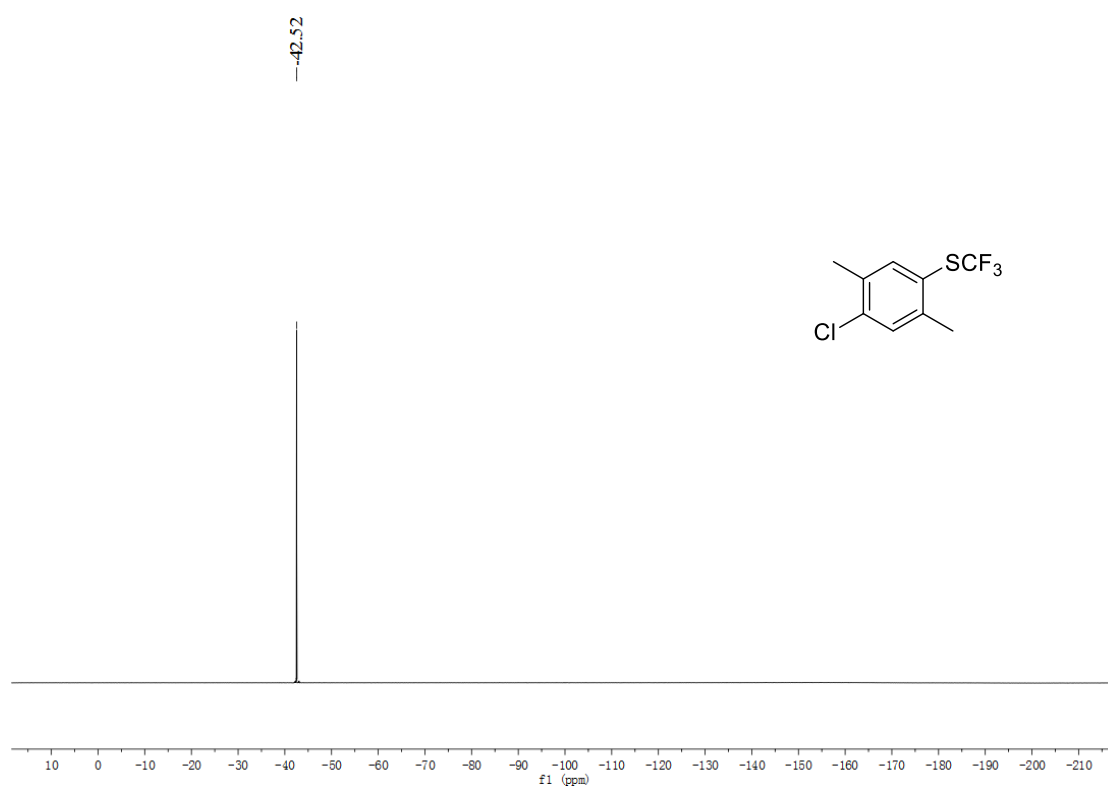

$^{13}\text{C}$  NMR spectrum of **2s** (101 MHz,  $\text{CDCl}_3$ )

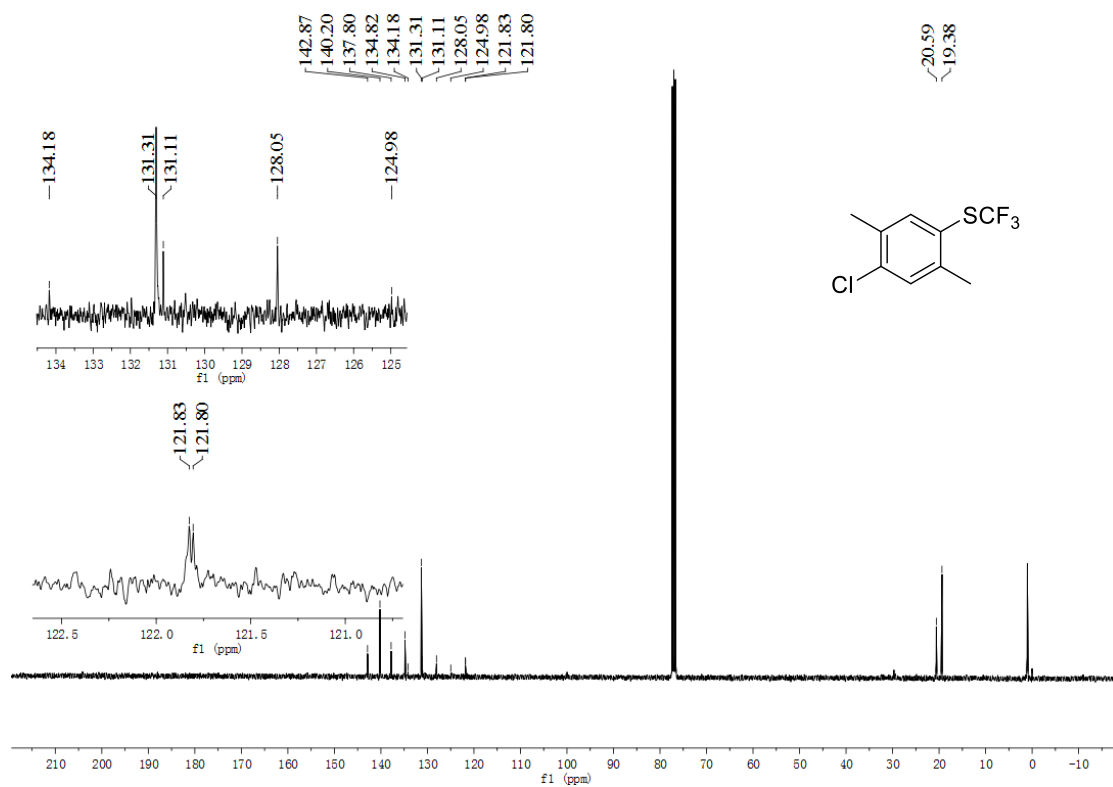

$^1\text{H}$  NMR spectrum of **2t** (400 MHz,  $\text{CDCl}_3$ )

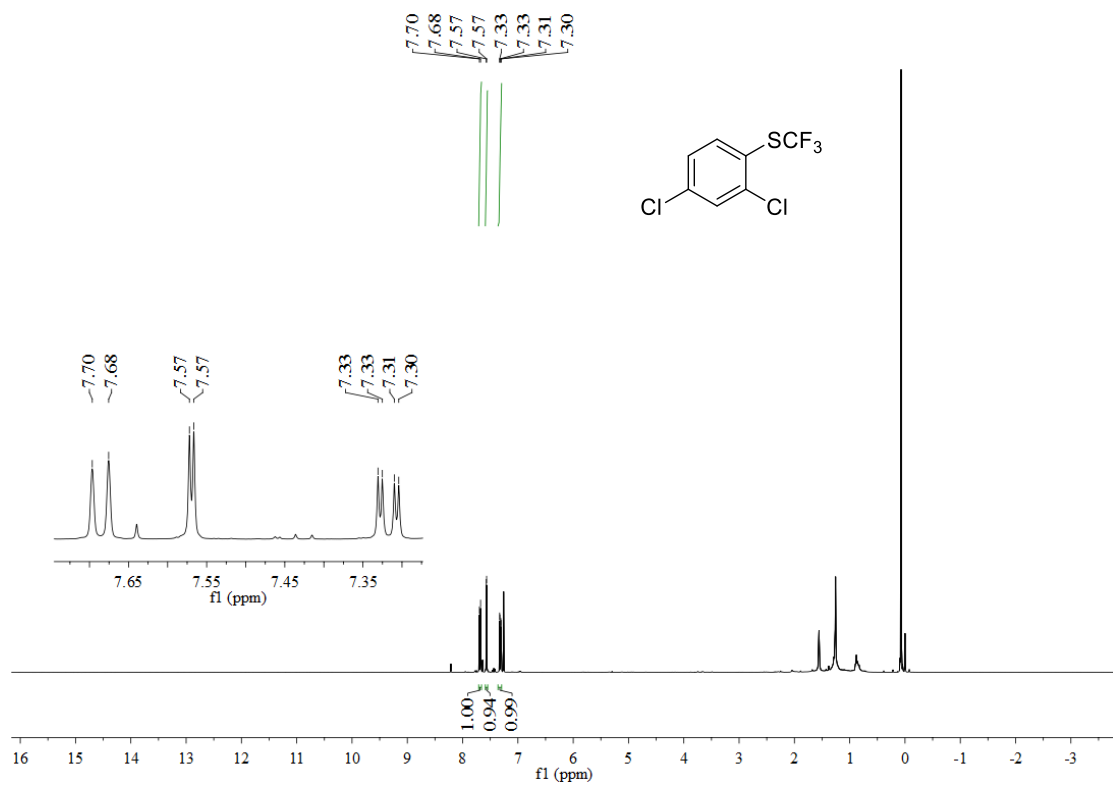



$^{19}\text{F}$  NMR spectrum of **2t** (376 MHz,  $\text{CDCl}_3$ )

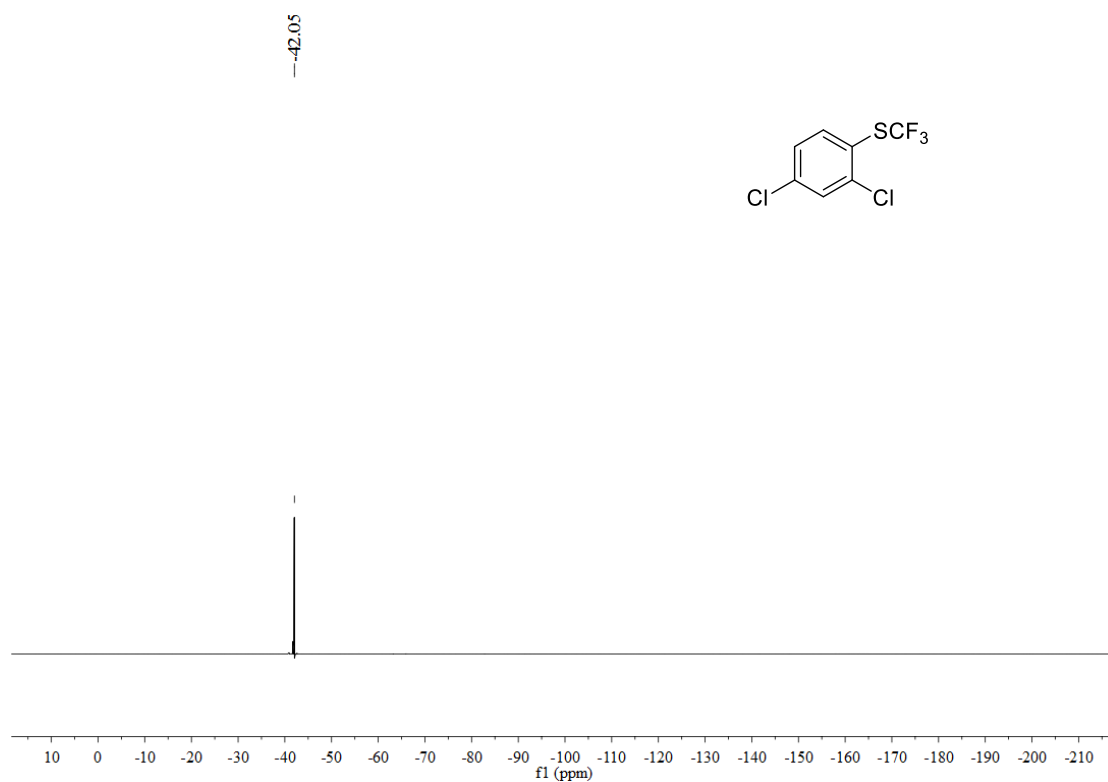

$^{13}\text{C}$  NMR spectrum of **2t** (101 MHz,  $\text{CDCl}_3$ )

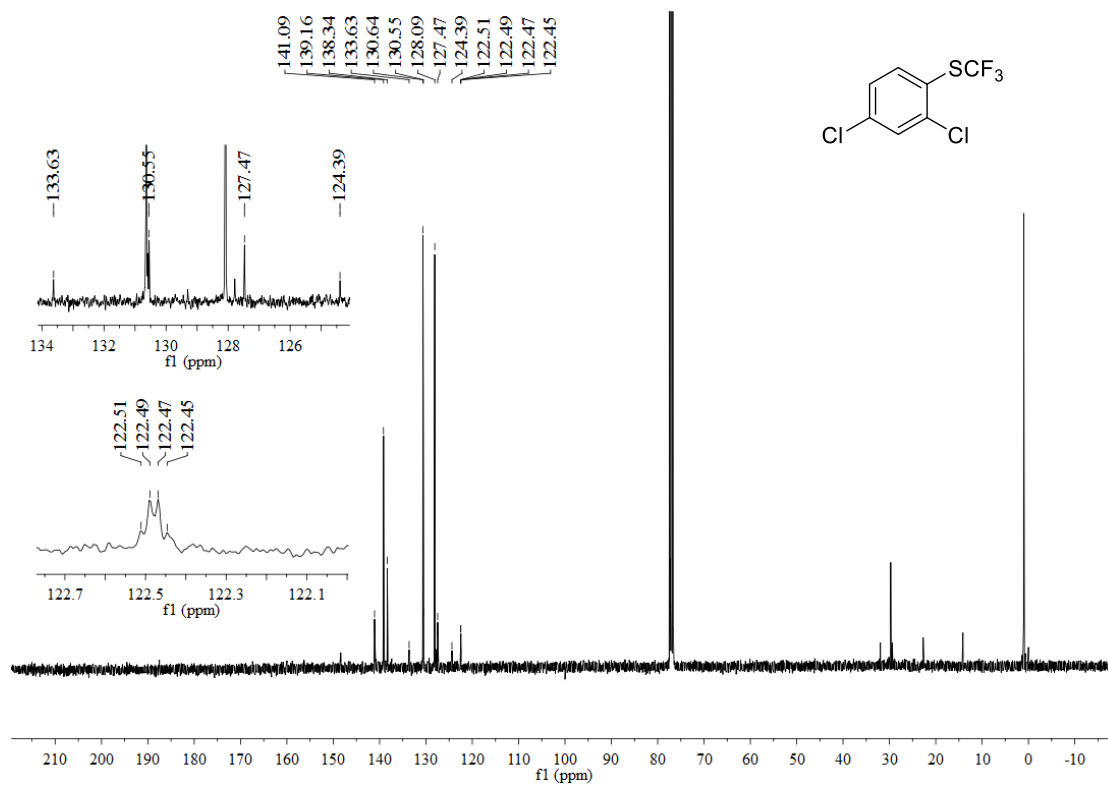

$^1\text{H}$  NMR spectrum of **2u** (400 MHz,  $\text{CDCl}_3$ )

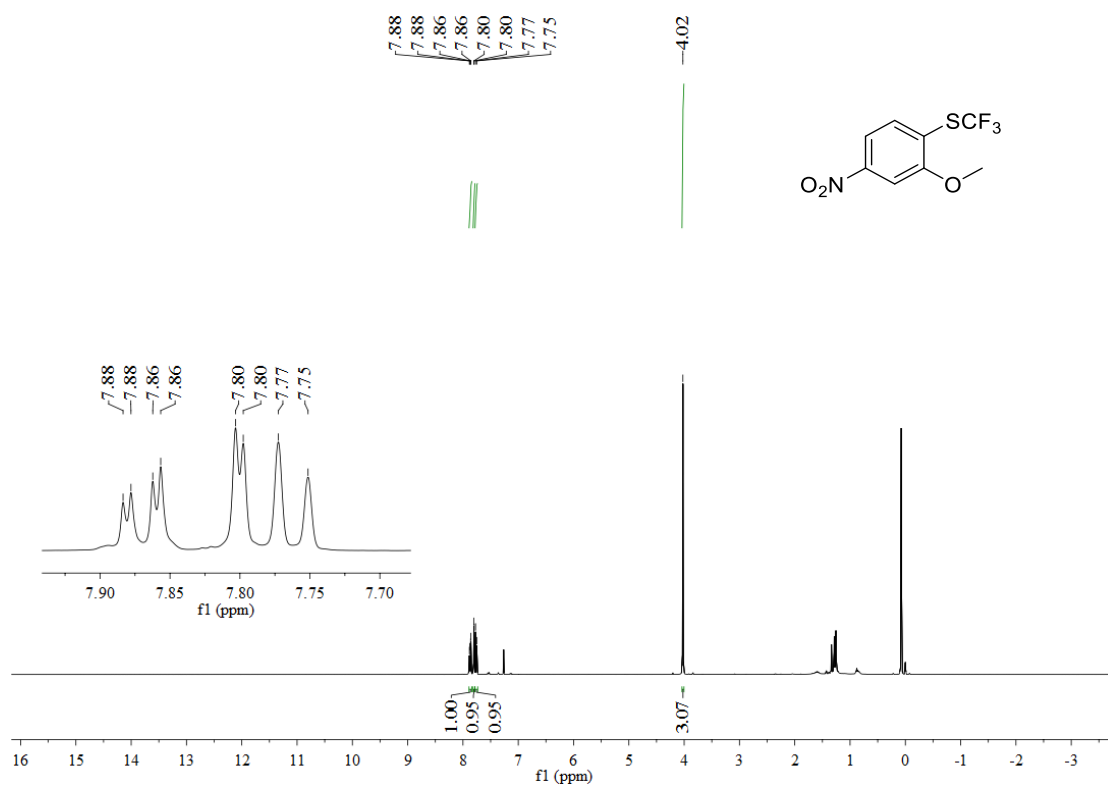

$^{19}\text{F}$  NMR spectrum of **2u** (376 MHz,  $\text{CDCl}_3$ )

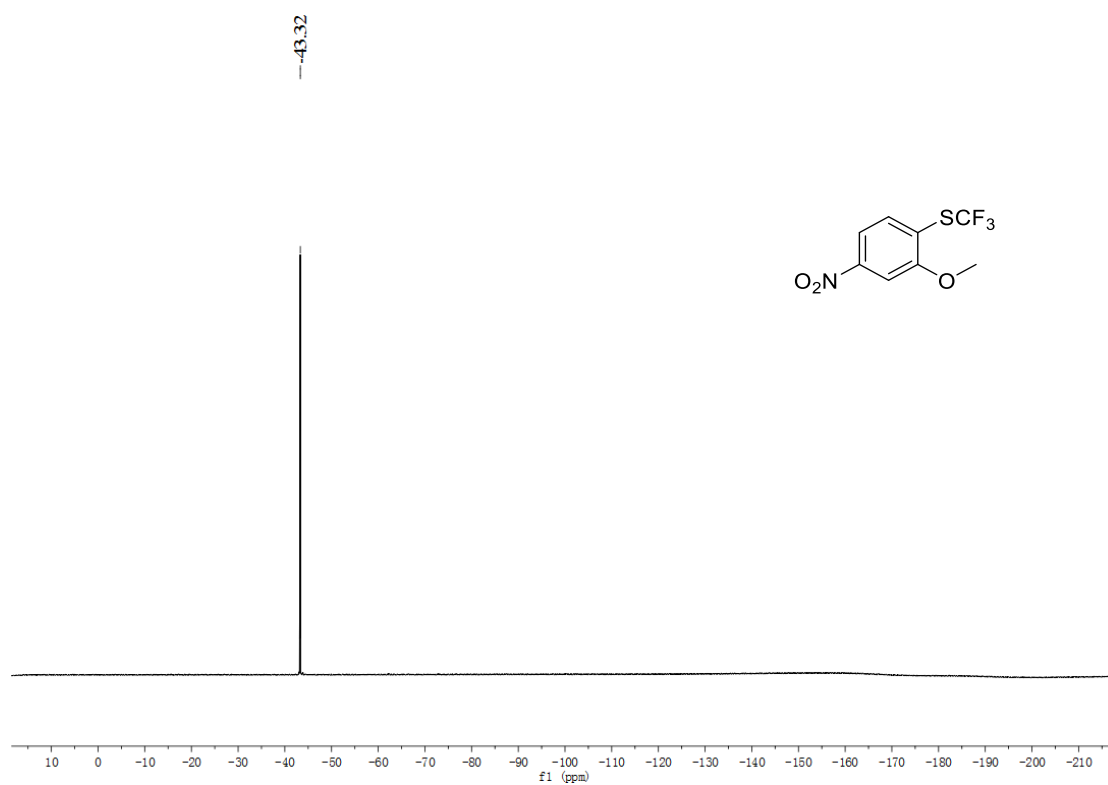

$^{13}\text{C}$  NMR spectrum of **2u** (101 MHz,  $\text{CDCl}_3$ )

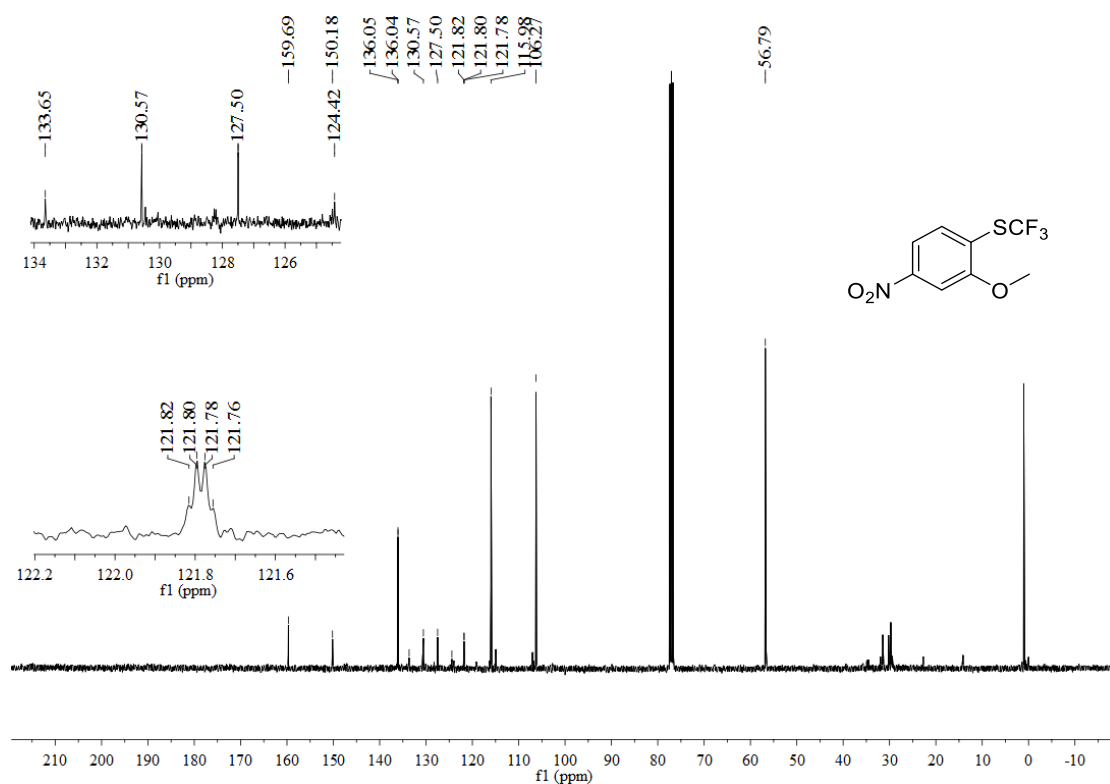

$^1\text{H}$  NMR spectrum of **2v** (400 MHz,  $\text{CDCl}_3$ )

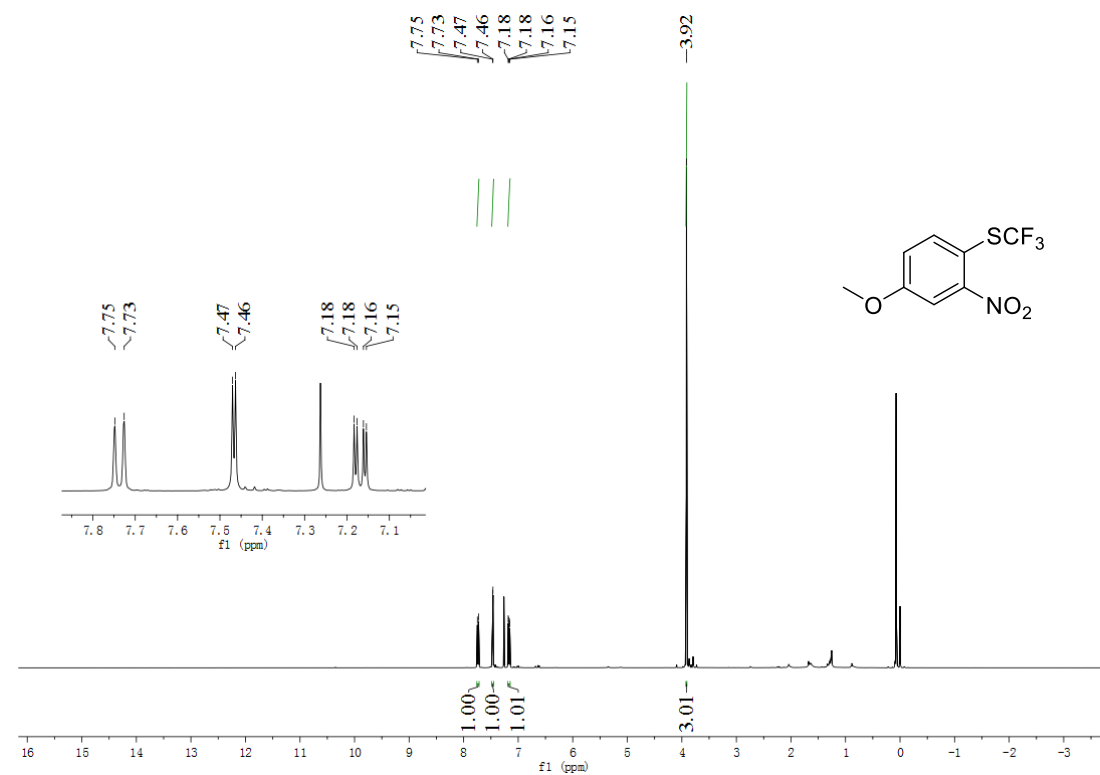

$^{19}\text{F}$  NMR spectrum of **2v** (376 MHz,  $\text{CDCl}_3$ )

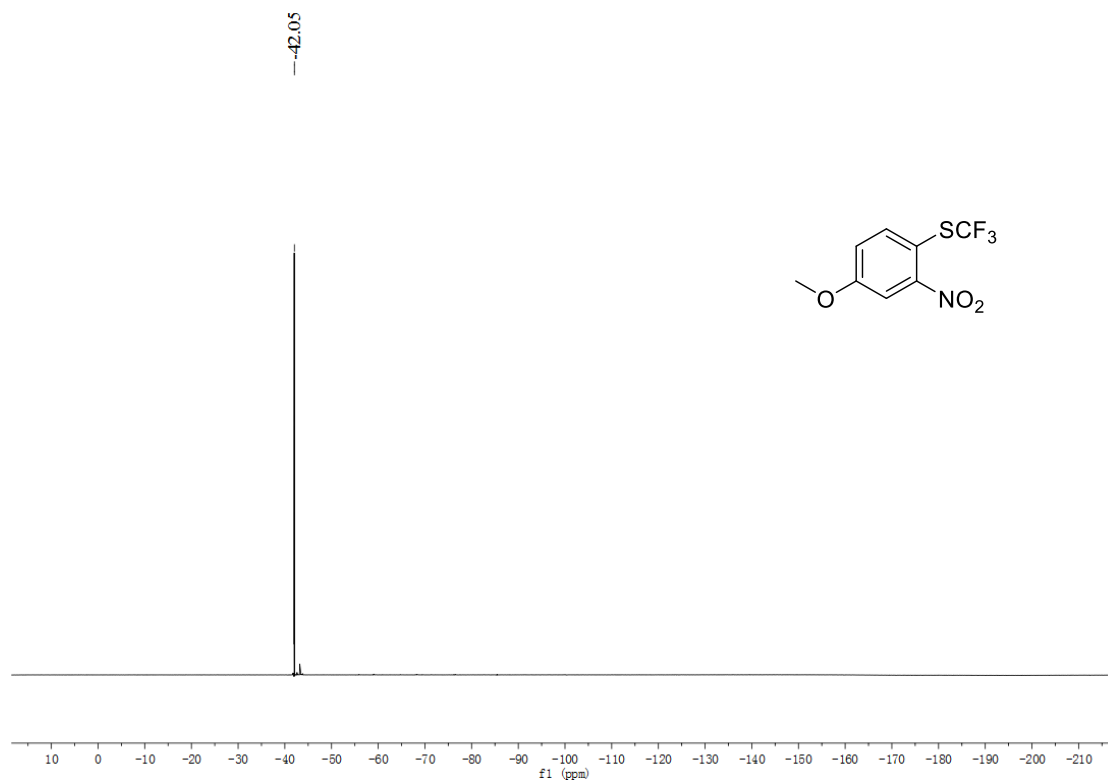

$^{13}\text{C}$  NMR spectrum of **2v** (101 MHz,  $\text{CDCl}_3$ )

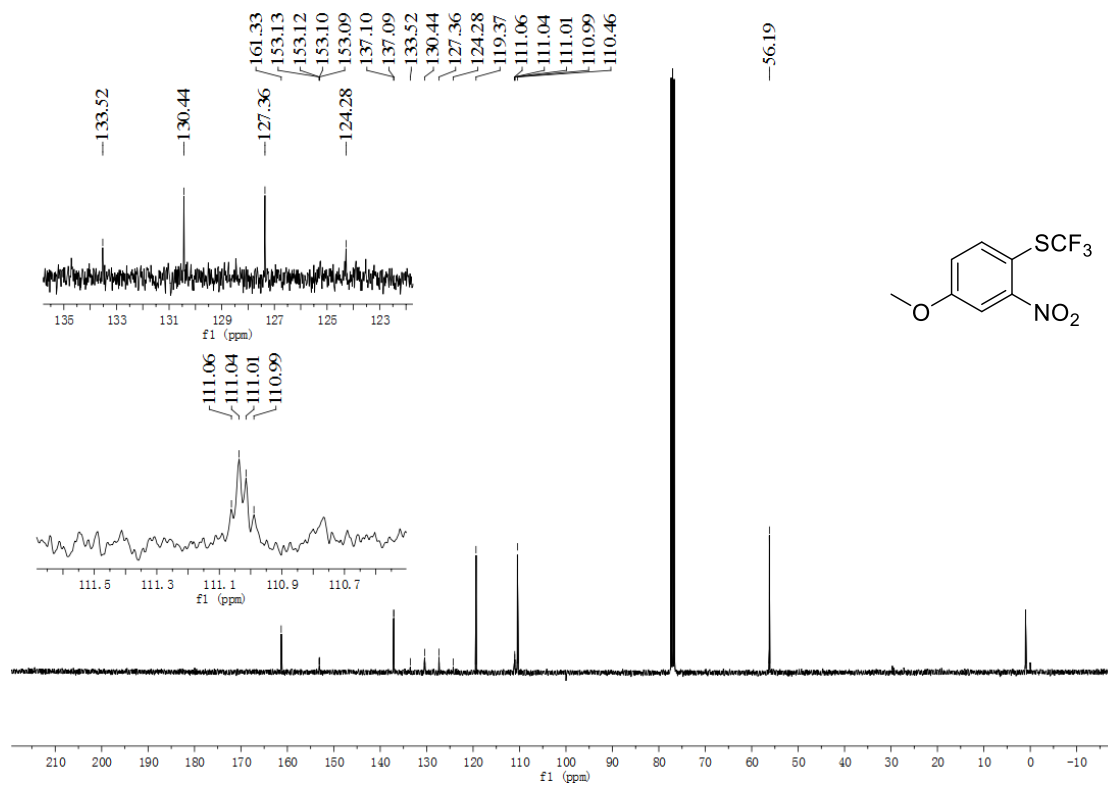

$^1\text{H}$  NMR spectrum of **2w** (400 MHz,  $\text{CDCl}_3$ )

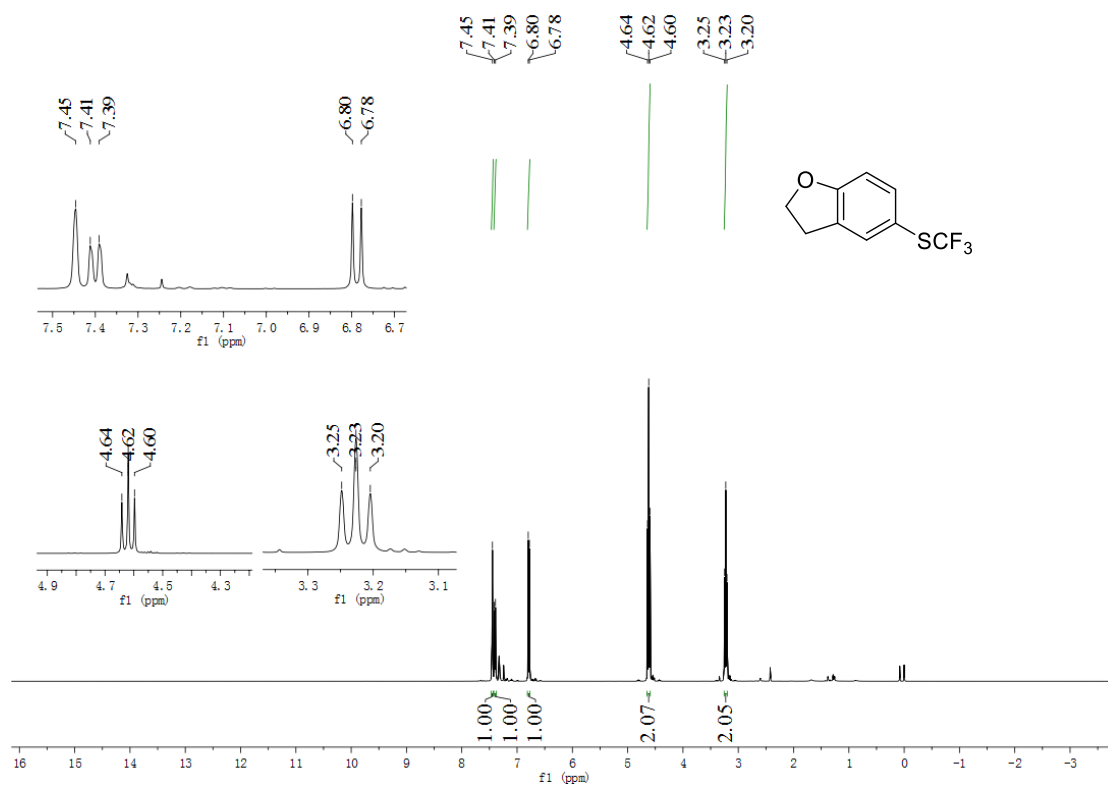

$^{19}\text{F}$  NMR spectrum of **2w** (376 MHz,  $\text{CDCl}_3$ )

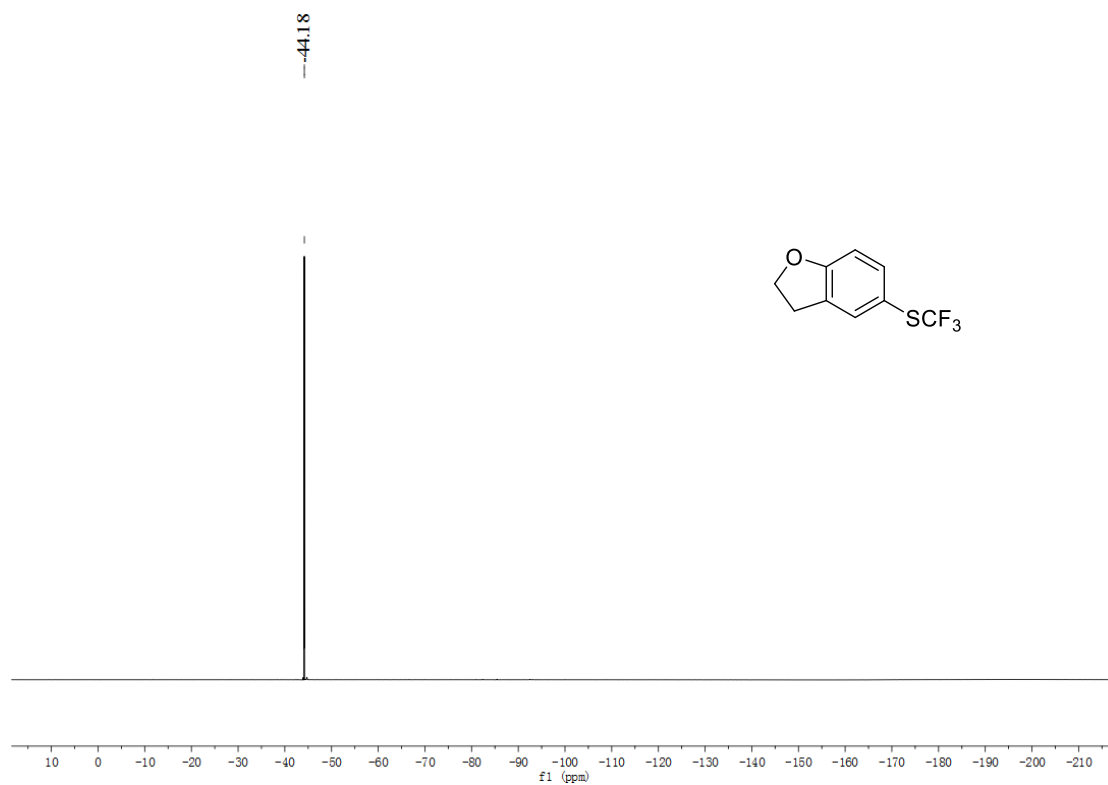

$^{13}\text{C}$  NMR spectrum of **2w** (101 MHz,  $\text{CDCl}_3$ )

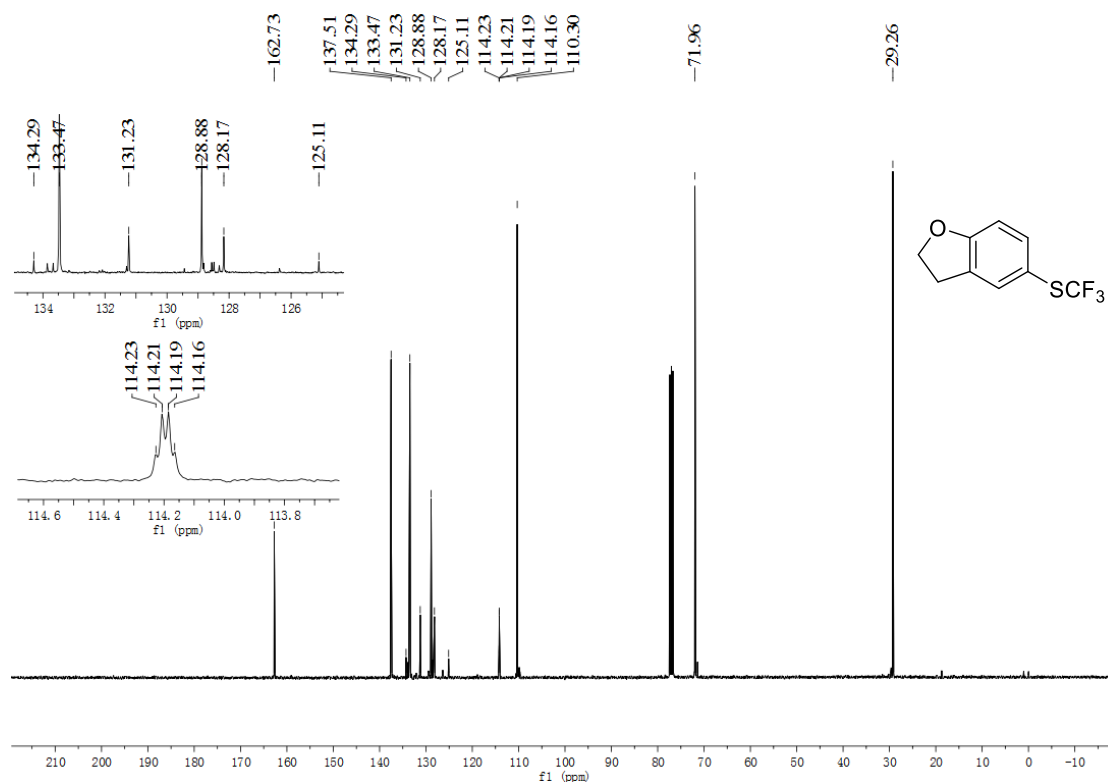

$^1\text{H}$  NMR spectrum of **3a** (400 MHz,  $\text{CDCl}_3$ )

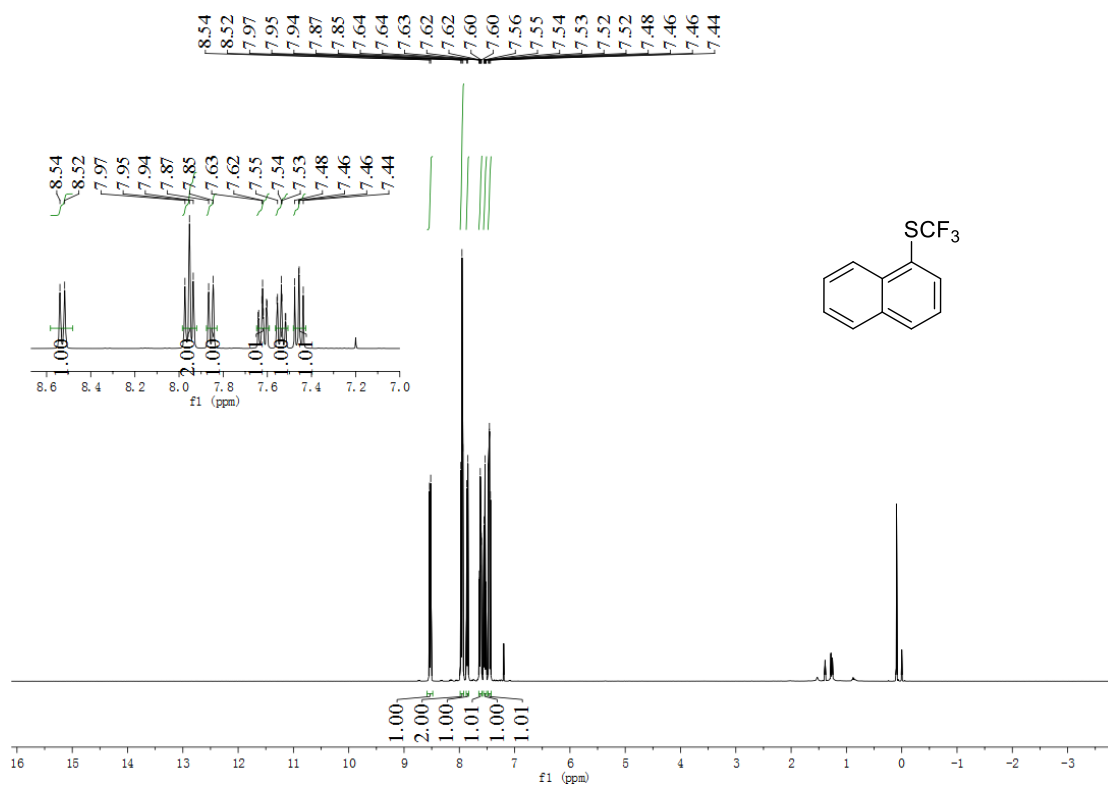

$^{19}\text{F}$  NMR spectrum of **3a** (376 MHz,  $\text{CDCl}_3$ )

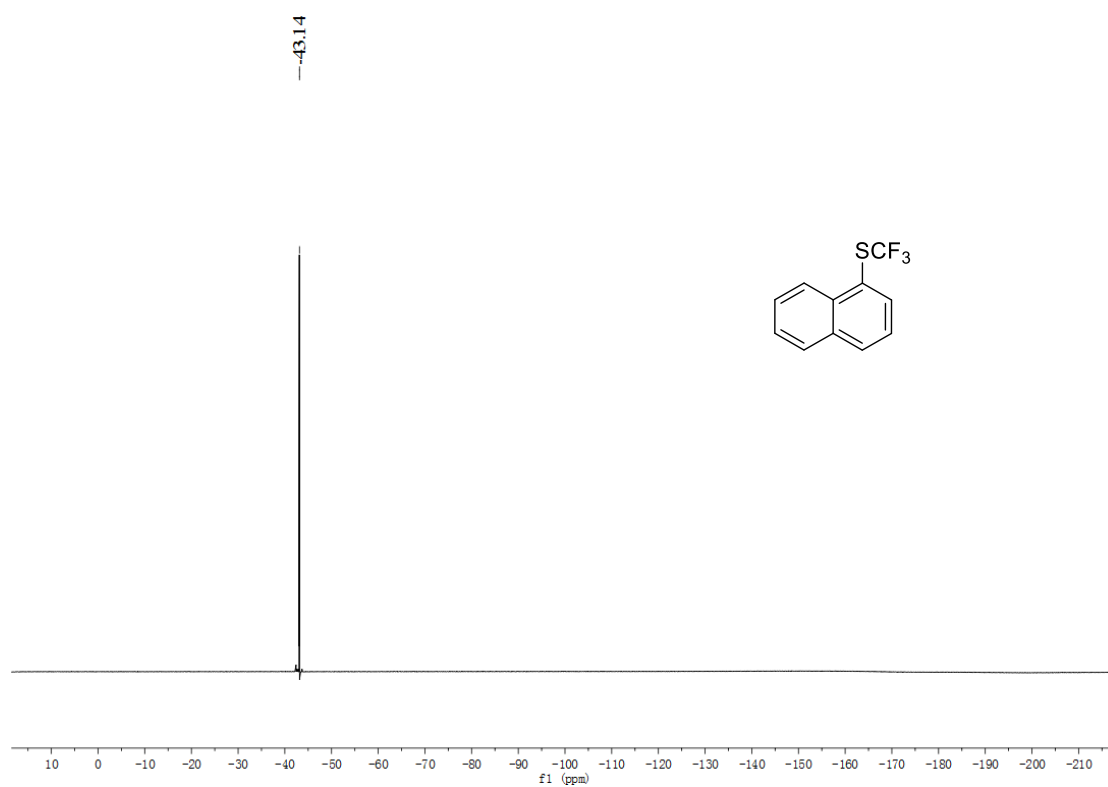

$^{13}\text{C}$  NMR spectrum of **3a** (101 MHz,  $\text{CDCl}_3$ )

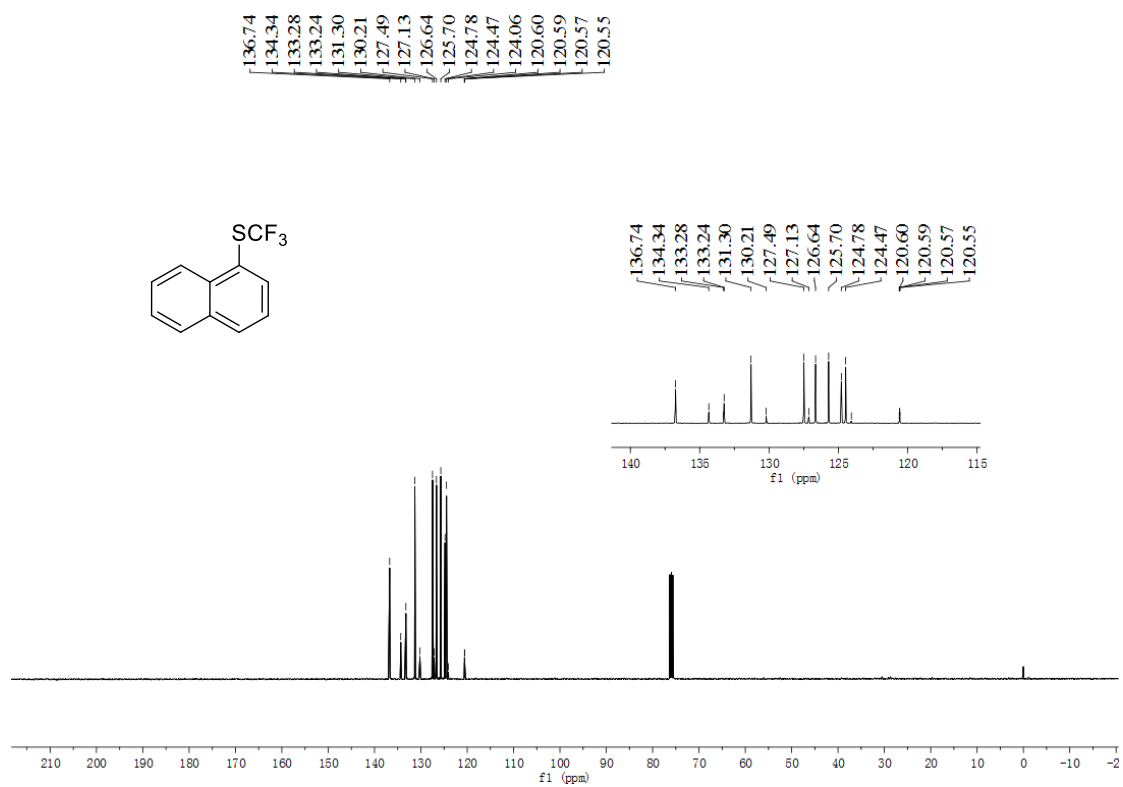

$^1\text{H}$  NMR spectrum of **3b** (400 MHz,  $\text{CDCl}_3$ )

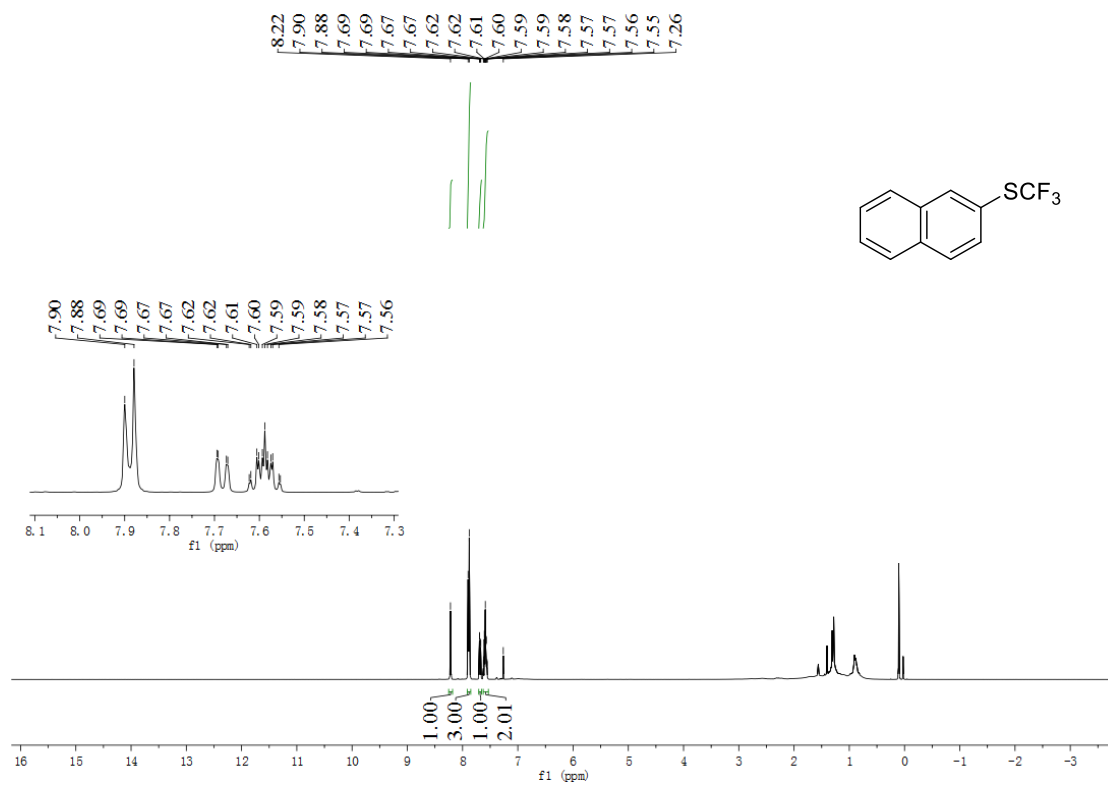

$^{19}\text{F}$  NMR spectrum of **3b** (376 MHz,  $\text{CDCl}_3$ )

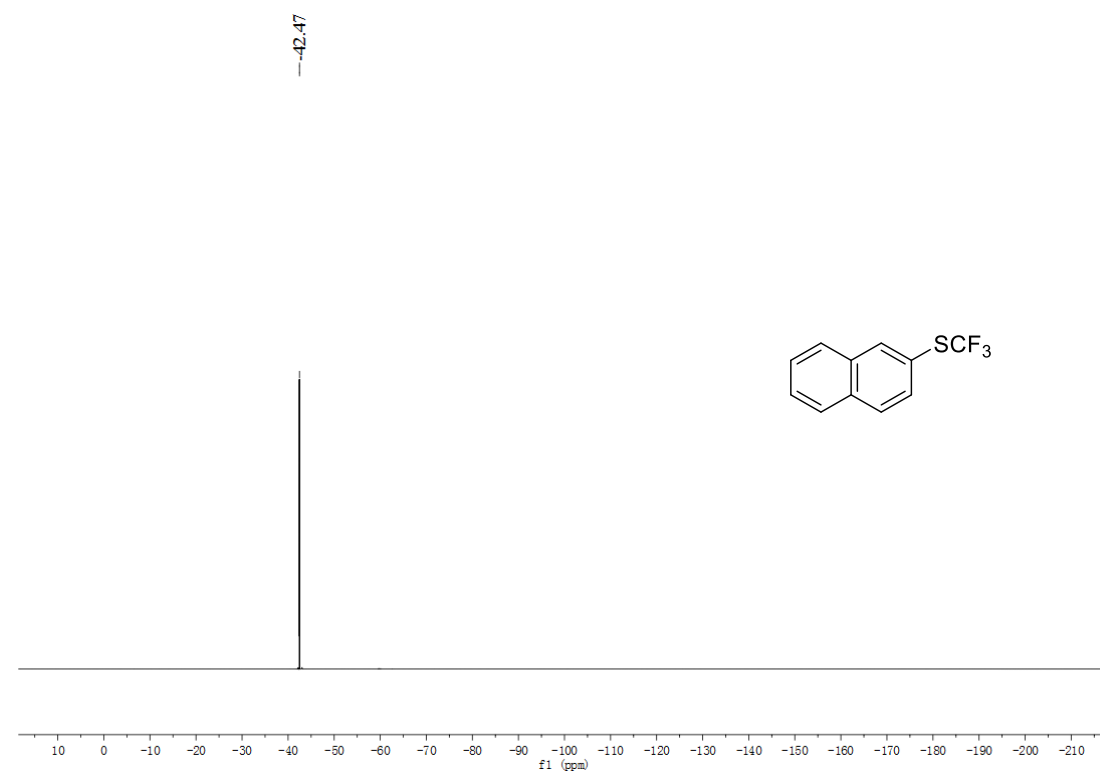



$^{13}\text{C}$  NMR spectrum of **3b** (101 MHz,  $\text{CDCl}_3$ )

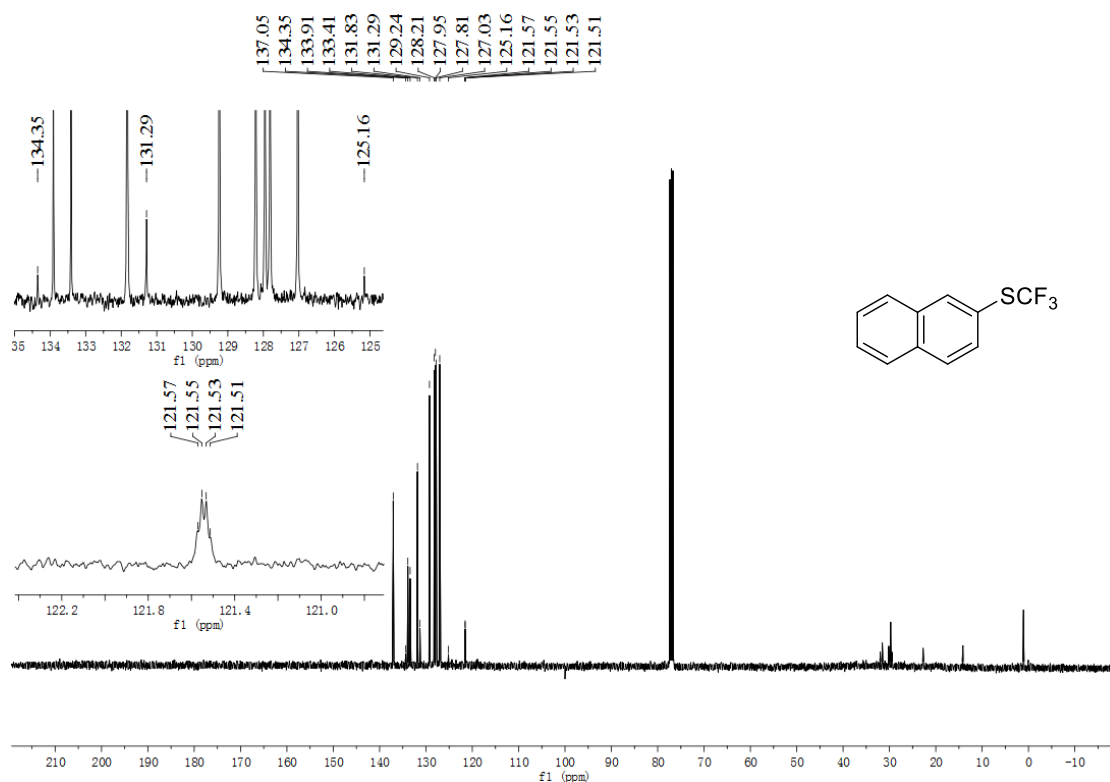

$^1\text{H}$  NMR spectrum of **3c** (400 MHz,  $\text{CDCl}_3$ )

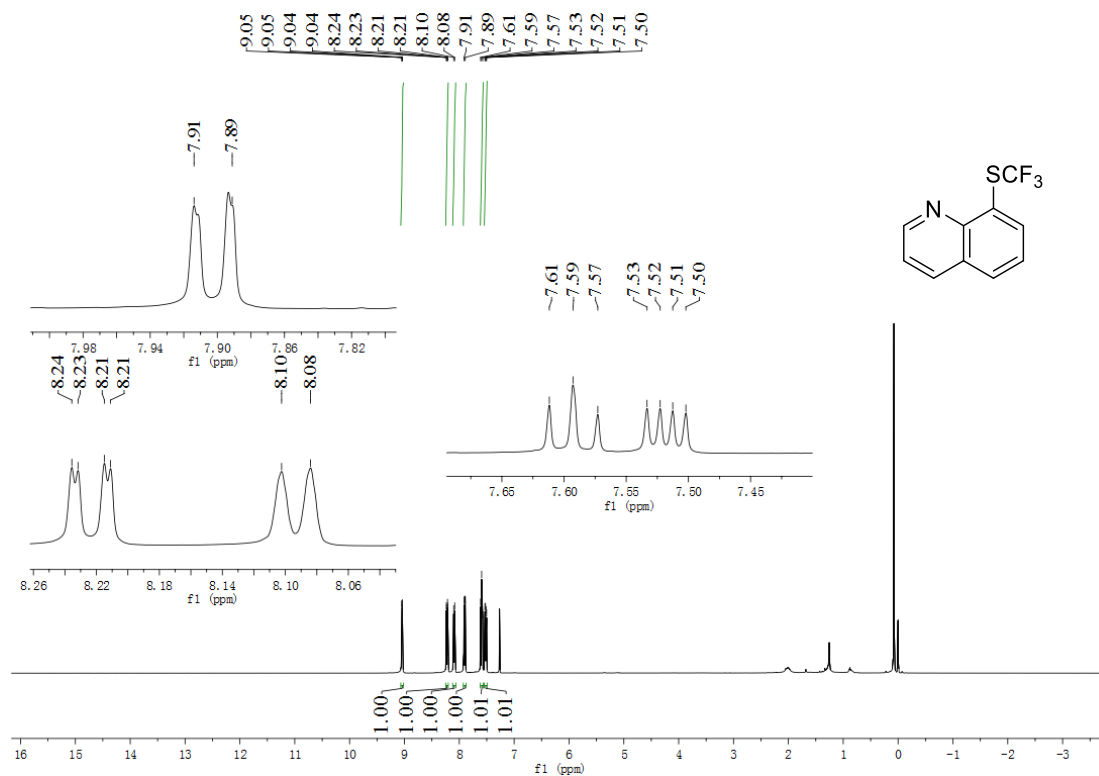

$^{19}\text{F}$  NMR spectrum of **3c** (376 MHz,  $\text{CDCl}_3$ )

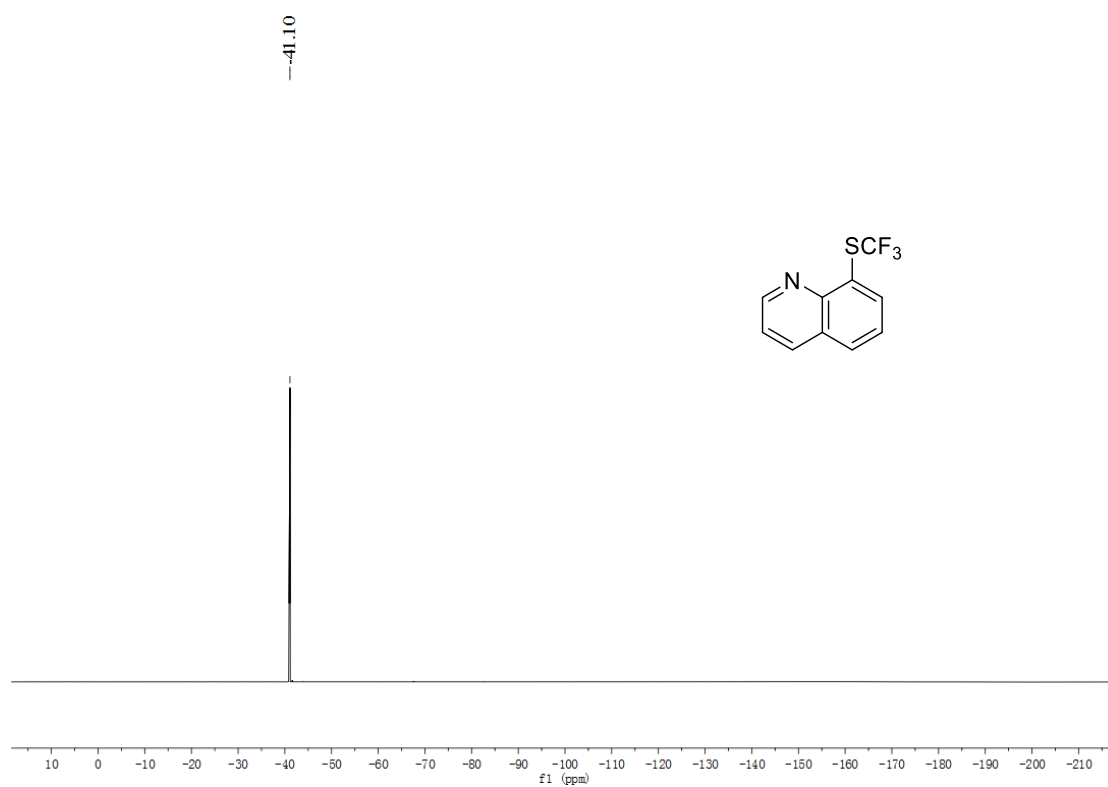

$^{13}\text{C}$  NMR spectrum of **3c** (101 MHz,  $\text{CDCl}_3$ )

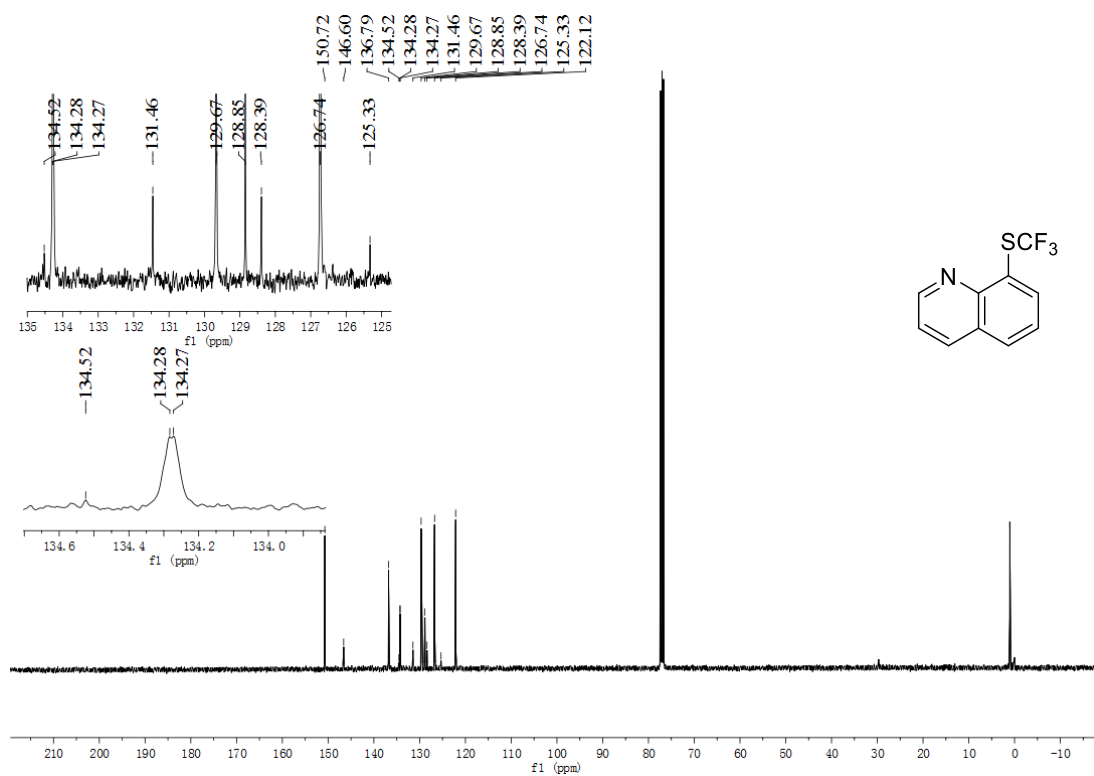

$^1\text{H}$  NMR spectrum of **3d** (400 MHz,  $\text{CDCl}_3$ )

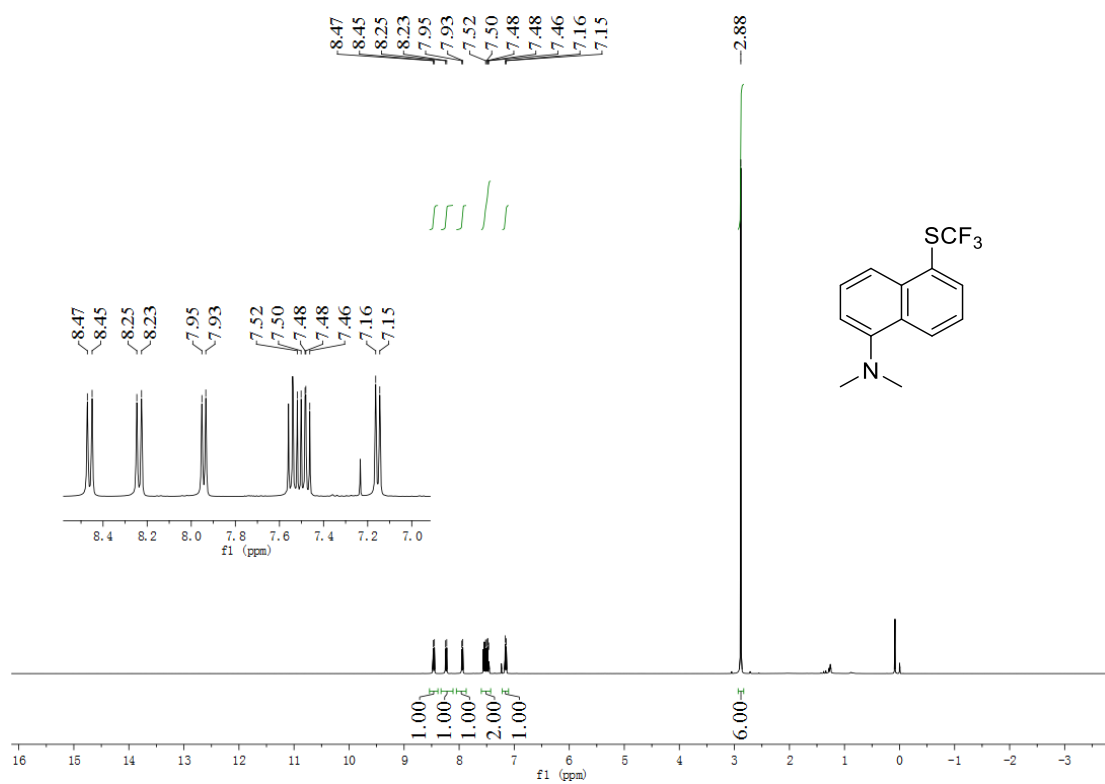

$^{19}\text{F}$  NMR spectrum of **3d** (376 MHz,  $\text{CDCl}_3$ )

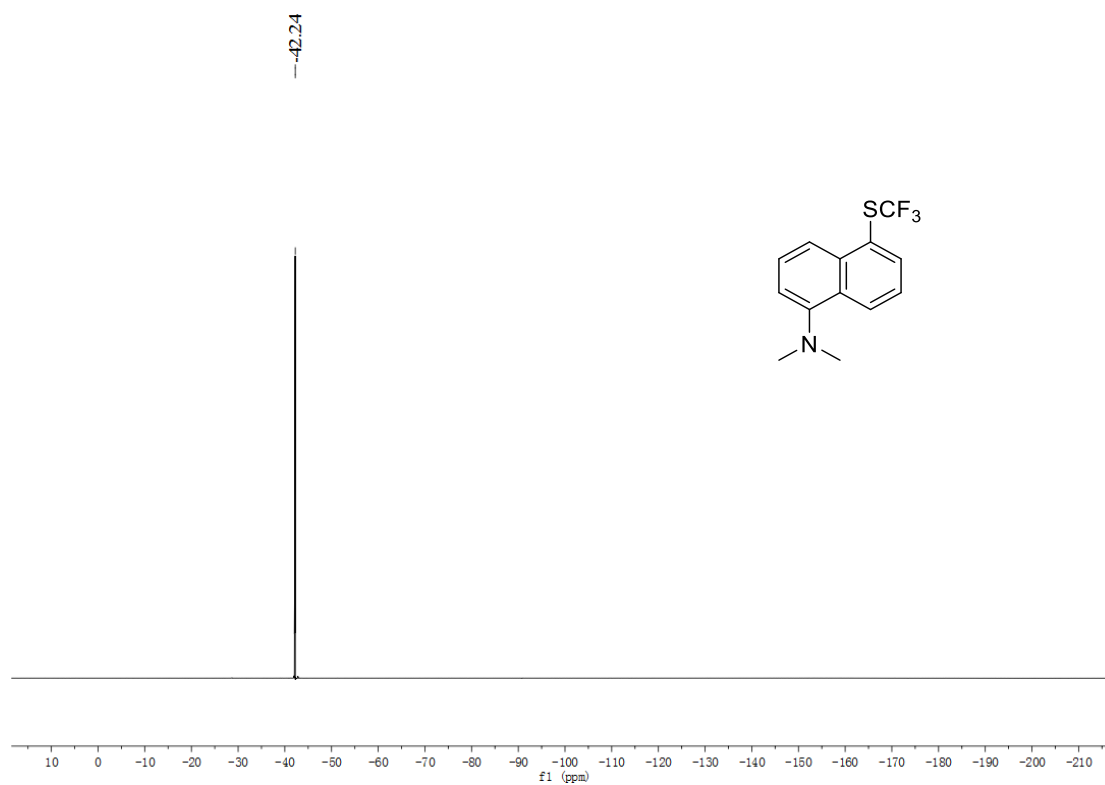

$^{13}\text{C}$  NMR spectrum of **3d** (101 MHz,  $\text{CDCl}_3$ )

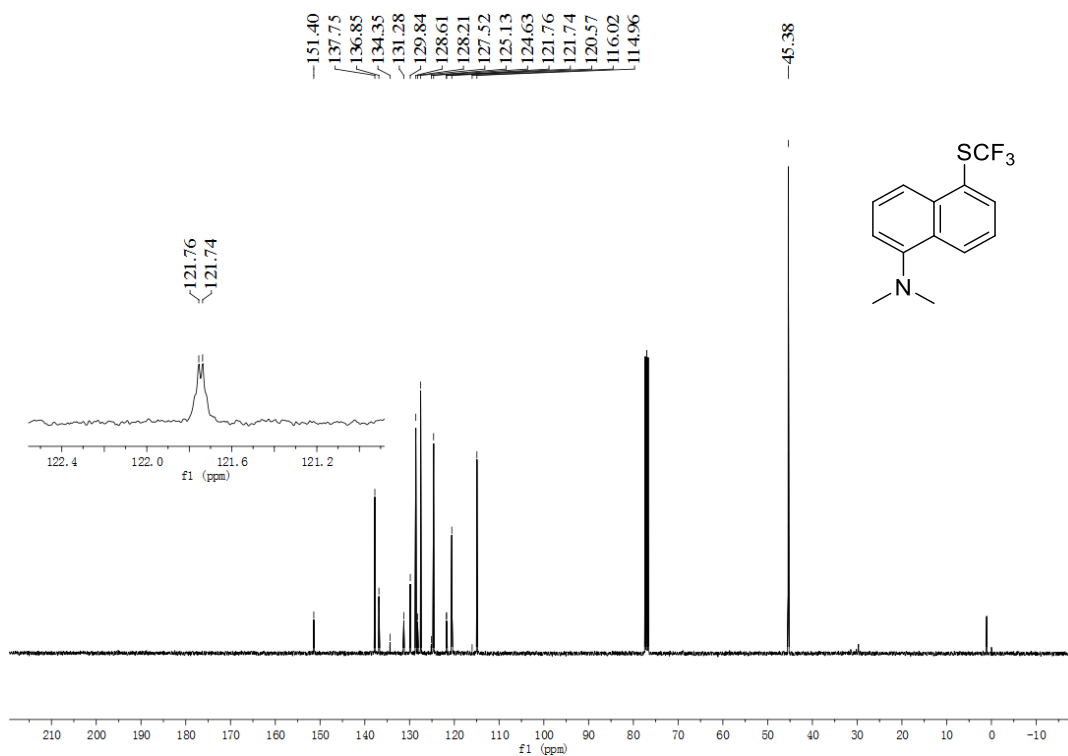

$^1\text{H}$  NMR spectrum of **3e** (400 MHz,  $\text{CDCl}_3$ )

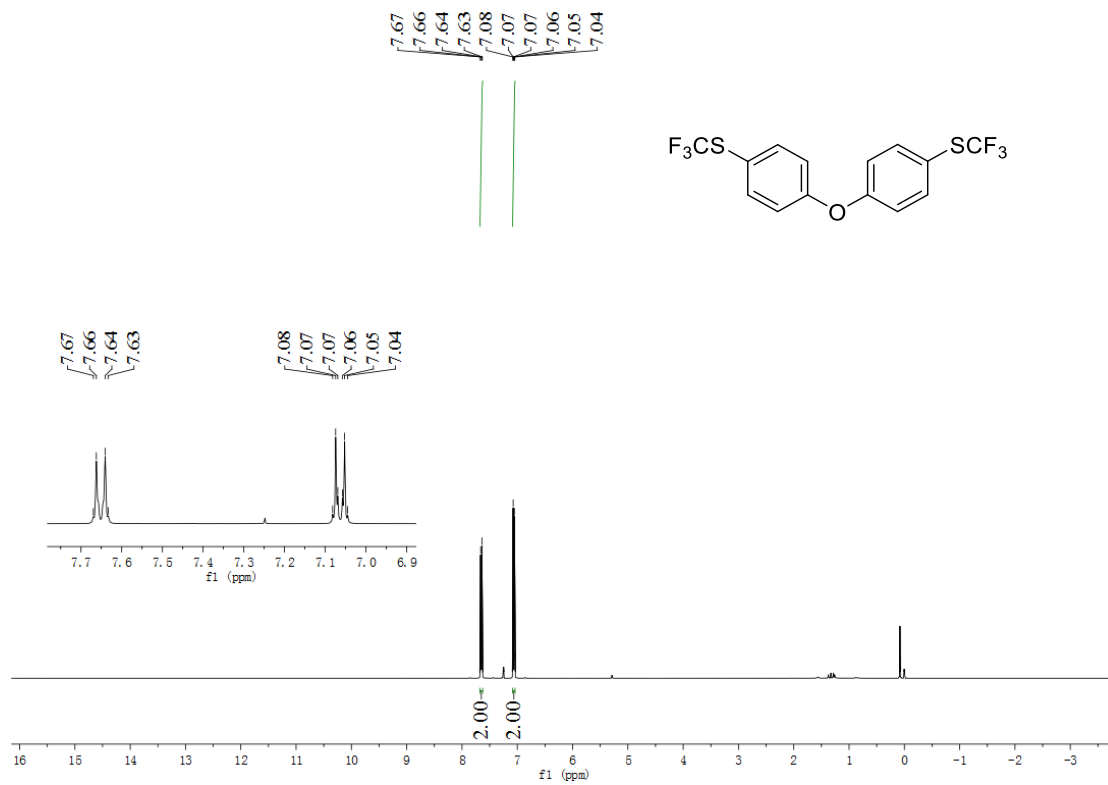

$^{19}\text{F}$  NMR spectrum of **3e** (376 MHz,  $\text{CDCl}_3$ )

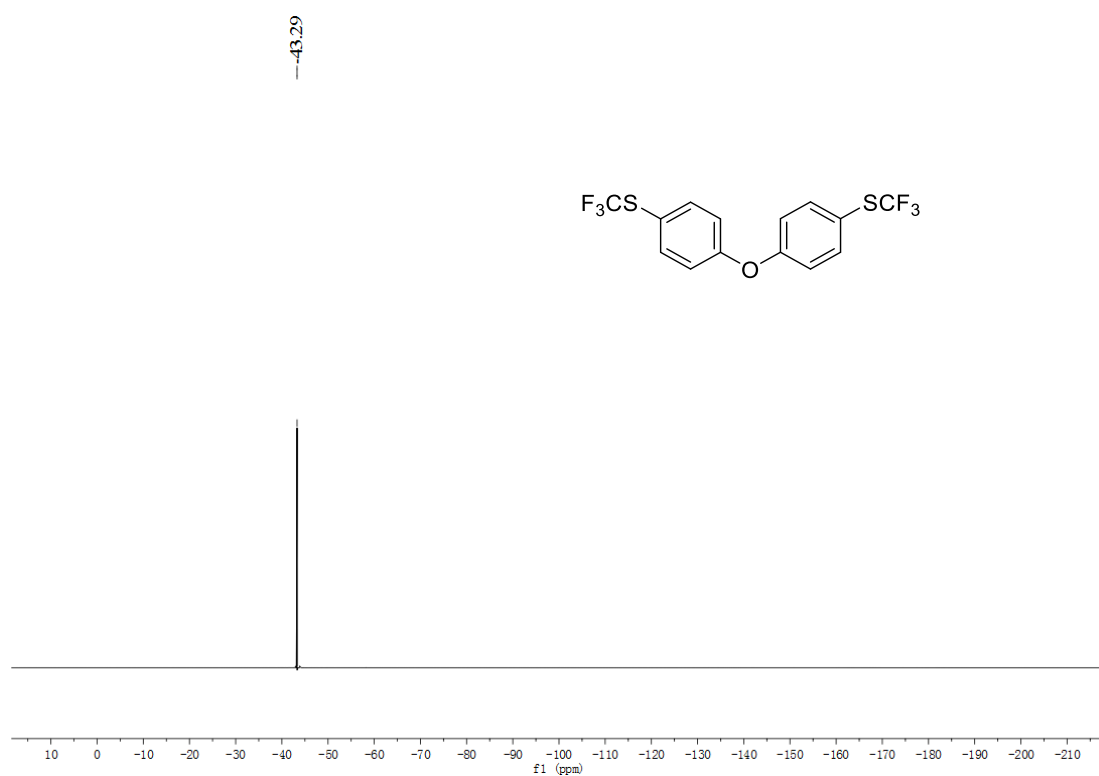

$^{13}\text{C}$  NMR spectrum of **3e** (101 MHz,  $\text{CDCl}_3$ )

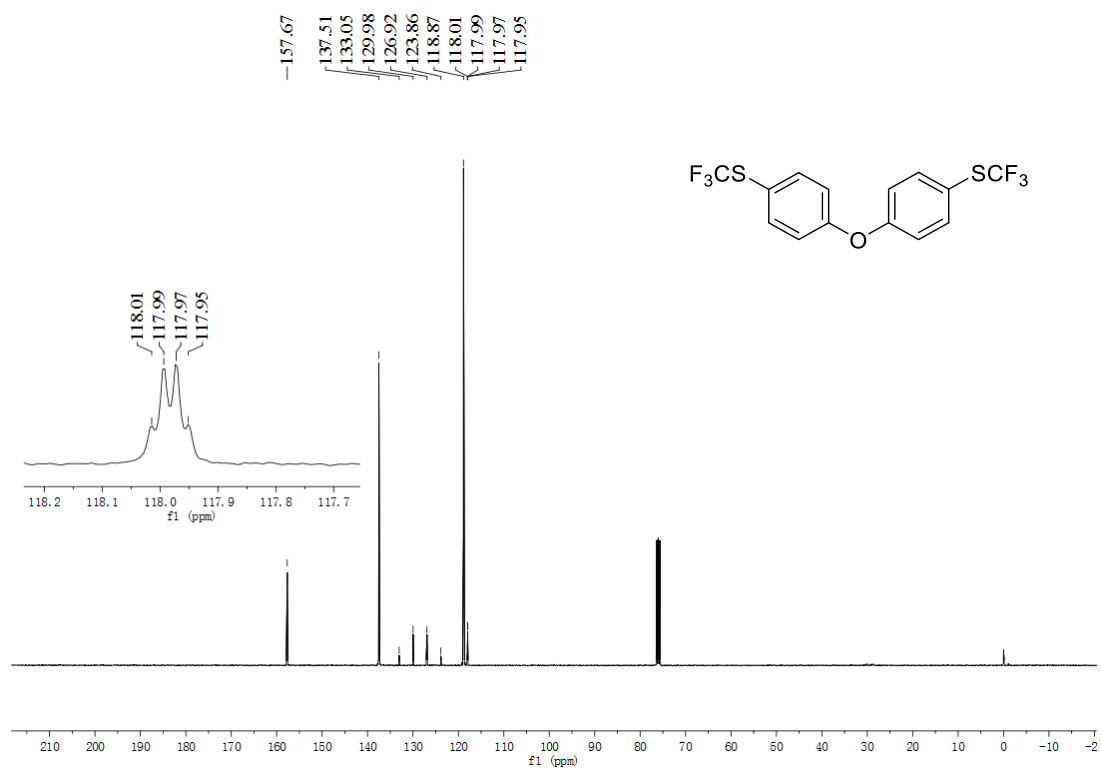

$^1\text{H}$  NMR spectrum of **3f** (400 MHz,  $\text{CDCl}_3$ )

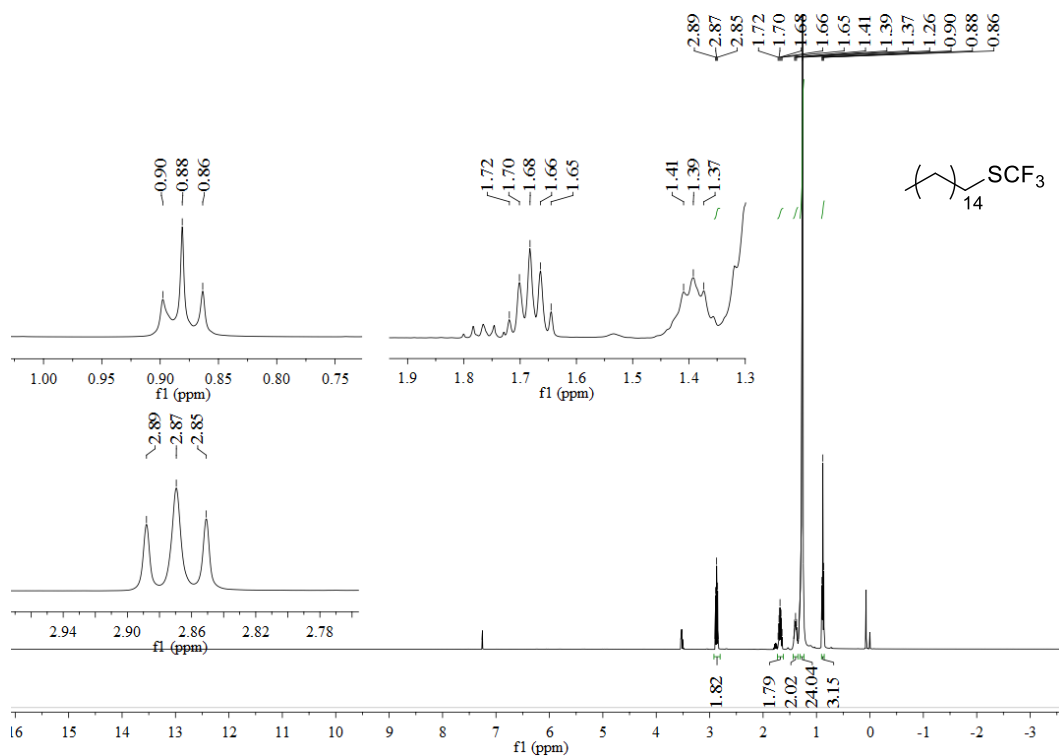

$^{19}\text{F}$  NMR spectrum of **3f** (376 MHz,  $\text{CDCl}_3$ )

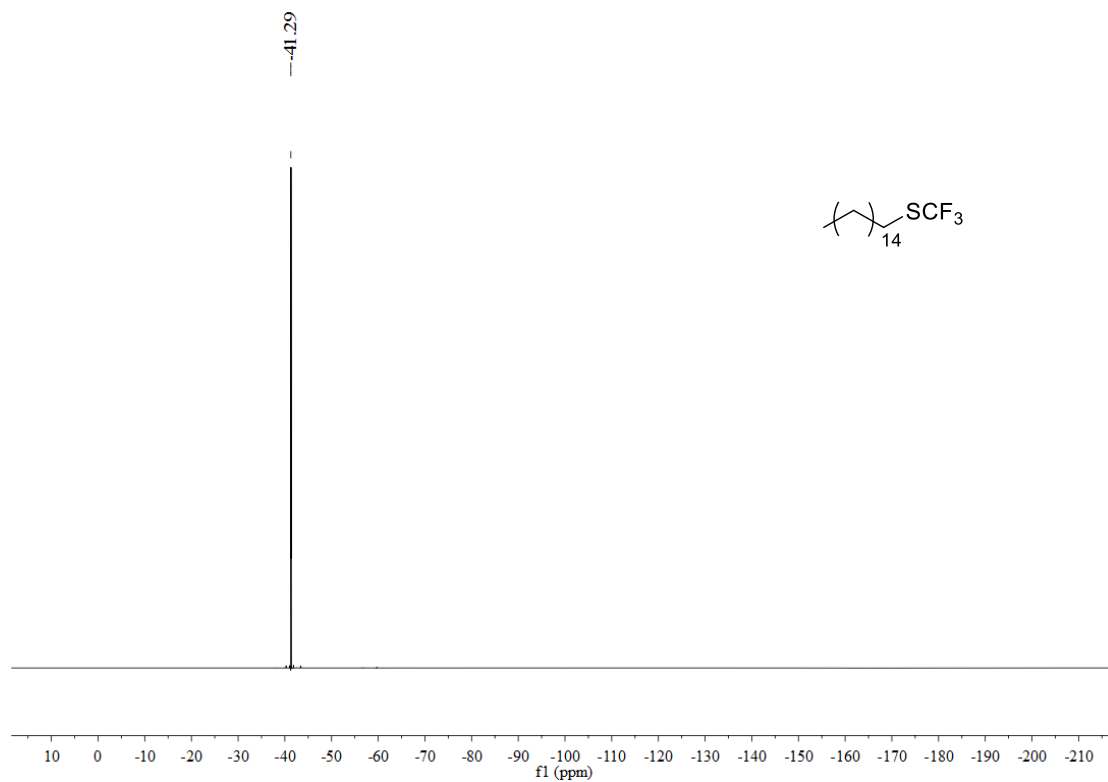

$^{13}\text{C}$  NMR spectrum of **3f** (101 MHz,  $\text{CDCl}_3$ )

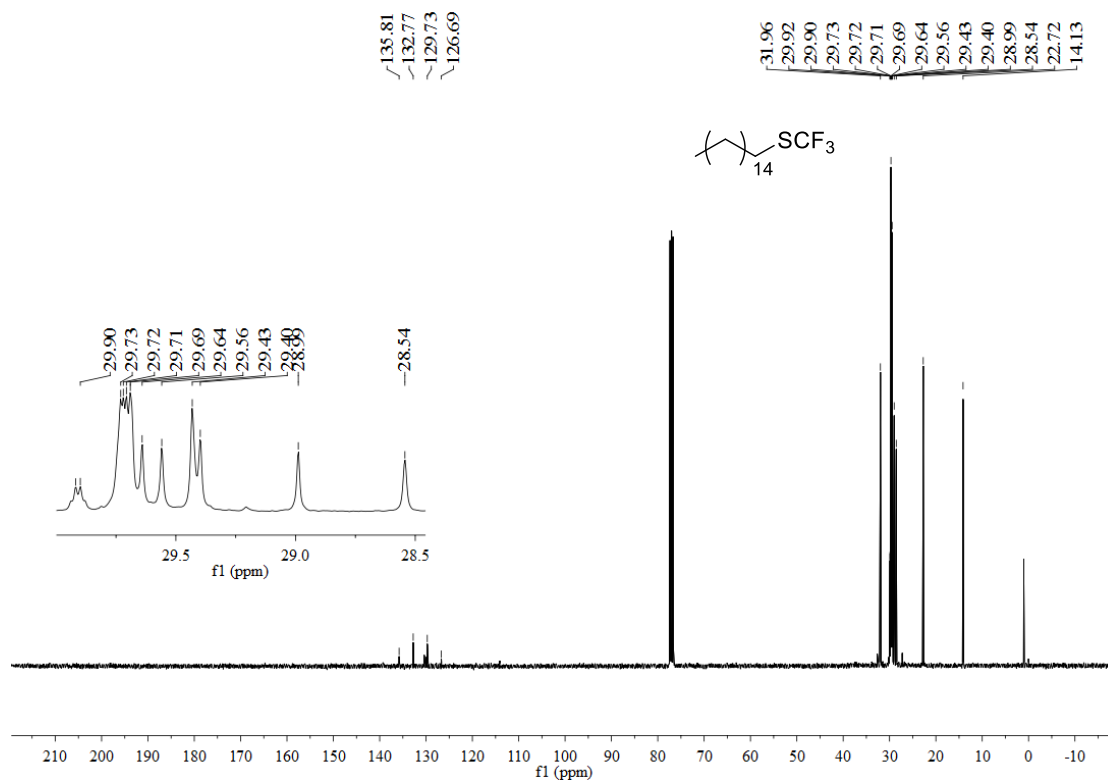

$^1\text{H}$  NMR spectrum of **3g** (400 MHz,  $\text{CDCl}_3$ )

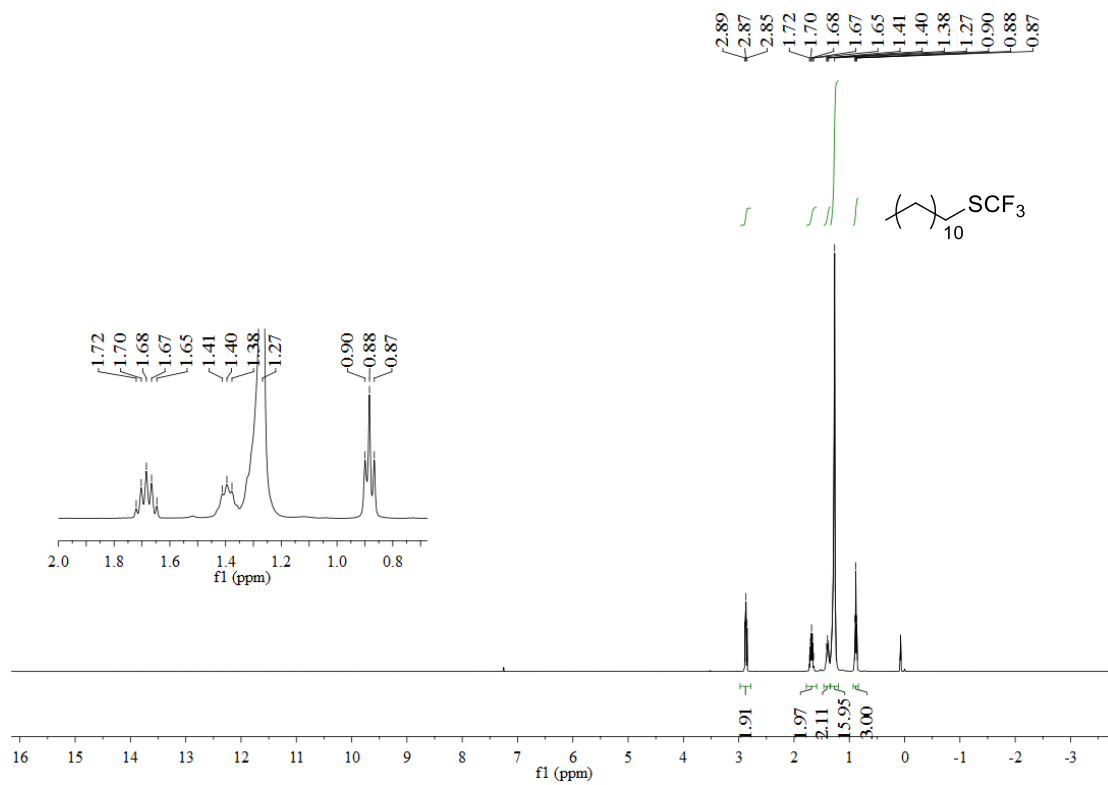

$^{19}\text{F}$  NMR spectrum of **3g** (376 MHz,  $\text{CDCl}_3$ )

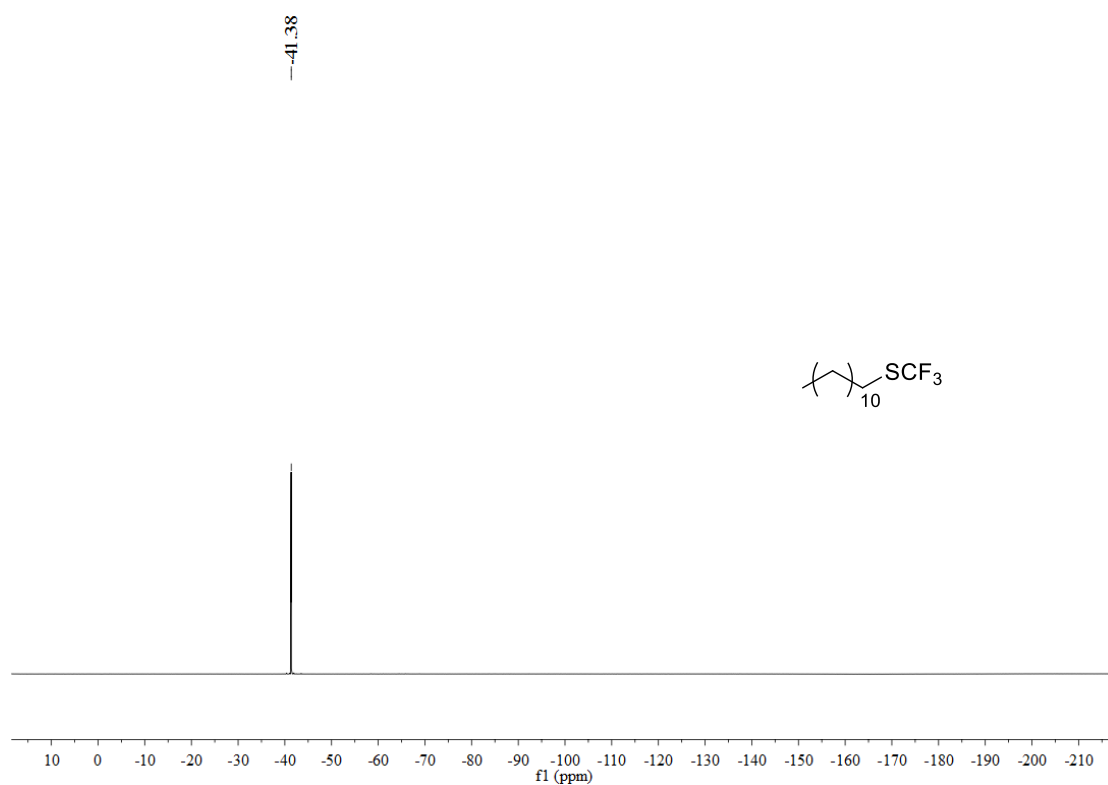

$^{13}\text{C}$  NMR spectrum of **3g** (101 MHz,  $\text{CDCl}_3$ )

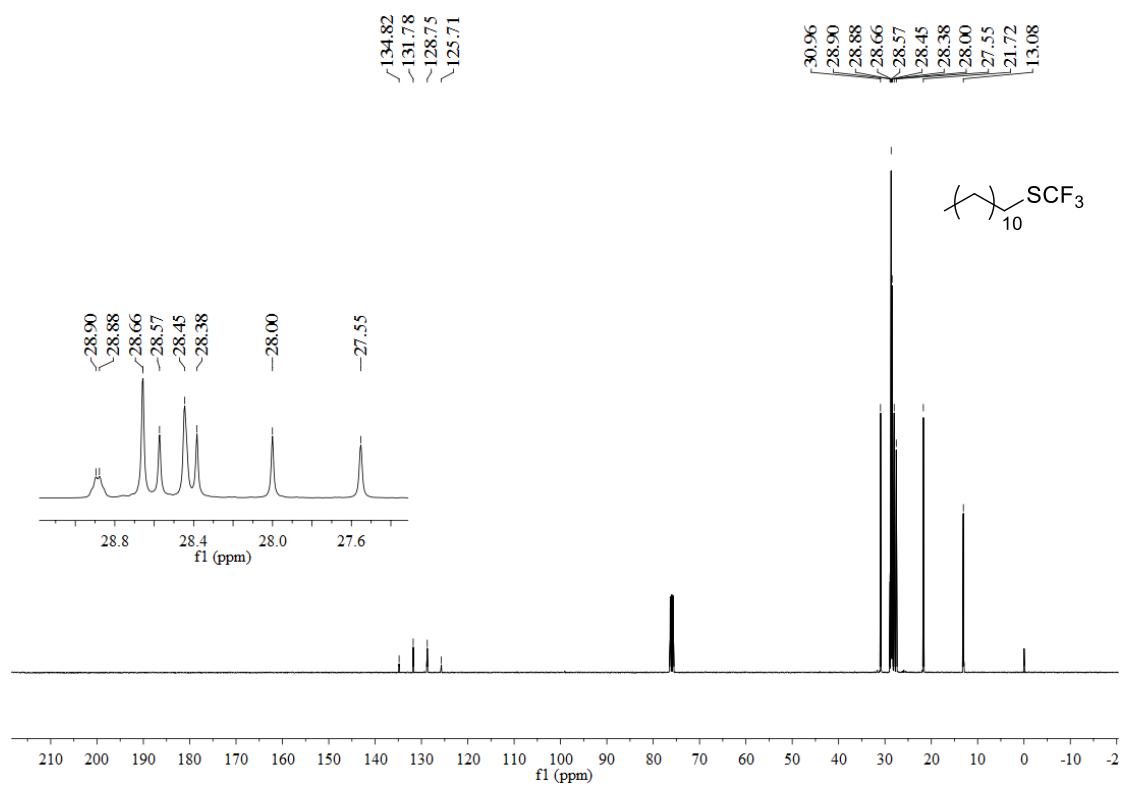



$^1\text{H}$  NMR spectrum of **3h** (400 MHz,  $\text{CDCl}_3$ )

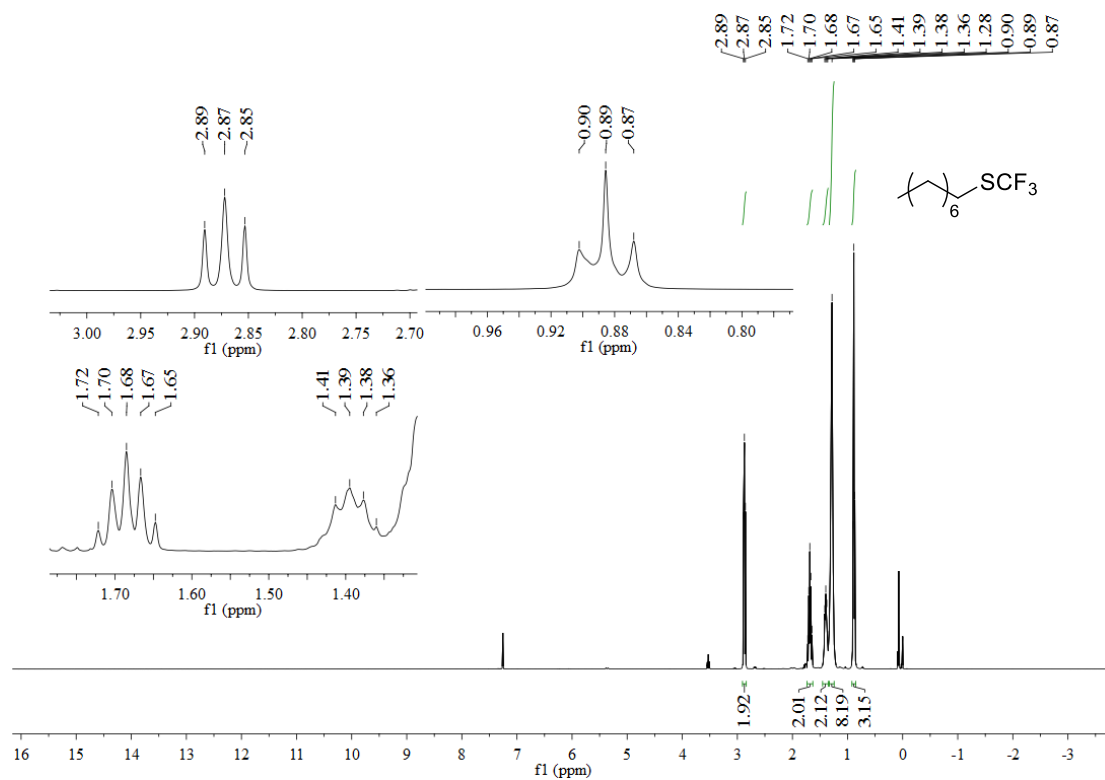

$^{19}\text{F}$  NMR spectrum of **3h** (376 MHz,  $\text{CDCl}_3$ )

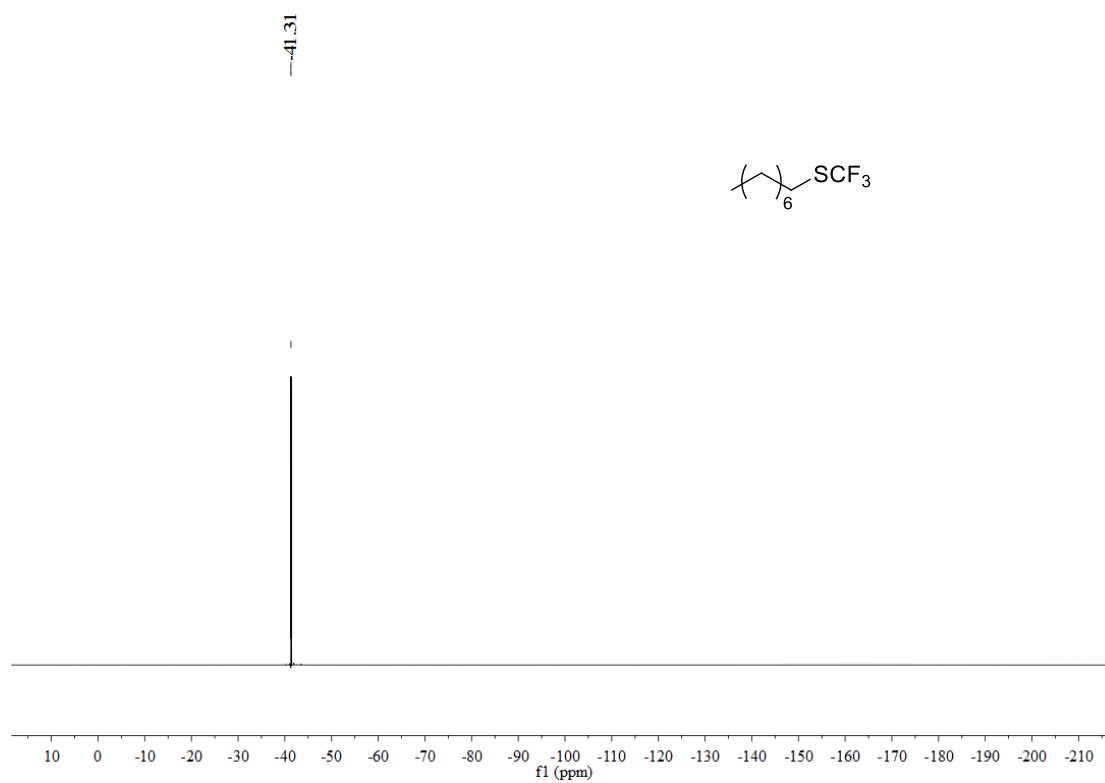

$^{13}\text{C}$  NMR spectrum of **3h** (101 MHz,  $\text{CDCl}_3$ )

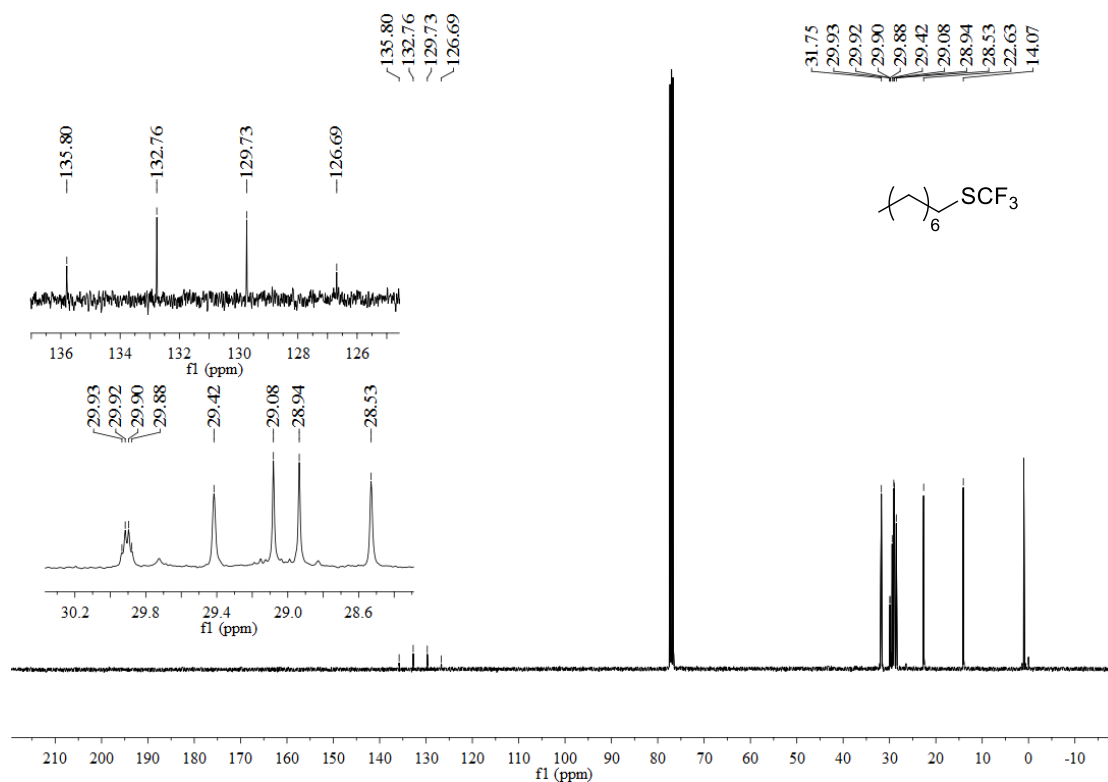

$^1\text{H}$  NMR spectrum of **3i** (400 MHz,  $\text{CDCl}_3$ )

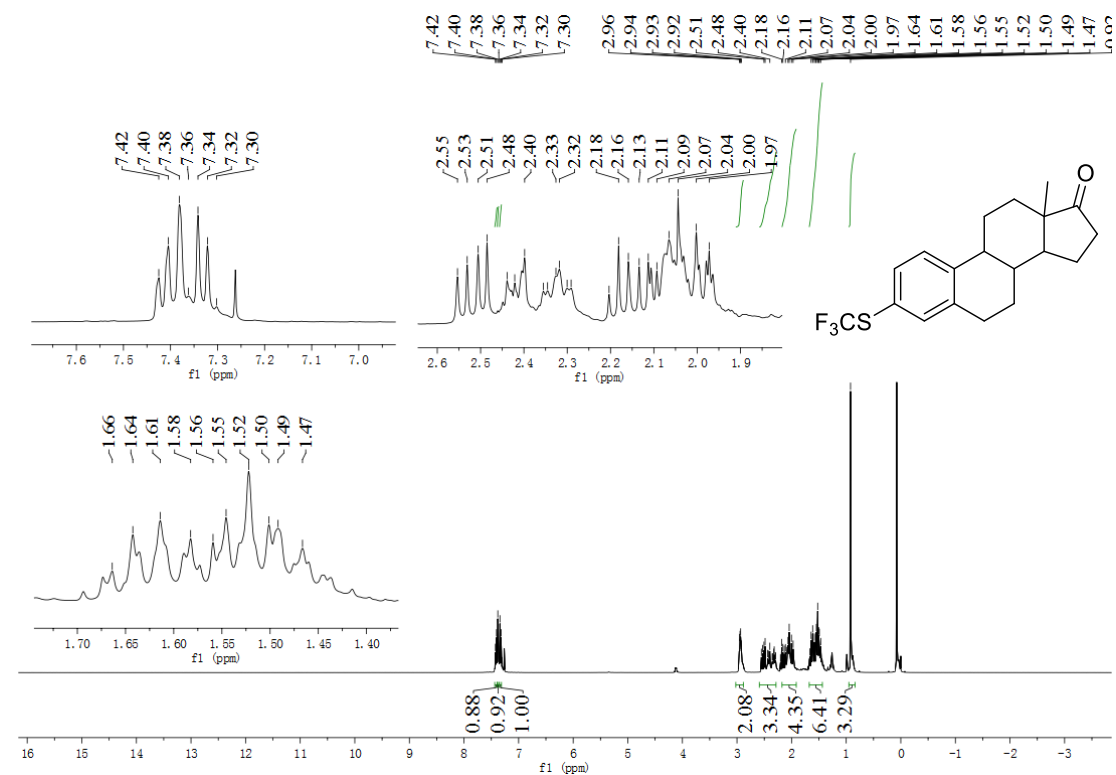

$^{19}\text{F}$  NMR spectrum of **3i** (376 MHz,  $\text{CDCl}_3$ )

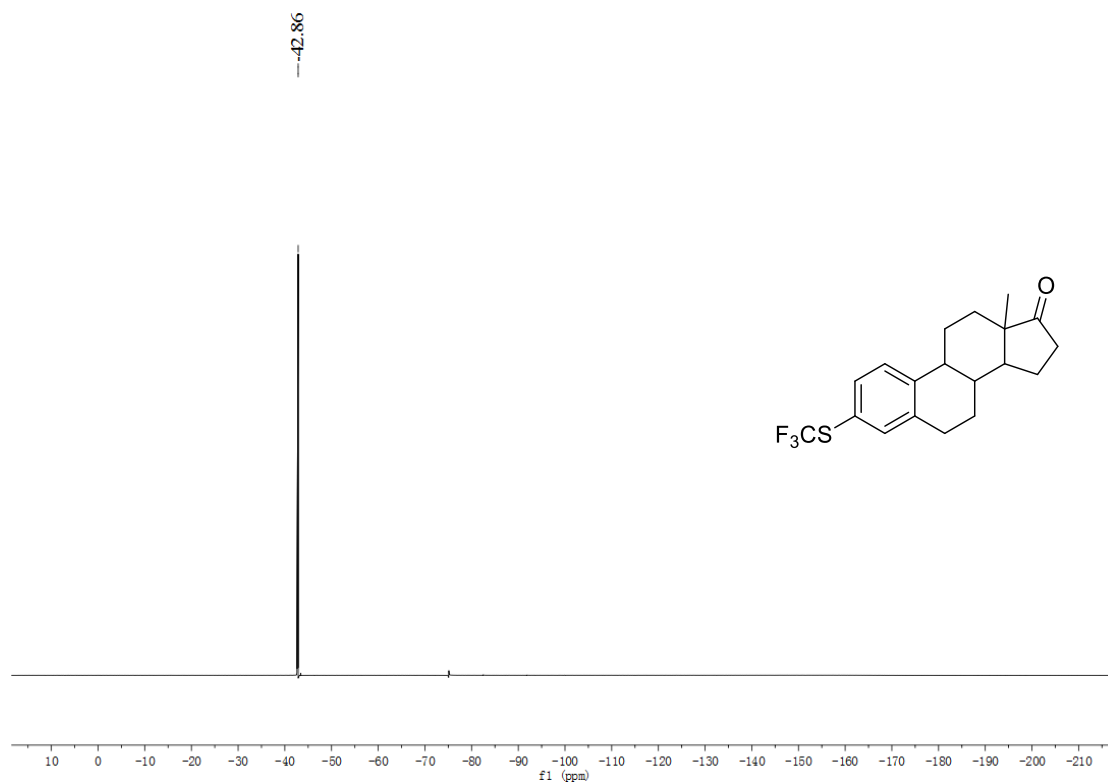

$^{13}\text{C}$  NMR spectrum of **3i** (101 MHz,  $\text{CDCl}_3$ )

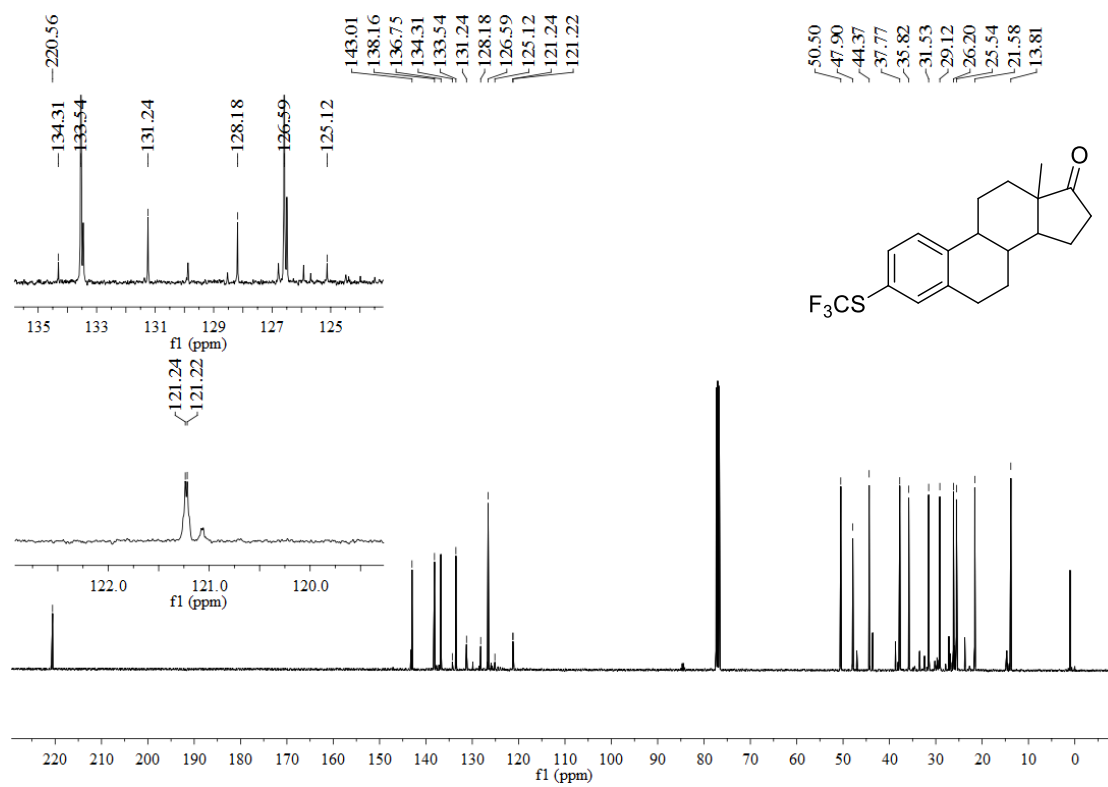

$^1\text{H}$  NMR spectrum of **3j** (400 MHz,  $\text{CDCl}_3$ )

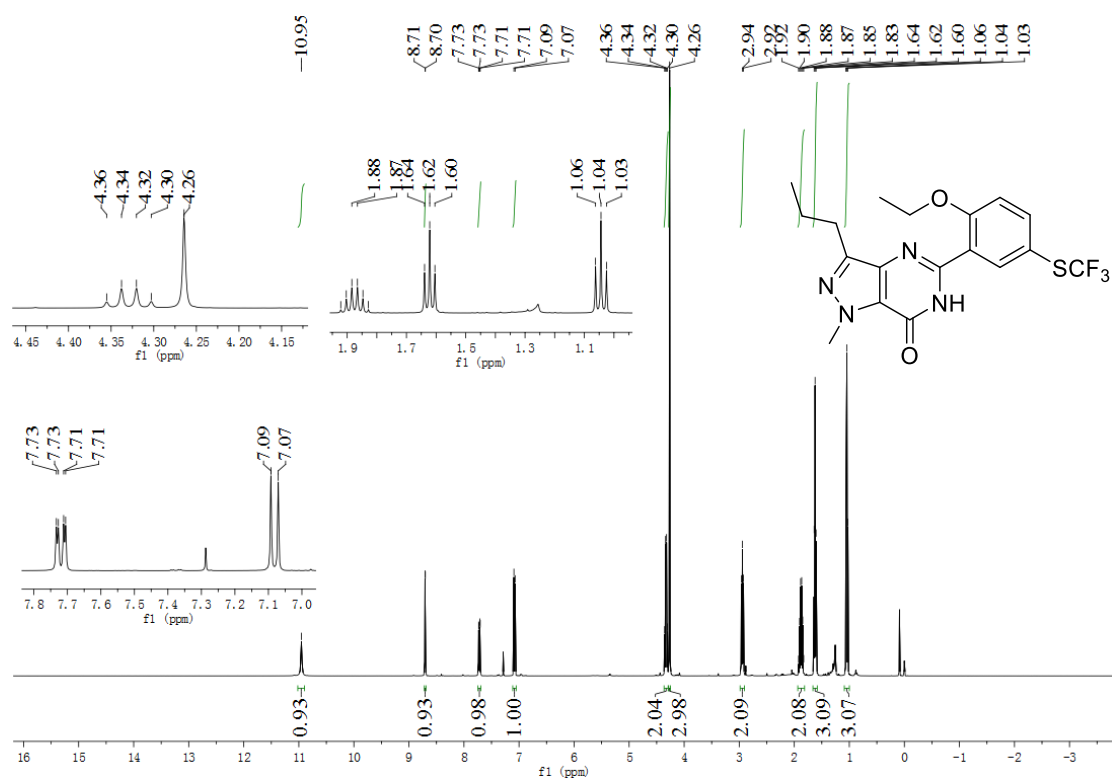

$^{19}\text{F}$  NMR spectrum of **3j** (376 MHz,  $\text{CDCl}_3$ )

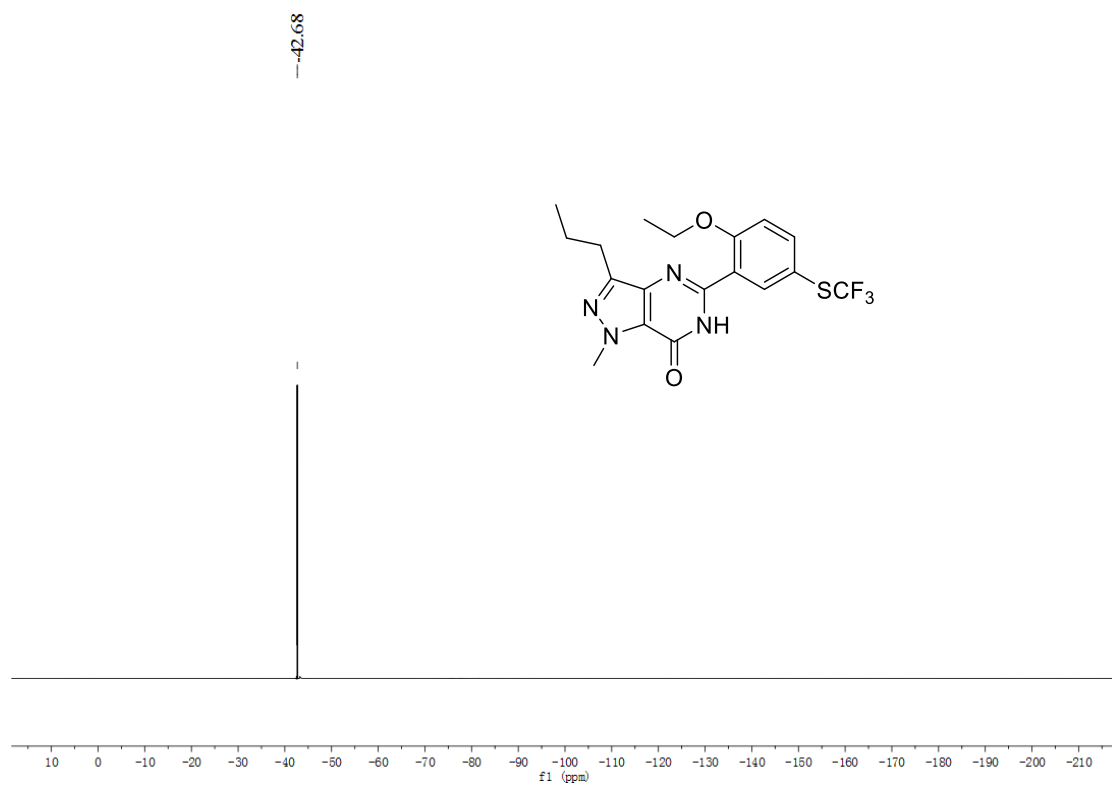

$^{13}\text{C}$  NMR spectrum of **3j** (101 MHz,  $\text{CDCl}_3$ )

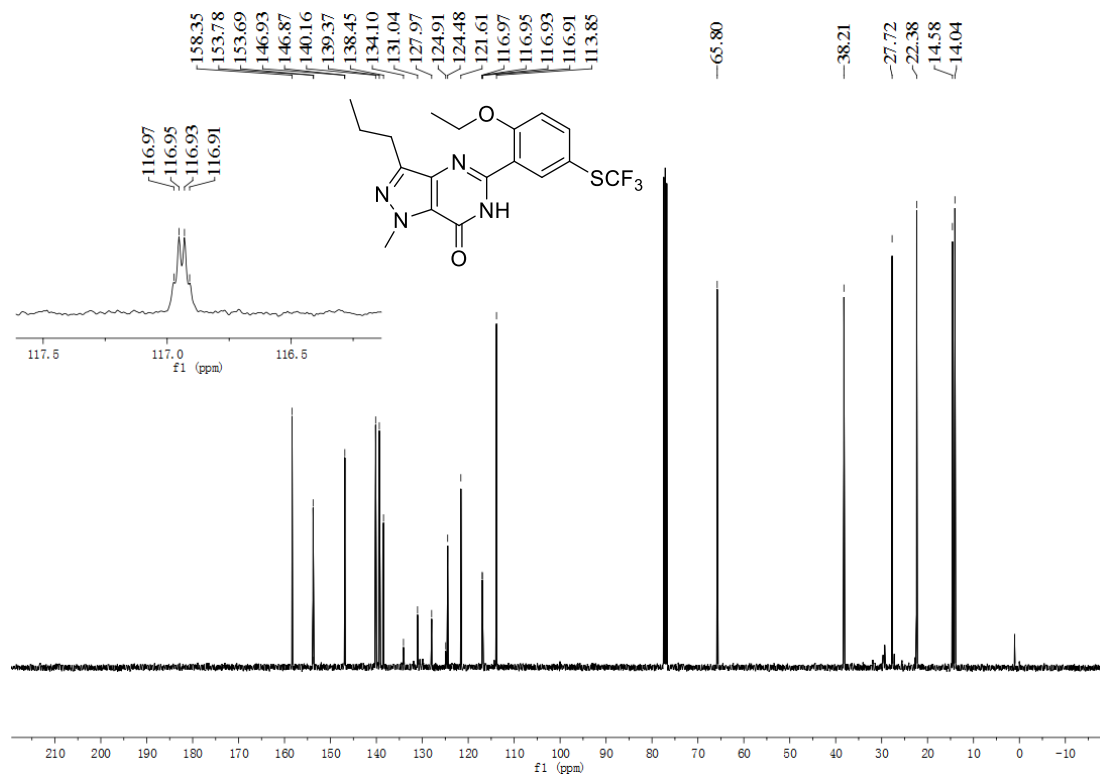

$^1\text{H}$  NMR spectrum of **3k** (400 MHz,  $\text{CDCl}_3$ )

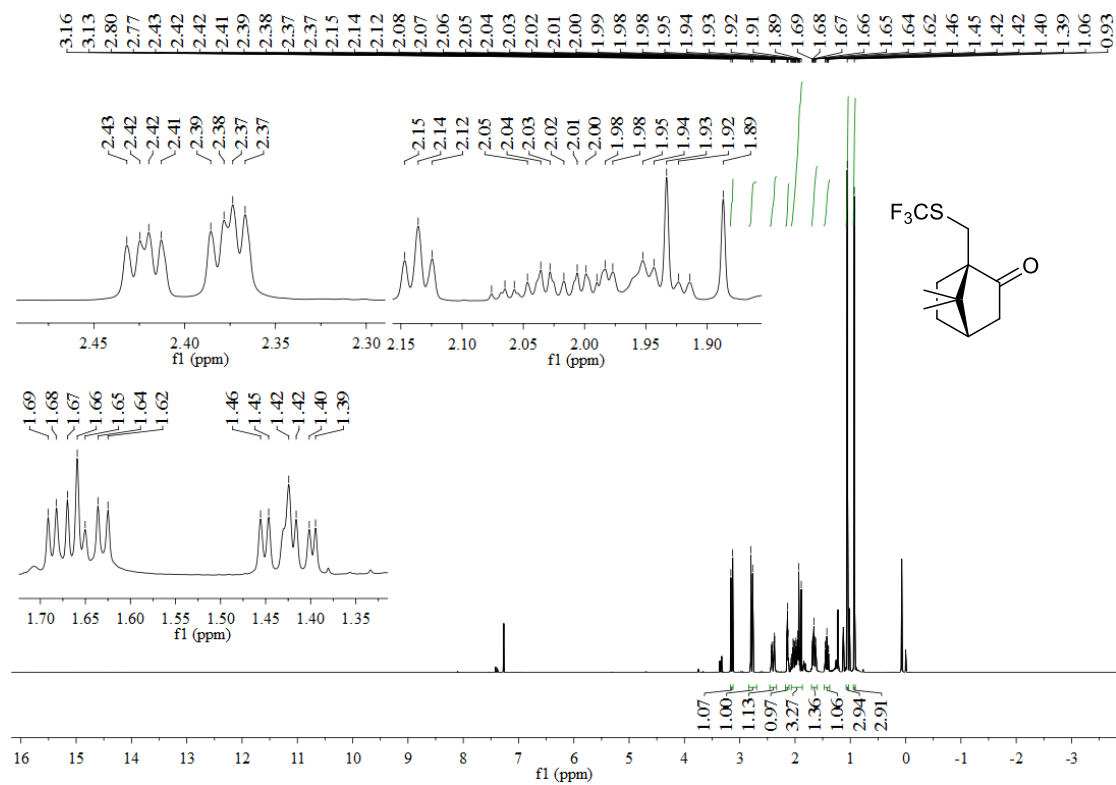

$^{19}\text{F}$  NMR spectrum of **3k** (376 MHz,  $\text{CDCl}_3$ )

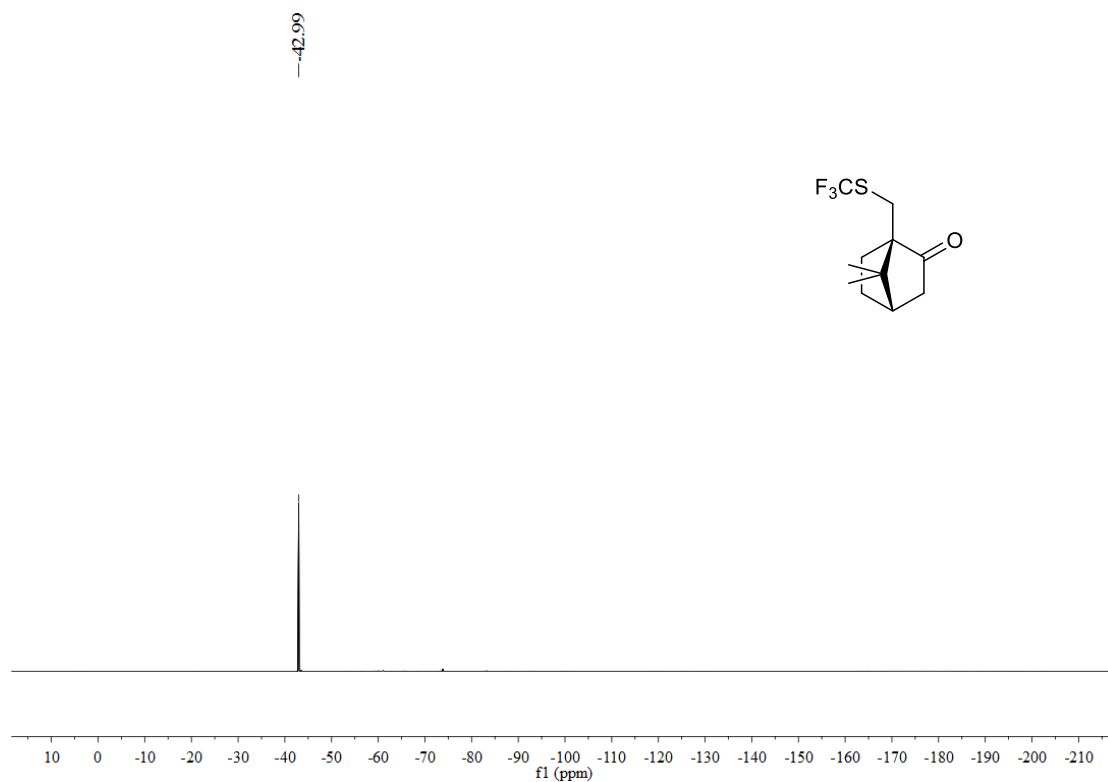

$^{13}\text{C}$  NMR spectrum of **3k** (101 MHz,  $\text{CDCl}_3$ )

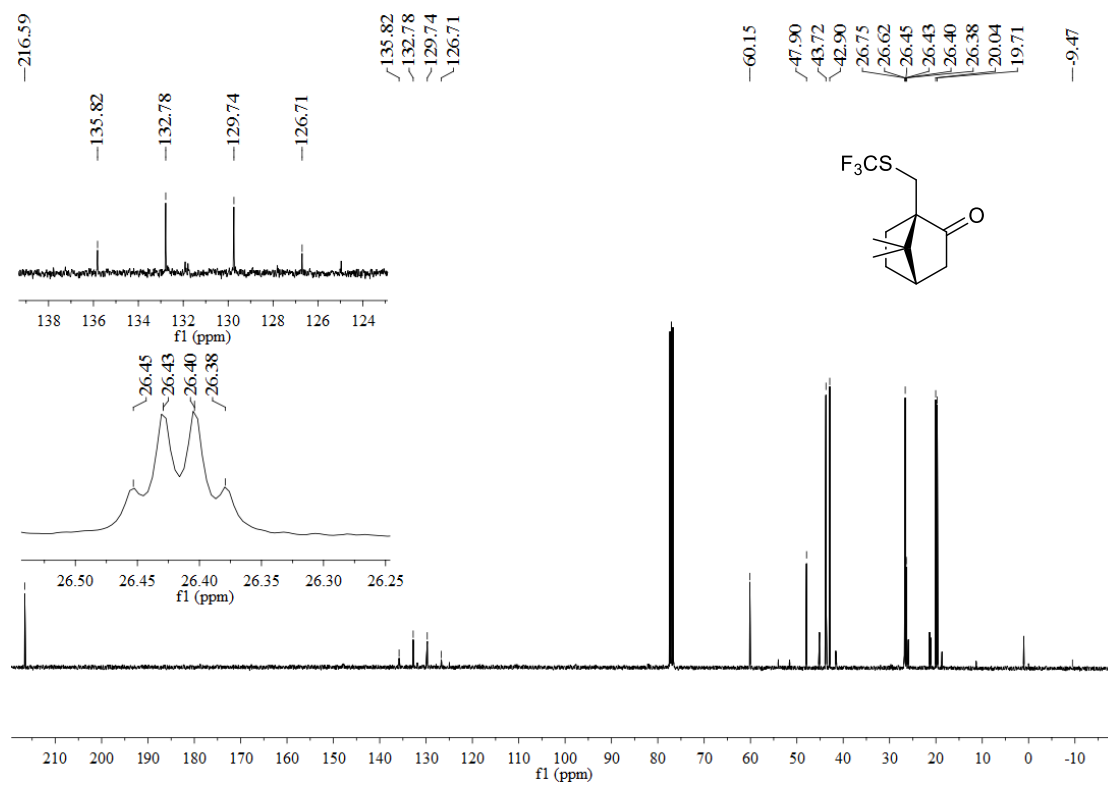

## 8. HRMS analysis reports for the new compounds

HRMS (EI) spectra of **2s**

National Center for Organic Mass Spectrometry in Shanghai  
Shanghai Institute of Organic Chemistry  
Chinese Academic of Sciences  
High Resolution EI-MS Report  
Low Resolution EI-MS Report

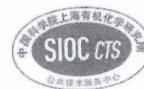

Instrument: Waters Premier GC-TOF MS  
Operation Mode: EI Positive Ion Mode (Electron Energy: 70eV)  
Card Serial Number: GCT-P-EI-T21-2738  
Sample Serial Number: 2019551-ZK-1  
Operator: Li Date: 2021/11/01

| m/z      | Theo. Mass | Delta (ppm) | RDB equiv. | Composition                                                    |
|----------|------------|-------------|------------|----------------------------------------------------------------|
| 239.9988 | 239.9988   | 0.00        | 12.0       | C <sub>12</sub> H <sub>4</sub> O <sub>2</sub> N <sub>2</sub> S |
| 239.9984 | 239.9984   | 1.66        | 8.0        | C <sub>11</sub> H <sub>6</sub> O <sub>3</sub> ClF              |
| 239.9982 | 239.9982   | 2.56        | 4.0        | C <sub>9</sub> H <sub>8</sub> ClF <sub>3</sub> S               |
| 239.9995 | 239.9995   | -2.72       | 21.0       | C <sub>20</sub>                                                |
| 239.9995 | 239.9995   | -3.10       | 4.0        | C <sub>8</sub> H <sub>7</sub> O <sub>4</sub> ClF <sub>2</sub>  |

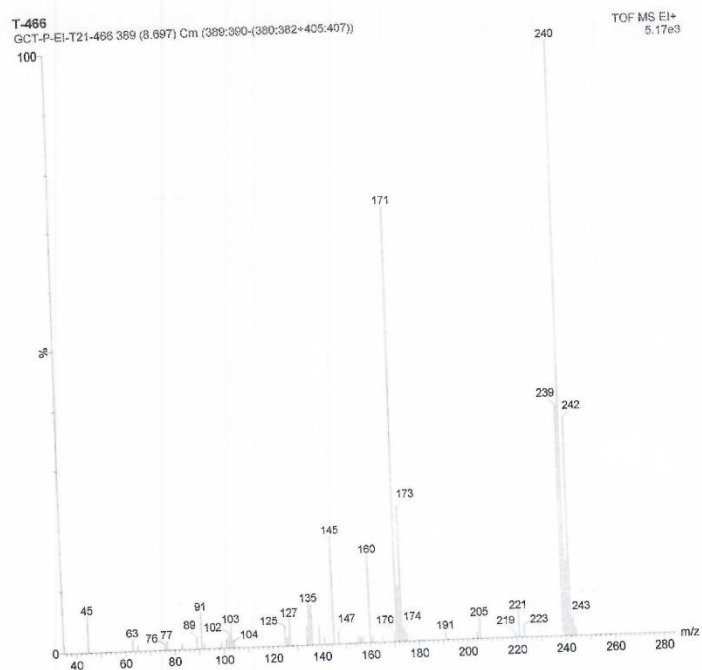

HRMS (EI) spectra of **2t**

National Center for Organic Mass Spectrometry in Shanghai  
 Shanghai Institute of Organic Chemistry  
 Chinese Academic of Sciences  
 High Resolution EI-MS Report  
 Low Resolution EI-MS Report

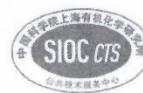

Instrument: Waters Premier GC-TOF MS  
 Operation Mode: EI Positive Ion Mode (Electron Energy: 70eV)  
 Card Serial Number: GCT-P-EI-T21-2739  
 Sample Serial Number: 2019551-ZK-2  
 Operator: Li Date: 2021/11/01

| m/z      | Theo. Mass | Delta (ppm) | RDB equiv. | Composition                                                                 |
|----------|------------|-------------|------------|-----------------------------------------------------------------------------|
| 245.9283 | 245.9281   | 0.70        | 8.0        | C <sub>9</sub> H <sub>3</sub> O <sub>3</sub> Cl <sub>2</sub> F              |
|          | 245.9279   | 1.58        | 4.0        | C <sub>7</sub> H <sub>3</sub> Cl <sub>2</sub> F <sub>3</sub> S              |
|          | 245.9293   | -3.95       | 4.0        | C <sub>6</sub> H <sub>2</sub> O <sub>4</sub> Cl <sub>2</sub> F <sub>2</sub> |

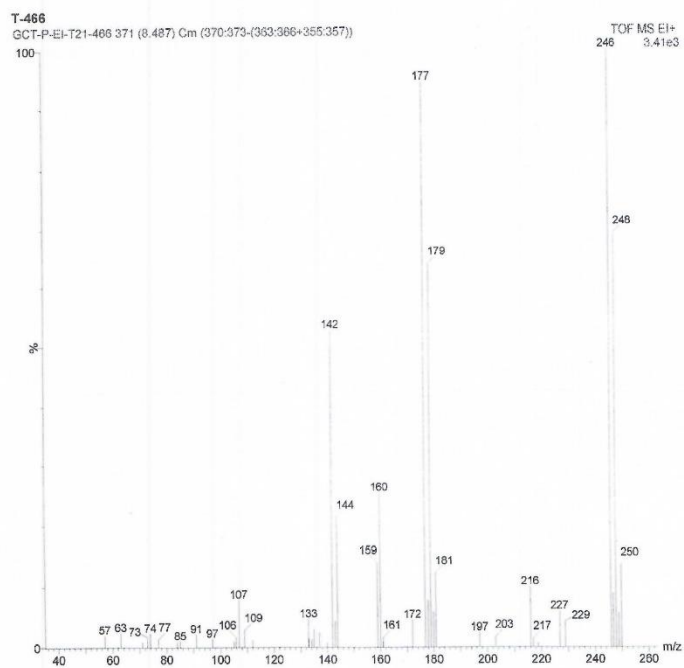



National Center for Organic Mass Spectrometry in Shanghai  
 Shanghai Institute of Organic Chemistry  
 Chinese Academic of Sciences  
 High Resolution EI-MS Report  
 Low Resolution EI-MS Report

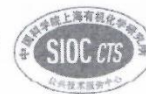

Instrument: Waters Premier GC-TOF MS  
 Operation Mode: EI Positive Ion Mode (Electron Energy: 70eV)  
 Card Serial Number: GCT-P-EI-T21-2740  
 Sample Serial Number: 2019551-ZK-3  
 Operator: Li Date: 2021/11/01

| m/z      | Theo. Mass | Delta (ppm) | RDB equiv. | Composition                                                      |
|----------|------------|-------------|------------|------------------------------------------------------------------|
| 253.0012 | 253.0011   | 0.55        | 8.5        | C <sub>10</sub> H <sub>6</sub> O <sub>4</sub> N <sub>2</sub> Cl  |
|          | 253.0015   | -1.19       | 5.0        | C <sub>8</sub> H <sub>6</sub> O <sub>3</sub> NF <sub>3</sub> S   |
|          | 253.0015   | -1.31       | 3.5        | C <sub>10</sub> H <sub>12</sub> Cl <sub>2</sub> F <sub>3</sub> S |
|          | 253.0008   | 1.41        | 4.5        | C <sub>8</sub> H <sub>8</sub> ON <sub>2</sub> ClF <sub>2</sub> S |
|          | 253.0008   | 1.54        | 14.5       | C <sub>14</sub> N <sub>2</sub> F <sub>3</sub>                    |

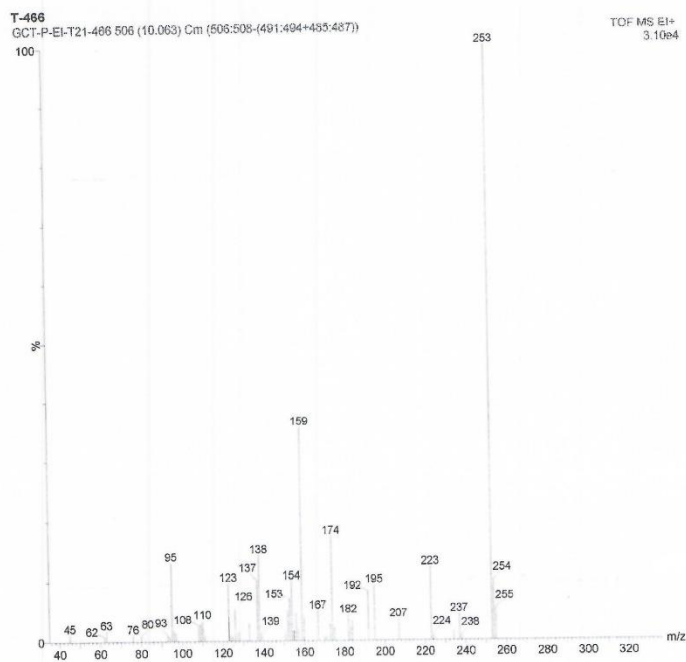

HRMS (EI) spectra of **3e**

National Center for Organic Mass Spectrometry in Shanghai  
 Shanghai Institute of Organic Chemistry  
 Chinese Academic of Sciences  
 High Resolution EI-MS Report  
 Low Resolution EI-MS Report

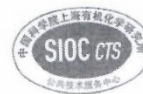

Instrument: Waters Premier GC-TOF MS  
 Operation Mode: EI Positive Ion Mode (Electron Energy: 70eV)  
 Card Serial Number: GCT-P-EI-T21-2741  
 Sample Serial Number: 2019551-ZK-4  
 Operator: Li Date: 2021/11/01

| m/z      | Theo. Mass | Delta (ppm) | RDB equiv. | Composition                                                    |
|----------|------------|-------------|------------|----------------------------------------------------------------|
| 369.9912 | 369.9911   | 0.40        | 21.5       | C <sub>22</sub> O N F <sub>4</sub>                             |
|          | 369.9915   | -0.88       | 8.0        | C <sub>14</sub> H <sub>8</sub> O F <sub>6</sub> S <sub>2</sub> |
|          | 369.9917   | -1.31       | 19.0       | C <sub>22</sub> H <sub>7</sub> O F S <sub>2</sub>              |
|          | 369.9917   | -1.47       | 12.0       | C <sub>16</sub> H <sub>6</sub> O <sub>4</sub> F <sub>4</sub> S |
|          | 369.9906   | 1.62        | 16.0       | C <sub>19</sub> H <sub>5</sub> O <sub>3</sub> F <sub>3</sub> S |

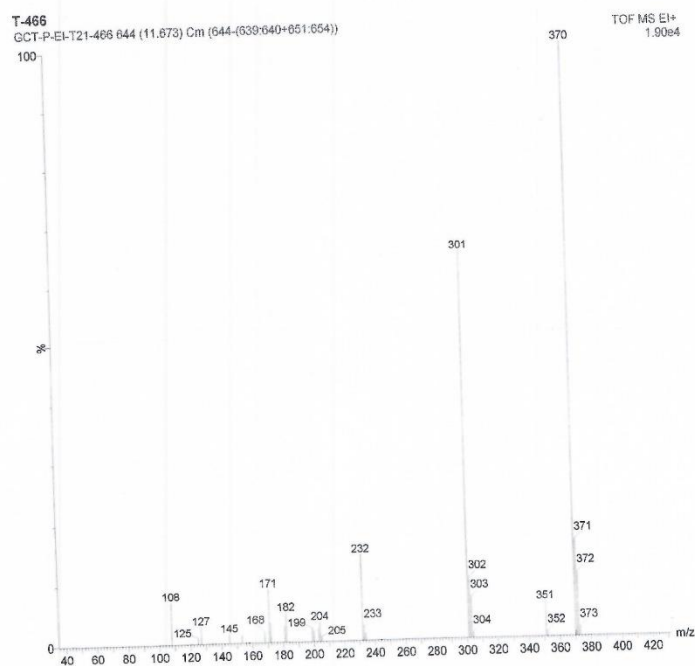

National Center for Organic Mass Spectrometry in Shanghai  
 Shanghai Institute of Organic Chemistry  
 Chinese Academic of Sciences  
 High Resolution EI-MS Report  
 Low Resolution EI-MS Report

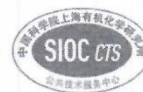

|                       |                          |                         |            |
|-----------------------|--------------------------|-------------------------|------------|
| Instrument:           | Waters Premier GC-TOF MS |                         |            |
| Operation Mode:       | EI Positive Ion Mode     | (Electron Energy: 70eV) |            |
| Card Serial Number:   | GCT-P-EI-T21-2743        |                         |            |
| Sample Serial Number: | 2019551-ZK-6             |                         |            |
| Operator:             | Li                       | Date:                   | 2021/11/01 |

| m/z      | Theo. Mass | Delta (ppm) | RDB equiv. | Composition                                                                 |
|----------|------------|-------------|------------|-----------------------------------------------------------------------------|
| 252.0794 | 252.0795   | -0.45       | -10.0      | H <sub>20</sub> O <sub>4</sub> N <sub>2</sub> F <sub>4</sub> S <sub>2</sub> |
|          | 252.0792   | 0.64        | 7.0        | C <sub>13</sub> H <sub>13</sub> O <sub>4</sub> F                            |
|          | 252.0791   | 1.27        | -4.0       | C <sub>5</sub> H <sub>14</sub> O <sub>4</sub> F <sub>6</sub>                |
|          | 252.0790   | 1.50        | 3.0        | C <sub>11</sub> H <sub>15</sub> O <sub>4</sub> F <sub>3</sub> S             |
|          | 252.0802   | -3.03       | -1.0       | C <sub>8</sub> H <sub>16</sub> O <sub>2</sub> F <sub>4</sub> S              |

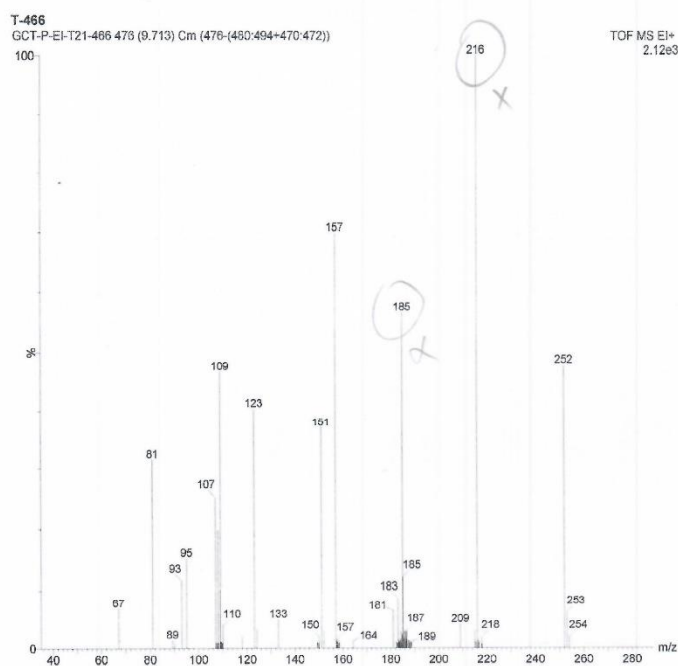

## 9. References

1. (a) Lee, Y. H.; Morandi, B., Palladium-catalyzed intermolecular aryliodination of internal alkynes. *Angew. Chem., Int. Ed.* **2019**, *58*(19), 6444–6448. (b) Xiao, X.; Feng, M.; Jiang, X., Transition-metal-free persulfuration to construct unsymmetrical disulfides and mechanistic study of the sulfur redox process. *Chem. Commun.* **2015**, *51*, 4208–4211.
2. Kurose, R.; Nishii, Y.; Miura, M., Metal-free direct trifluoromethylthiolation of aromatic compounds using triptyceny sulfide catalyst. *Org. Lett.* **2021**, *23*, 2380–2385.
3. Shao, X.; Xu, C.; Lu, L.; Shen, Q., Structure-reactivity relationship of trifluoromethanesulfenates: discovery of an electrophilic trifluoromethylthiolating reagent. *J. Org. Chem.* **2015**, *80*, 3012–3021.
4. Li, A.; Li, Y.; Liu, J.; Chen, J.; Lu, K.; Qiu, D.; Fagnoni, M.; Protti, S.; Zhao, X., Metal-free trifluoromethylthiolation of arylazo sulfones. *J. Org. Chem.* **2021**, *86*, 1292–1299.
5. Weng, Z.; He, W.; Chen, C.; Lee, R.; Tan, D.; Lai, Z.; Kong, D.; Yuan, Y.; Huang, K. W., An air-stable copper reagent for nucleophilic trifluoromethylthiolation of aryl halides. *Angew. Chem., Int. Ed.* **2013**, *52*, 1548–1552.
6. Zheng, C.; Liu, Y.; Hong, J.; Huang, S.; Zhang, W.; Yang, Y.; Fang, G., Copper(I)-promoted trifluoromethylthiolation of arenediazonium salts with AgSCF<sub>3</sub>. *Tetrahedron Lett.* **2019**, *60*, 1404–1407.
7. Zhu, X. X.; Wang, H. Q.; Li, C. G.; Xu, X. L.; Xu, J.; Dai, J. J.; Xu, H. J., Electrochemical trifluoromethylation of thiophenols with sodium trifluoromethanesulfinate. *J. Org. Chem.* **2021**. (DOI: 10.1021/acs.joc.0c02659)
8. Zhang, P.; Li, M.; Xue, X. S.; Xu, C.; Zhao, Q.; Liu, Y.; Wang, H.; Guo, Y.; Lu, L.; Shen, Q., N-trifluoromethylthio-dibenzenesulfonimide: a shelf-stable, broadly applicable electrophilic trifluoromethylthiolating reagent. *J. Org. Chem.* **2016**, *81*, 7486–7509.
9. Exner, B.; Bayarmagnai, B.; Jia, F.; Goossen, L. J., Iron-catalyzed decarboxylation of trifluoroacetate and its application to the synthesis of trifluoromethyl thioethers. *Eur. J. Org. Chem.* **2015**, *21*, 17220–17223.
10. Luo, Z.; Yang, X.; Tsui, G. C., Perfluoroalkylation of thiosulfonates: synthesis of perfluoroalkyl sulfides. *Org. Lett.* **2020**, *22*, 6155–6159.
11. Jia, H.; Häring, A. P.; Berger, F.; Zhang, L.; Ritter, T., Trifluoromethyl thianthrenium triflate: A readily available trifluoromethylating reagent with formal CF<sub>3</sub><sup>+</sup>, CF<sub>3</sub>•, and CF<sub>3</sub><sup>-</sup> reactivity. *J. Am. Chem. Soc.* **2021**, *143*, 7623–7628.
12. Zheng, C.; Jiang, C.; Huang, S.; Zhao, K.; Fu, Y.; Ma, M.; Hong, J., Transition-metal-free synthesis of aryl trifluoromethyl thioethers through indirect trifluoromethylthiolation of sodium arylsulfinate with TMSCF<sub>3</sub>. *Org. Lett.* **2021**, *23*, 6982–6986.
13. Kieltsch, I.; Eisenberger, P.; Togni, A., Mild electrophilic trifluoromethylation of carbon- and sulfur-centered nucleophiles by a hypervalent iodine(III)–CF<sub>3</sub> reagent. *Angew. Chem., Int. Ed.* **2007**, *46*, 754–757.
14. Xu, C.; Song, X.; Guo, J.; Chen, S.; Gao, J.; Jiang, J.; Gao, F.; Li, Y.; Wang, M., Synthesis of chloro(phenyl)trifluoromethyl iodane and catalyst-free electrophilic trifluoromethylations. *Org. Lett.* **2018**, *20*, 3933–3937.
15. Goossen, L.; Matheis, C.; Wang, M.; Krause, T., Metal-free trifluoromethylthiolation of alkyl electrophiles via a cascade of thiocyanation and nucleophilic cyanide–CF<sub>3</sub> substitution. *Synlett* **2015**, *26*, 1628–1632.
